# Supplementary material for: A theoretical study into a trans-dioxo MnV porphyrin complex that does not follow the oxygen rebound mechanism in C–H bond activation reactions
Source: Royal Society of Chemistry journal article supplement (doi:10.1039/c5cc08734a), 2015-11-06
Supplement: c5cc08734a1.pdf [file c5cc08734a1.pdf]

**A theoretical study into a *trans*-dioxo Mn<sup>V</sup> porphyrin complex that does not follow oxygen rebound mechanism in C-H bond activation reactions**

Kyung-Bin Cho and Wonwoo Nam

Department of Chemistry and Nano Science, Ewha Womans University, Seoul 03760, Korea.  
Fax: (+82)-2-3277-4114; E-mail: wwnam@ewha.ac.kr

**Electronic Supplementary Information**

## Table of Contents

|                                              |    |
|----------------------------------------------|----|
| Table of Contents .....                      | 2  |
| Methods .....                                | 3  |
| Electronic energy calculations .....         | 3  |
| Free energy calculations .....               | 3  |
| References.....                              | 4  |
| Tables.....                                  | 5  |
| Table S1 .....                               | 5  |
| Table S2.....                                | 5  |
| Table S3.....                                | 5  |
| Table S4.....                                | 6  |
| Table S5.....                                | 7  |
| Table S6.....                                | 7  |
| Table S7.....                                | 7  |
| Table S8.....                                | 8  |
| Table S9.....                                | 9  |
| Table S10.....                               | 9  |
| Table S11.....                               | 10 |
| Table S12.....                               | 10 |
| Table S13.....                               | 11 |
| Table S14.....                               | 11 |
| Coordinates.....                             | 12 |
| Xanthene(•)(+).....                          | 12 |
| [(Por)OMn <sup>V</sup> O] <sup>-</sup> ..... | 12 |
| <b>1</b> + xanthene.....                     | 12 |
| <b>2</b> .....                               | 19 |
| <b>2</b> + xanthene cation.....              | 19 |

## Methods

**Electronic energy calculations.** Density functional theory (DFT)<sup>S1</sup> was applied using the B3LYP functional<sup>S2</sup> as implemented in the Gaussian 09 (G09) package.<sup>S3</sup> The geometries were optimized using the LACVP basis set, which uses Los Alamos ECP on transition metals<sup>S4</sup> (slightly tweaked as implemented in the Jaguar program, used by us due to historical reasons),<sup>S5</sup> and 6-31G on the rest of the atoms.<sup>S6</sup> The stationary states were confirmed by frequency calculations, and the transition states were connected with the ground states on both sides by performing IRC calculations and continuing relaxing the geometry down to ground state from the end geometry obtained by IRC. The high molecular charge (3+) made it necessary to perform the optimizations in solvent to avoid artificial results (*vide infra*).<sup>S7</sup> The solvent (acetonitrile) effects were included using CPCM model with UFF cavity, per G09 default.<sup>S8</sup> Single-point energy evaluations on the optimized geometry were done with the Def2-TZVPP basis set,<sup>S9</sup> obtained from EMSL Basis Set Library.<sup>S10</sup> This resulting electronic energy ( $\Delta E$ ) was used throughout the text as the final energy due to sufficient accuracy (*vide infra*). The Mulliken spin densities are also taken from Def2-TZVPP calculations, unless otherwise noted.

**Free energy calculations.** Free energy calculations were done and presented in the ESI tables below, albeit not used in the text (*vide infra*). Dispersion effects were calculated using DFT-D3 program.<sup>S11</sup> MECP was found using a shell program to G09 that iterates to the same energy and geometry for two different spin states.<sup>S12</sup>

In previous trials, we have found that using gas-phase optimizations in HAT reactions for highly charged species (2+ and above) can cause a hydride transfer (i.e. one proton and two electrons) rather than a net hydrogen atom transfer from the substrate to the metal-oxo species, possibly due to self-interaction errors (SIE). Most of the time, performing optimizations in solvent avoids these artificial results;<sup>S7</sup> hence the solvent effects were included during optimizations. However, in doing so, other problems may arise. Adding thermal contributions then becomes in principle inaccurate since the standard solvent models are parameterized to yield good solvation free energies. This means that thermal effects are already included, to a certain extent, in the obtained electronic energies, hence possibly double counting the thermal contributions<sup>S13</sup> (the same consideration applies to the dispersion correction as well). On the other hand, gas-phase frequency calculations on the so obtained structure may not be meaningful either since the structure may not be in a stationary point without the solvent. This leaves us in principle with no easily available options to calculate in a uniform manner the free energies and at the same time avoid SIE, for highly charge systems, unless one is prepared to enlarge the model system to include counter ions,<sup>S14</sup> which may be more time consuming and sometimes leading to ‘reactions’ between the transition metal complex and the counter ions, which may or may not be realistic.

Assuming though that the above described errors are negligible, the free energies ( $\Delta G$ ) can still be calculated by adding zero-point vibration energy ( $\Delta Z_0$ ), thermal corrections to  $Z_0$  ( $\Delta E(\text{Thermal})$ ) and entropy ( $-T\Delta S$ ). Relatively recent consensus is that dispersion effects are needed as well ( $\Delta \text{Disp}$ ). Also, if the energy of separated reactants in solvent is evaluated, there is a correction factor of  $RT \cdot \ln(24.5)$  due to change of standard states (either subtracted from the complexed states or added to the non-complexed states, depending on the reference state).<sup>S15</sup> In C-H activation

reactions, tunnelling is an issue as well,<sup>S16</sup> but is ignored in the current study since its magnitude is not likely to affect the main conclusions. If using separated reactants as the reference point, it is our experience that  $\Delta\text{Disp}$  are usually large, but is roughly cancelled out by  $-T\Delta S$ . At the same time,  $\Delta Z_0 + RT \cdot \ln(24.5)$  is roughly cancelled out by thermal corrections to  $Z_0$  and complexation energy together. Hence, basing the relative energies on  $\Delta E$  with the complexed reactants as the reference point gives as many times the same values (within some error margins) as free energies  $\Delta G$  with the separated reactants as the reference point, as evidenced by many, many early days DFT  $\Delta E$  calculations that gave surprisingly good agreement with experiments without any corrections. Therefore, we use throughout this study the electronic energies ( $\Delta E$ ) without any correction factors (except for solvent modelling, which is included by default on all calculations) due to its simplicity, both in calculation and analysis. Our approach is ultimately validated by the good agreement with experiments, within the expected error margins ( $\pm 3 \text{ kcal mol}^{-1}$ ).

## References

- S1. W. Kohn and L. J. Sham, *Phys. Rev. A*, 1965, **140**, 1133.
- S2. (a) A.D. Becke, *Phys. Rev. A*, 1988, **38**, 3098; (b) A.D. Becke, *J. Chem. Phys.*, 1993, **98**, 1372; (c) A.D. Becke, *J. Chem. Phys.*, 1993, **98**, 5648; (d) C. Lee, W. T. Yang and R. G. Parr, *Phys. Rev. B*, 1988, **37**, 785.
- S3. M. J. Frisch, G. W. Trucks, H. B. Schlegel, G. E. Scuseria, M. A. Robb, J. R. Cheeseman, G. Scalmani, V. Barone, B. Mennucci, G. A. Petersson, H. Nakatsuji, M. Caricato, X. Li, H. P. Hratchian, A. F. Izmaylov, J. Bloino, G. Zheng, J. L. Sonnenberg, M. Hada, M. Ehara, K. Toyota, R. Fukuda, J. Hasegawa, M. Ishida, T. Nakajima, Y. Honda, O. Kitao, H. Nakai, T. Vreven, J. A. Montgomery, Jr., J. E. Peralta, F. Ogliaro, M. Bearpark, J. J. Heyd, E. Brothers, K. N. Kudin, V. N. Staroverov, T. Keith, R. Kobayashi, J. Normand, K. Raghavachari, A. Rendell, J. C. Burant, S. S. Iyengar, J. Tomasi, M. Cossi, N. Rega, J. M. Millam, M. Klene, J. E. Knox, J. B. Cross, V. Bakken, C. Adamo, J. Jaramillo, R. Gomperts, R. E. Stratmann, O. Yazyev, A. J. Austin, R. Cammi, C. Pomelli, J. W. Ochterski, R. L. Martin, K. Morokuma, V. G. Zakrzewski, G. A. Voth, P. Salvador, J. J. Dannenberg, S. Dapprich, A. D. Daniels, O. Farkas, J. B. Foresman, J. V. Ortiz, J. Cioslowski, and D. J. Fox, *Gaussian 09, Revisions B.01 and D.01*, Gaussian, Inc., Wallingford CT, 2010.
- S4. (a) P. J. Hay and W. R. Wadt, *J. Chem. Phys.*, 1985, **82**, 270; (b) P. J. Hay and W. R. Wadt, *J. Chem. Phys.*, 1985, **82**, 299.
- S5. Jaguar, version 7.7, Schrödinger, LLC, New York, NY, 2010.
- S6. (a) W. J. Hehre, R. Ditchfield and J. A. Pople, *J. Chem. Phys.*, 1972, **56**, 2257; (b) M. M. Francl, W. J. Pietro, W. J. Hehre, J. S. Binkley, M. S. Gordon, D. J. DeFrees and J. A. Pople, *J. Chem. Phys.*, 1982, **77**, 3654.
- S7. (a) A. J. Johansson, M. R. A. Blomberg, and P. E. M. Siegbahn, *J. Chem. Phys.*, 2008, **129**, 154301; (b) A. J. Johansson, M. R. A. Blomberg, and P. E. M. Siegbahn, *J. Phys. Chem. C*, 2007, **111**, 12397.
- S8. M. Cossi, N. Rega, G. Scalmani and V. Barone, *J. Comput. Chem.*, 2003, **24**, 669.
- S9. (a) F. Weigend and R. Ahlrichs, *Phys.Chem.Chem.Phys.*, 2005, **7**, 3297; (b) A. Schäfer, C. Huber and R. Ahlrichs, *J. Chem. Phys.*, 1994, **100**, 5829.
- S10. (a) D. Feller, *J. Comp. Chem.*, 1996, **17**, 1571; (b) K.L. Schuchardt, B.T. Didier, T. Elsethagen, L. Sun, V. Gurumoorathi, J. Chase, J. Li and T.L. J. Windus, *Chem. Inf. Model.*, 2007, **47**, 1045.
- S11. S. Grimme, J. Antony, S. Ehrlich, and H. Krieg, *J. Chem. Phys.*, 2010, **132**, 154104.
- S12. J. N. Harvey, M. Aschi, H. Schwarz and W. Koch, *Theor. Chem. Acc.*, 1998, **99**, 95.
- S13. J. Ho, A. Klamt and M. L. Coote, *J. Phys. Chem. A*, 2010, **114**, 13442.
- S14. D. Janardanan, D. Usharani, H. Chen and S. Shaik, *J. Phys. Chem. Lett.*, 2011, **2**, 2610.
- S15. (a) P. Winget, C. J. Cramer and D. G. Truhlar, *Theor. Chem. Acc.*, 2004, **112**, 217; (b) A. Lewis, J. A. Bumpus, D. G. Truhlar and C. J. Cramer, *J. Chem. Edu.*, 2004, **81**, 596.
- S16. D. Mandal, R. Ramanan, D. Usharani, D. Janardanan, B. Wang and S. Shaik, *J. Am. Chem. Soc.*, 2015, **137**, 722.

## Tables

**Table S1.** Relative energies of the [(Por)OMn<sup>VO</sup>]<sup>-</sup> species in different spin states, in kcal/mol.

| Multiplicity | Frequency         | $\Delta$ LACVP | $\Delta$ Def2-TZVPP | $\Delta E^a$ | $\Delta Z_0$ | $\Delta E(\text{Thermal})^b$ | $-T\Delta S^b$ | $\Delta$ Disp | $\Delta G^c$ |
|--------------|-------------------|----------------|---------------------|--------------|--------------|------------------------------|----------------|---------------|--------------|
| 1            | 63.1139           | 0.00           | +0.00               | <b>0.00</b>  | +0.00        | +0.00                        | +0.00          | +0.00         | <b>0.00</b>  |
| 3 (a)        | 49.7236           | 1.70           | +6.00               | <b>7.71</b>  | -0.64        | +0.22                        | -1.23          | +0.35         | <b>6.40</b>  |
| 3 (b)        | <i>i</i> 982.1234 | 37.44          | ---- <sup>d</sup>   | <b>37.44</b> | -4.29        | +0.22                        | -1.11          | +0.27         | <b>32.54</b> |
| 3 (c)        | <i>i</i> 876.3514 | 18.06          | ---- <sup>d</sup>   | <b>18.06</b> | -1.74        | +0.14                        | -1.17          | +0.24         | <b>15.53</b> |
| 3 (d)        | <i>i</i> 188.9488 | 15.82          | ---- <sup>d</sup>   | <b>15.82</b> | -1.81        | +0.10                        | -0.93          | +0.37         | <b>13.55</b> |
| 3 (e)        | 58.8815           | 11.91          | +8.41               | <b>20.32</b> | -1.41        | +0.42                        | -1.57          | +0.40         | <b>18.15</b> |
| 5 (a)        | 52.0186           | 38.67          | ---- <sup>d</sup>   | <b>38.67</b> | -3.31        | +0.54                        | -2.20          | +0.57         | <b>34.27</b> |
| 5 (b)        | 188.744           | 3.88           | +6.74               | <b>10.62</b> | -0.73        | +0.27                        | -1.66          | +0.39         | <b>8.88</b>  |

<sup>a</sup> Electronic energy as sum of the two previous columns. <sup>b</sup> T = 298.15 K. <sup>c</sup> Sum of the five previous columns, but not used in the text due to added uncertainty (see Methods section). <sup>d</sup> Deemed unnecessary calculations due to either not being a ground state (imaginary frequencies present) or too high  $\Delta$ LACVP energy to be a realistic alternative.

**Table S2.** Relative singlet-triplet energy difference (<sup>3</sup> $\Delta E$ -<sup>1</sup> $\Delta E$ ) for the [(Por)OMn<sup>VO</sup>]<sup>-</sup> species using different functionals, in kcal/mol.

| Functional (X) | <sup>3</sup> $\Delta E_{[X/\Delta\text{Def2-TZVPP}/\text{B3LYP}/\text{LACVP}]} - ^1\Delta E_{[X/\Delta\text{Def2-TZVPP}/\text{B3LYP}/\text{LACVP}]}$ |
|----------------|------------------------------------------------------------------------------------------------------------------------------------------------------|
| B3LYP          | 7.71                                                                                                                                                 |
| BLYP           | 26.30                                                                                                                                                |
| BP86           | 28.94                                                                                                                                                |
| M11L           | 20.71                                                                                                                                                |
| OLYP           | 24.18                                                                                                                                                |
| B3LYP*         | 14.96                                                                                                                                                |
| PW91PW91       | 28.53                                                                                                                                                |

**Table S3.** Relative quartet-doublet energy difference (<sup>4</sup> $\Delta E$ -<sup>2</sup> $\Delta E$ ) for the [(Por)OMn<sup>IV</sup>OH]<sup>-</sup> species using different functionals, in kcal/mol.

| Functional (X) | <sup>4</sup> $\Delta E_{[X/\Delta\text{Def2-TZVPP}/\text{B3LYP}/\text{LACVP}]} - ^2\Delta E_{[X/\Delta\text{Def2-TZVPP}/\text{B3LYP}/\text{LACVP}]}$ |
|----------------|------------------------------------------------------------------------------------------------------------------------------------------------------|
| B3LYP          | -9.67                                                                                                                                                |
| BLYP           | -2.36                                                                                                                                                |
| BP86           | -2.50                                                                                                                                                |
| M11L           | -1.70                                                                                                                                                |
| OLYP           | -9.38                                                                                                                                                |
| B3LYP*         | -9.44                                                                                                                                                |
| PW91PW91       | -4.36                                                                                                                                                |

**Table S4.** Relative energies for the C-H activation reaction of xanthene by [(TF<sub>4</sub>TMAP)OMn<sup>VO</sup>]<sup>3+</sup> (**1**), in kcal/mol.

|                          | $\Delta$ LACVP | $\Delta$ Def2-TZVPP | $\Delta E^a$  | $\Delta Z_0$ | $\Delta E(\text{Thermal})^b$ | $-T\Delta S^b$ | $\Delta$ Disp | $RT \cdot \ln(24.5)^c$ | $\Delta G^d$  |
|--------------------------|----------------|---------------------|---------------|--------------|------------------------------|----------------|---------------|------------------------|---------------|
| <b>Mult = 1</b>          |                |                     |               |              |                              |                |               |                        |               |
| Reactant                 | 0.00           | +0.00               | <b>0.00</b>   | +0.00        | +0.00                        | +0.00          | +0.00         |                        | <b>0.00</b>   |
| TS <sub>C-H</sub>        | 9.58           | +7.44               | <b>17.02</b>  | -4.59        | -0.28                        | +3.59          | -6.60         |                        | <b>9.14</b>   |
| Intermediate             | -16.60         | +1.22               | <b>-15.38</b> | -2.81        | +0.55                        | -0.10          | +1.71         |                        | <b>-16.02</b> |
| Mn <sup>IV</sup> OH + C• | -14.92         | +0.00               | <b>-14.92</b> | -3.08        | -1.00                        | -9.75          | +7.03         | +1.89                  | <b>-19.84</b> |
| TS <sub>reb</sub>        | -3.41          | +5.00               | <b>1.60</b>   | -2.93        | -0.19                        | +3.72          | -8.28         |                        | <b>-6.09</b>  |
| Product                  | -24.05         | +1.95               | <b>-22.10</b> | -0.25        | -0.23                        | +3.84          | -11.69        |                        | <b>-30.43</b> |
| <b>Mult = 3 (a)</b>      |                |                     |               |              |                              |                |               |                        |               |
| Reactant                 | 3.60           | +5.94               | <b>9.54</b>   | -0.61        | +0.17                        | -0.63          | -0.43         |                        | <b>8.03</b>   |
| TS <sub>C-H</sub>        | 7.23           | +6.19               | <b>13.42</b>  | -3.81        | -0.42                        | +3.04          | -6.04         |                        | <b>6.19</b>   |
| Intermediate             | -21.58         | -1.29               | <b>-22.87</b> | -1.92        | +0.31                        | -0.27          | +0.67         |                        | <b>-24.07</b> |
| Mn <sup>IV</sup> OH + C• | -19.29         | -2.92               | <b>-22.21</b> | -2.18        | -1.19                        | -9.70          | +6.93         | +1.89                  | <b>-26.46</b> |
| TS <sub>reb</sub>        | -9.53          | +1.19               | <b>-8.34</b>  | -2.70        | -0.16                        | +3.15          | -7.21         |                        | <b>-15.26</b> |
| Product                  | -32.37         | +2.10               | <b>-30.26</b> | -0.28        | -0.25                        | +2.94          | -11.29        |                        | <b>-39.15</b> |
| <b>Mult = 3 (b)</b>      |                |                     |               |              |                              |                |               |                        |               |
| Reactant                 | 11.74          | +10.58              | <b>22.31</b>  | -1.39        | +0.40                        | -1.35          | +0.46         |                        | <b>20.44</b>  |
| TS <sub>C-H</sub>        | 14.99          | +8.64               | <b>23.63</b>  | -4.06        | -0.27                        | +2.76          | -6.06         |                        | <b>16.00</b>  |
| Intermediate             | -15.88         | +1.43               | <b>-14.44</b> | -2.72        | +0.54                        | -1.47          | -1.17         |                        | <b>-19.26</b> |
| Mn <sup>IV</sup> OH + C• | -14.92         | +0.00               | <b>-14.92</b> | -3.08        | -1.00                        | -9.75          | +7.03         | +1.89                  | <b>-19.84</b> |
| TS <sub>reb</sub>        | -6.58          | +2.01               | <b>-4.57</b>  | -2.10        | -0.30                        | +3.64          | -7.68         |                        | <b>-11.01</b> |
| Product                  | -35.11         | +3.68               | <b>-31.44</b> | +0.51        | -0.34                        | +3.43          | -10.62        |                        | <b>-38.46</b> |
| <b>Mult = 5</b>          |                |                     |               |              |                              |                |               |                        |               |
| Reactant                 | 5.67           | +6.88               | <b>12.55</b>  | -0.73        | +0.22                        | -1.16          | -0.45         |                        | <b>10.42</b>  |
| TS <sub>C-H</sub>        | 8.88           | +6.94               | <b>15.81</b>  | -3.73        | -0.40                        | +2.53          | -5.81         |                        | <b>8.42</b>   |
| Intermediate             | -21.88         | -1.01               | <b>-22.89</b> | -1.85        | +0.27                        | +0.93          | +0.33         |                        | <b>-23.21</b> |
| Mn <sup>IV</sup> OH + C• | -19.29         | -2.92               | <b>-22.21</b> | -2.18        | -1.19                        | -9.70          | +6.93         | +1.89                  | <b>-26.46</b> |
| TS <sub>reb</sub>        | -8.93          | +1.57               | <b>-7.35</b>  | -3.13        | -0.17                        | +3.04          | -7.23         |                        | <b>-14.85</b> |
| Product                  | -31.91         | +2.73               | <b>-29.18</b> | -0.45        | -0.19                        | +2.69          | -11.94        |                        | <b>-39.07</b> |
| <b>MECP</b>              |                |                     |               |              |                              |                |               |                        |               |
| <b>Mult 1 ⇌ 3</b>        |                |                     |               |              |                              |                |               |                        |               |
| MECP1                    | 5.40           | +5.42               | <b>10.82</b>  |              |                              |                |               |                        |               |
| MECP2                    | 9.59           | +6.70               | <b>16.29</b>  |              |                              |                |               |                        |               |

<sup>a</sup> Electronic energy as sum of the two previous columns. <sup>b</sup> T = 298.15 K. <sup>c</sup> Correction for change of standard state for dissociation in solvent. <sup>d</sup> Free energy as sum of the six previous columns, but not used in the text due to added uncertainty (see Methods section).

**Table S5.** Relative energies for the hydroxylation reaction of xanthen cation by [(TF<sub>4</sub>TMAP)(CH<sub>3</sub>CN)Mn<sup>III</sup>OH]<sup>4+</sup>, in kcal/mol.<sup>a</sup>

|                                       | $\Delta$ LACVP | $\Delta$ Def2-TZVPP | $\Delta E^b$ | $\Delta Z_0$ | $\Delta E(\text{Thermal})^c$ | $-T\Delta S^c$ | $\Delta$ Disp | $RT \cdot \ln(24.5)^d$ | $\Delta G^e$ |
|---------------------------------------|----------------|---------------------|--------------|--------------|------------------------------|----------------|---------------|------------------------|--------------|
| Mn <sup>III</sup> OH + C <sup>+</sup> | 1.51           | -3.24               | <b>-1.73</b> | -0.14        | -1.53                        | -9.98          | +11.07        | +1.89                  | <b>-0.42</b> |
| Intermediate                          | 0.00           | +0.00               | <b>0.00</b>  | +0.00        | +0.00                        | +0.00          | +0.00         |                        | <b>0.00</b>  |
| TS <sub>reb</sub>                     | 4.85           | +2.09               | <b>6.94</b>  | +0.07        | -0.73                        | +3.86          | -4.72         |                        | <b>5.42</b>  |
| Product                               | 0.15           | +2.08               | <b>2.24</b>  | +2.05        | -0.89                        | +4.24          | -5.67         |                        | <b>1.96</b>  |

<sup>a</sup> The calculated system multiplicity is triplet. <sup>b</sup> Electronic energy as sum of the two previous columns. <sup>c</sup> T = 298.15 K. <sup>d</sup> Correction for change of standard state for dissociation in solvent. <sup>e</sup> Sum of the six previous columns, but not used in the text due to added uncertainty (see Methods section).

**Table S6.** Mulliken spin density distribution of the [(Por)OMn<sup>VO</sup>]<sup>-</sup> species in different spin states.<sup>a</sup>

| Multiplicity       | Mn          | O <sup>1</sup> | O <sup>2</sup> | 4xN          | Porphyrin   |
|--------------------|-------------|----------------|----------------|--------------|-------------|
| <b>1</b>           | <b>0.00</b> | <b>0.00</b>    | <b>0.00</b>    | <b>0.00</b>  | <b>0.00</b> |
| <b>3 (a)</b>       | <b>2.59</b> | <b>0.54</b>    | <b>-0.95</b>   | <b>-0.19</b> | <b>0.00</b> |
| 3 (b) <sup>b</sup> | -0.13       | 0.08           | 0.08           | 0.74         | 1.23        |
| 3 (c) <sup>b</sup> | 0.42        | 0.77           | 0.77           | 0.10         | -0.07       |
| 3 (d) <sup>b</sup> | 0.04        | 0.96           | 0.96           | 0.10         | -0.07       |
| 3 (e)              | 1.30        | -0.31          | 1.01           | -0.07        | 0.07        |
| 5 (a) <sup>b</sup> | 2.47        | 0.64           | -0.87          | 0.56         | 1.20        |
| <b>5 (b)</b>       | <b>2.58</b> | <b>0.55</b>    | <b>1.00</b>    | <b>-0.14</b> | <b>0.01</b> |

<sup>a</sup> The energetically lowest configuration in each spin state is marked in bold. <sup>b</sup> Spin densities are taken from LACVP calculations as larger basis set calculations were deemed unnecessary for these species.

**Table S7.** Mulliken spin density distribution for the [(Por)OMn<sup>VO</sup>]<sup>-</sup> species in triplet states.<sup>a</sup>

| Functional | Mn   | O <sup>1</sup> | O <sup>2</sup> | 4xN   | Porphyrin |
|------------|------|----------------|----------------|-------|-----------|
| B3LYP      | 2.59 | 0.54           | -0.95          | -0.19 | 0.00      |
| BLYP       | 2.28 | 0.43           | -0.58          | -0.18 | 0.05      |
| BP86       | 2.31 | 0.43           | -0.57          | -0.21 | 0.05      |
| M11L       | 2.41 | 0.72           | -0.92          | -0.25 | 0.05      |
| OLYP       | 2.47 | 0.47           | -0.73          | -0.25 | 0.04      |
| B3LYP*     | 2.55 | 0.55           | -0.91          | -0.19 | 0.01      |
| PW91PW91   | 2.33 | 0.43           | -0.60          | -0.22 | 0.05      |

<sup>a</sup> Spin densities are triplet structure spin densities (the singlet spin densities are all closed shells) taken from X/Def2-TZVPP//B3LYP/LACVP calculations, where X is the investigated functional.

**Table S8.** Mulliken spin density distribution for the [(Por)OMn<sup>IV</sup>OH]<sup>-</sup> species using different functionals.

| Multiplicity | Functional            | Mn   | O <sup>1</sup> | O <sup>2</sup> | 4xN   | Porphyrin |
|--------------|-----------------------|------|----------------|----------------|-------|-----------|
| 2            | B3LYP                 | 1.65 | -0.59          | 0.03           | -0.16 | 0.06      |
|              | BLYP <sup>a</sup>     | 0.82 | 0.22           | -0.02          | -0.06 | 0.04      |
|              | BP86 <sup>a</sup>     | 0.82 | 0.22           | -0.01          | -0.07 | 0.05      |
|              | M11L                  | 1.72 | -0.66          | 0.06           | -0.21 | 0.09      |
|              | OLYP <sup>a</sup>     | 0.95 | 0.12           | -0.03          | -0.10 | 0.06      |
|              | B3LYP*                | 1.43 | -0.37          | 0.02           | -0.13 | 0.06      |
|              | PW91PW91 <sup>a</sup> | 0.88 | 0.16           | -0.02          | -0.08 | 0.05      |
| 4            | B3LYP                 | 2.64 | 0.51           | 0.02           | -0.17 | 0.00      |
|              | BLYP                  | 2.52 | 0.58           | 0.04           | -0.18 | 0.04      |
|              | BP86                  | 2.57 | 0.57           | 0.03           | -0.22 | 0.05      |
|              | M11L                  | 2.46 | 0.70           | 0.03           | -0.26 | 0.07      |
|              | OLYP                  | 2.64 | 0.56           | 0.02           | -0.25 | 0.03      |
|              | B3LYP*                | 2.57 | 0.57           | 0.03           | -0.22 | 0.04      |
|              | PW91PW91              | 2.62 | 0.53           | 0.02           | -0.18 | 0.01      |

<sup>a</sup> The spin densities are somewhat different from the B3LYP one, indicating that the orbital mixing is a bit different. However, despite trials, no other spin density distributions were obtained, prompting us to conclude that this is most likely the lowest energy spin density distribution for the given functional.



**Table S9.** Mulliken spin density distribution for the C-H activation reaction of xanthene by [(TF<sub>4</sub>TMAP)OMn<sup>V</sup>O]<sup>3+</sup> (**1**).

|                          | Mn   | O <sub>inactive</sub> | O <sub>active</sub> | 4xN   | Substrate | Porphyrin | 4 x C <sub>6</sub> F <sub>4</sub> N(Me) <sub>3</sub> |
|--------------------------|------|-----------------------|---------------------|-------|-----------|-----------|------------------------------------------------------|
| <b>Mult = 1</b>          |      |                       |                     |       |           |           |                                                      |
| Reactant                 | 0.00 | 0.00                  | 0.00                | 0.00  | 0.00      | 0.00      | 0.00                                                 |
| TS                       | 1.42 | -0.52                 | -0.49               | -0.15 | -0.31     | 0.05      | 0.00                                                 |
| Intermediate             | 1.62 | -0.57                 | 0.04                | -0.15 | -0.99     | 0.05      | 0.00                                                 |
| Mn <sup>IV</sup> OH + C• | 1.62 | -0.57                 | 0.04                | -0.15 | -0.99     | 0.06      | 0.00                                                 |
| TS <sub>reb</sub>        | 1.58 | -0.59                 | 0.03                | -0.17 | -0.56     | -0.26     | -0.01                                                |
| Product                  | 0.94 | -0.07                 | 0.00                | -0.14 | 0.00      | -0.72     | -0.01                                                |
| <b>Mult = 3 (a)</b>      |      |                       |                     |       |           |           |                                                      |
| Reactant                 | 2.56 | 0.59                  | -0.95               | -0.19 | 0.00      | 0.00      | 0.00                                                 |
| TS                       | 2.58 | 0.55                  | -0.66               | -0.19 | -0.29     | 0.00      | 0.00                                                 |
| Intermediate             | 2.60 | 0.55                  | 0.01                | -0.17 | -0.99     | 0.00      | 0.00                                                 |
| Mn <sup>IV</sup> OH + C• | 2.59 | 0.55                  | 0.02                | -0.17 | -1.00     | 0.00      | 0.00                                                 |
| TS <sub>reb</sub>        | 2.61 | 0.50                  | -0.01               | -0.21 | -0.66     | -0.23     | -0.01                                                |
| Product                  | 2.68 | 0.44                  | -0.01               | -0.30 | 0.00      | -0.78     | -0.03                                                |
| <b>Mult = 3 (b)</b>      |      |                       |                     |       |           |           |                                                      |
| Reactant                 | 1.45 | -0.42                 | 1.03                | -0.10 | 0.00      | 0.06      | 0.00                                                 |
| TS                       | 1.44 | -0.42                 | 0.76                | -0.10 | 0.28      | 0.05      | 0.00                                                 |
| Intermediate             | 1.62 | -0.57                 | 0.05                | -0.15 | 1.00      | 0.05      | 0.00                                                 |
| Mn <sup>IV</sup> OH + C• | 1.62 | -0.57                 | 0.04                | -0.15 | 1.01      | 0.06      | 0.00                                                 |
| TS <sub>reb</sub>        | 1.35 | -0.05                 | -0.05               | -0.11 | 0.81      | 0.03      | 0.00                                                 |
| Product                  | 1.61 | 0.45                  | -0.01               | -0.06 | 0.00      | 0.01      | 0.00                                                 |
| <b>Mult = 5</b>          |      |                       |                     |       |           |           |                                                      |
| Reactant                 | 2.53 | 0.60                  | 1.00                | -0.14 | 0.00      | 0.00      | 0.00                                                 |
| TS <sub>C-H</sub>        | 2.55 | 0.59                  | 0.73                | -0.14 | 0.29      | -0.01     | 0.00                                                 |
| Intermediate             | 2.60 | 0.55                  | 0.01                | -0.17 | 1.01      | 0.00      | 0.00                                                 |
| Mn <sup>IV</sup> OH + C• | 2.59 | 0.55                  | 0.02                | -0.17 | 1.00      | 0.00      | 0.00                                                 |
| TS <sub>reb</sub>        | 2.64 | 0.55                  | 0.02                | -0.16 | 0.77      | 0.17      | 0.01                                                 |
| Product                  | 2.66 | 0.48                  | -0.01               | -0.07 | 0.00      | 0.89      | 0.04                                                 |
| <b>MECP Mult 1 ↔ 3</b>   |      |                       |                     |       |           |           |                                                      |
| MECP1 (Mult = 1)         | 1.34 | -0.43                 | -0.79               | -0.15 | -0.01     | 0.04      | 0.00                                                 |
| MECP1 (Mult = 3)         | 2.47 | 0.59                  | -0.86               | -0.19 | 0.00      | -0.01     | 0.00                                                 |
| MECP2 (Mult = 1)         | 1.42 | -0.52                 | -0.49               | -0.15 | -0.31     | 0.05      | 0.00                                                 |
| MECP2 (Mult = 3)         | 2.51 | 0.54                  | -0.53               | -0.18 | -0.32     | -0.02     | 0.00                                                 |

**Table S10.** Mulliken spin density distribution for the hydroxylation reaction of xanthene cation by [(TF<sub>4</sub>TMAP)(CH<sub>3</sub>CN)Mn<sup>III</sup>OH]<sup>4+</sup> (**2**).

|                                       | Mn   | CH <sub>3</sub> CN | O    | 4xN   | Substrate | Porphyrin | 4 x C <sub>6</sub> F <sub>4</sub> N(Me) <sub>3</sub> |
|---------------------------------------|------|--------------------|------|-------|-----------|-----------|------------------------------------------------------|
| Mn <sup>III</sup> OH + C <sup>+</sup> | 1.97 | -0.01              | 0.07 | -0.16 | 0.01      | 0.11      | 0.00                                                 |
| Intermediate                          | 1.99 | -0.01              | 0.06 | -0.15 | 0.01      | 0.10      | 0.00                                                 |
| TS <sub>reb</sub>                     | 2.01 | -0.01              | 0.03 | -0.16 | 0.01      | 0.12      | 0.00                                                 |
| Product                               | 2.03 | -0.01              | 0.00 | -0.16 | 0.00      | 0.14      | 0.00                                                 |

**Table S11.** Selected geometries for the [(Por)OMn<sup>V</sup>O]<sup>-</sup> species in different spin states, in Å.<sup>a</sup>

| Multiplicity | Mn-O <sup>1</sup> | Mn-O <sup>2</sup> | Mn-N <sup>1</sup> | Mn-N <sup>2</sup> | Mn-N <sup>3</sup> | Mn-N <sup>4</sup> |
|--------------|-------------------|-------------------|-------------------|-------------------|-------------------|-------------------|
| <b>1</b>     | <b>1.65</b>       | <b>1.65</b>       | <b>2.06</b>       | <b>2.06</b>       | <b>2.06</b>       | <b>2.06</b>       |
| <b>3 (a)</b> | <b>1.72</b>       | <b>1.95</b>       | <b>2.05</b>       | <b>2.04</b>       | <b>2.05</b>       | <b>2.04</b>       |
| 3 (b)        | 1.65              | 1.65              | 2.07              | 2.07              | 2.07              | 2.07              |
| 3 (c)        | 1.75              | 1.75              | 2.05              | 2.05              | 2.05              | 2.05              |
| 3 (d)        | 1.80              | 1.80              | 2.06              | 2.04              | 2.06              | 2.04              |
| 3 (e)        | 1.72              | 1.94              | 2.04              | 2.05              | 2.04              | 2.05              |
| 5 (a)        | 1.72              | 1.93              | 2.06              | 2.05              | 2.06              | 2.05              |
| <b>5 (b)</b> | <b>1.72</b>       | <b>1.99</b>       | <b>2.04</b>       | <b>2.05</b>       | <b>2.04</b>       | <b>2.05</b>       |

<sup>a</sup> The energetically lowest configuration in each spin state is marked in bold.

**Table S12.** Selected geometries for the [(Por)OMn<sup>IV</sup>OH]<sup>-</sup> species, in Å and °.

| Multiplicity | Mn-O | Mn-OH | Mn-N <sup>1</sup> | Mn-N <sup>2</sup> | Mn-N <sup>3</sup> | Mn-N <sup>4</sup> | O-H  | Mn-O-H |
|--------------|------|-------|-------------------|-------------------|-------------------|-------------------|------|--------|
| 2            | 1.74 | 1.92  | 2.05              | 2.05              | 2.05              | 2.05              | 0.98 | 110.25 |
| 4            | 1.72 | 1.99  | 2.04              | 2.05              | 2.05              | 2.05              | 0.98 | 109.35 |

**Table S13.** Selected geometries for the C-H activation reaction of xanthene by [(TF<sub>4</sub>TMAP)OMn<sup>V</sup>O]<sup>3+</sup> (**1**), in Å and °.

|                          | Mn-O <sub>inactive</sub> | Mn-O <sub>active</sub> | O <sub>active</sub> -H <sub>subs</sub> | H <sub>subs</sub> -C <sub>subs</sub> | O <sub>active</sub> -C <sub>subs</sub> | Mn-O <sub>active</sub> -H <sub>subs</sub> | Mn-O <sub>active</sub> -C <sub>subs</sub> |
|--------------------------|--------------------------|------------------------|----------------------------------------|--------------------------------------|----------------------------------------|-------------------------------------------|-------------------------------------------|
| <b>Mult = 1</b>          |                          |                        |                                        |                                      |                                        |                                           |                                           |
| Reactant                 | 1.65                     | 1.65                   | 2.31                                   | 1.10                                 | 3.41                                   | 145.94                                    | 146.03                                    |
| TS                       | 1.73                     | 1.82                   | 1.38                                   | 1.22                                 | 2.60                                   | 125.71                                    | 127.17                                    |
| Intermediate             | 1.74                     | 1.91                   | 0.98                                   | 4.62                                 | 4.27                                   | 112.57                                    | 142.01                                    |
| Mn <sup>IV</sup> OH + C• | 1.74                     | 1.90                   | 0.98                                   | ----                                 | ----                                   | 112.61                                    | ----                                      |
| TS <sub>reb</sub>        | 1.73                     | 1.98                   | 0.98                                   | 2.52                                 | 2.22                                   | 109.99                                    | 137.79                                    |
| Product                  | 1.63                     | 2.30                   | 0.98                                   | 2.07                                 | 1.50                                   | 108.31                                    | 139.49                                    |
| <b>Mult = 3 (a)</b>      |                          |                        |                                        |                                      |                                        |                                           |                                           |
| Reactant                 | 1.71                     | 1.94                   | 2.21                                   | 1.10                                 | 3.31                                   | 136.48                                    | 137.24                                    |
| TS                       | 1.71                     | 1.95                   | 1.40                                   | 1.21                                 | 2.61                                   | 124.16                                    | 125.37                                    |
| Intermediate             | 1.71                     | 1.98                   | 0.98                                   | 3.38                                 | 3.24                                   | 111.63                                    | 157.04                                    |
| Mn <sup>IV</sup> OH + C• | 1.71                     | 1.97                   | 0.98                                   | ----                                 | ----                                   | 111.50                                    | ----                                      |
| TS <sub>reb</sub>        | 1.70                     | 2.03                   | 0.98                                   | 2.59                                 | 2.31                                   | 110.83                                    | 137.93                                    |
| Product                  | 1.68                     | 2.28                   | 0.98                                   | 2.08                                 | 1.51                                   | 110.12                                    | 138.11                                    |
| <b>Mult = 3 (b)</b>      |                          |                        |                                        |                                      |                                        |                                           |                                           |
| Reactant                 | 1.72                     | 1.94                   | 2.26                                   | 1.10                                 | 3.36                                   | 143.27                                    | 143.18                                    |
| TS                       | 1.71                     | 1.94                   | 1.46                                   | 1.19                                 | 2.65                                   | 124.14                                    | 125.90                                    |
| Intermediate             | 1.74                     | 1.90                   | 0.98                                   | 2.77                                 | 3.63                                   | 113.98                                    | 135.08                                    |
| Mn <sup>IV</sup> OH + C• | 1.74                     | 1.90                   | 0.98                                   | ----                                 | ----                                   | 112.61                                    | ----                                      |
| TS <sub>reb</sub>        | 1.69                     | 2.00                   | 0.98                                   | 2.57                                 | 2.41                                   | 110.03                                    | 134.61                                    |
| Product                  | 1.72                     | 2.32                   | 0.98                                   | 2.07                                 | 1.50                                   | 108.37                                    | 139.88                                    |
| <b>Mult = 5</b>          |                          |                        |                                        |                                      |                                        |                                           |                                           |
| Reactant                 | 1.72                     | 1.98                   | 2.20                                   | 1.10                                 | 3.30                                   | 135.87                                    | 136.72                                    |
| TS                       | 1.72                     | 1.98                   | 1.42                                   | 1.20                                 | 2.62                                   | 124.54                                    | 125.77                                    |
| Intermediate             | 1.71                     | 1.98                   | 0.98                                   | 3.41                                 | 3.25                                   | 111.48                                    | 157.74                                    |
| Mn <sup>IV</sup> OH + C• | 1.71                     | 1.97                   | 0.98                                   | ----                                 | ----                                   | 111.50                                    | ----                                      |
| TS <sub>reb</sub>        | 1.70                     | 2.04                   | 0.98                                   | 2.59                                 | 2.31                                   | 110.11                                    | 141.16                                    |
| Product                  | 1.67                     | 2.26                   | 0.98                                   | 2.08                                 | 1.51                                   | 108.96                                    | 138.63                                    |

**Table S14.** Selected geometries for the hydroxylation reaction of xanthene cation by [(TF<sub>4</sub>TMAP)(CH<sub>3</sub>CN)Mn<sup>III</sup>OH]<sup>4+</sup> (**2**), in Å and °.

|                      | Mn-NCCH <sub>3</sub> | Mn-O | O-H <sub>subs</sub> | H <sub>subs</sub> -C <sub>subs</sub> | O <sub>active</sub> -C <sub>subs</sub> | Mn-O <sub>active</sub> -H <sub>subs</sub> | Mn-O <sub>active</sub> -C <sub>subs</sub> |
|----------------------|----------------------|------|---------------------|--------------------------------------|----------------------------------------|-------------------------------------------|-------------------------------------------|
| Mn <sup>III</sup> OH | 2.15                 | 1.82 | 0.98                | ----                                 | ----                                   | 113.49                                    | ----                                      |
| Intermediate         | 2.13                 | 1.83 | 0.98                | 3.45                                 | 3.02                                   | 113.57                                    | 137.91                                    |
| TS <sub>reb</sub>    | 2.09                 | 1.88 | 0.98                | 2.48                                 | 2.05                                   | 112.03                                    | 141.86                                    |
| Product              | 2.00                 | 1.98 | 0.98                | 2.12                                 | 1.56                                   | 111.01                                    | 137.92                                    |

# Coordinates

Coordinates are given in xyz-file format, with system total charge/multiplicity given within parenthesis in the comment line.

## Xanthene(•)(+)

24

(0/1) Xanthene  
C 2.00460 4.69149 -4.48259  
C 1.45833 5.16586 -5.69468  
C 0.77631 4.28213 -6.54748  
C 0.64667 2.93115 -6.18016  
C 1.86165 3.33568 -4.13749  
C 1.18098 2.42907 -4.97744  
O -0.05245 2.11506 -7.09612  
C -0.22895 0.74473 -6.80499  
C 1.03387 0.96479 -4.59320  
C 0.26882 0.15334 -5.62740  
C -0.93611 0.00546 -7.76949  
C -1.15812 -1.36580 -7.56038  
C -0.67169 -1.98592 -6.38924  
C 0.03304 -1.22503 -5.43949  
H -1.29894 0.50840 -8.66105  
H -1.70385 -1.94356 -8.30148  
H -0.84028 -3.04602 -6.22133  
H 0.40864 -1.70219 -4.53636  
H 0.52751 0.88967 -3.62004  
H 0.20976 0.52308 -4.44418  
H 0.34638 4.61936 -7.48606  
H 1.56254 6.21135 -5.97204  
H 2.53333 5.36963 -3.81852  
H 2.28273 2.96915 -3.20328

23

(0/2) Xanthene (-H) radical  
C 0.39364 5.22775 -4.67081  
C -0.47236 5.45642 -5.78909  
C -0.65668 4.23122 -6.46152  
C 0.02439 3.09708 -6.00944  
C 1.07083 4.38518 -4.22663  
C 0.90664 3.12975 -4.88470  
O -0.19485 1.89874 -6.71726  
C 0.45643 0.71447 -6.31904  
C 1.57029 1.92802 -4.47888  
C 1.34529 0.71143 -5.19915  
C 0.18895 -0.43564 -7.06754  
C 0.81501 -1.64746 -6.71156  
C 1.70211 -1.68948 -5.60840  
C 1.96259 -0.53107 -4.86562  
H -0.49469 -0.37862 -7.90922  
H 0.61421 -2.54709 -7.28627  
H 2.18217 -2.62591 -5.33760  
H 2.64321 -0.56368 -4.01811  
H 2.24235 1.93866 -3.62601  
H -1.31515 4.15202 -7.32128  
H -0.99656 6.34378 -6.13220  
H 0.53273 6.47442 -4.15569  
H 1.73574 4.44022 -3.36788

23

(1/1) Xanthene (-H) cation  
C 0.40896 5.49996 -4.66018  
C -0.46233 5.42251 -5.78911  
C -0.66300 4.22067 -6.47559  
C 0.01902 3.08141 -6.02365  
C 1.08145 4.36982 -4.21692  
C 0.90284 3.11947 -4.89282  
O -0.18403 1.89924 -6.70529  
C 0.44445 0.73024 -6.32845  
C 1.55191 1.92778 -4.50278  
C 1.33823 0.72158 -5.20496  
C 0.17688 -0.42524 -7.07723  
C 0.81180 -1.61352 -6.70201  
C 1.70816 -1.66138 -5.59123  
C 1.96911 -0.51549 -4.85321  
H -0.50441 -0.38085 -7.91927  
H 0.61858 -2.51980 -7.26798  
H 2.18257 -2.60115 -5.32987  
H 2.64779 -0.53781 -4.00589  
H 2.22447 1.93849 -3.64883  
H -1.32257 4.15372 -7.33329  
H -0.98083 6.31649 -6.12218  
H 0.54019 6.44974 -4.15304  
H 1.74705 4.41423 -3.36010

## [(Por)OMn<sup>VO</sup>]

39

(-1/1)  
Mn -0.00280 -0.00291 -0.14704  
O -0.02636 -0.02324 1.50222  
O 0.01929 0.01792 -1.79632  
N 1.11283 1.72598 -0.11130  
N -1.73208 1.11320 -0.15666  
N -1.11884 -1.73174 -0.18285  
N 1.72591 -1.11877 -0.13740  
C 2.49606 1.81199 -0.09423  
C 2.89392 3.21701 -0.07502  
C 1.73633 3.96365 -0.08093  
C 0.62060 3.02178 -0.10411  
H 1.63253 5.04111 -0.07130  
H 3.91807 3.56715 -0.09596  
C 3.38364 0.72716 -0.09562  
C -3.02779 0.62123 -0.17855  
C -3.96976 1.73715 -0.17650  
C -3.22321 2.89458 -0.15348  
C -1.81817 2.49641 -0.14125  
C -0.73346 3.38383 -0.11731  
H -5.04719 1.63355 -0.19063  
H -0.62672 -3.02755 -0.19017  
C -1.74250 -3.96936 -0.21385  
C -2.90002 -3.22262 -0.22024  
C -2.50207 -1.81762 -0.20031  
C -3.38967 -0.73280 -0.19872  
H -3.92420 -3.57268 -0.23625  
H -1.63878 -5.04683 -0.22364  
C 3.02166 -0.62684 -0.11535  
C 3.96355 -1.74278 -0.11650  
C 3.21698 -2.90019 -0.13934  
C 1.81197 -2.50203 -0.15242  
C 0.72735 -3.38953 -0.17659  
H 5.06714 -3.24443 -0.14701  
H 5.04098 -1.63920 -0.10195  
H -0.96251 4.44621 -0.10837  
H -4.45196 -0.96170 -0.21403  
H 0.95649 -4.45183 -0.18535  
H 4.44589 0.95600 -0.08044

39

(-1/3) Species a  
Mn -0.00435 -0.00385 -0.05635  
O 0.02129 0.01888 -2.00218  
N 1.10620 1.71698 -0.08425  
N -1.71551 1.10257 -0.17294  
N -1.11302 -1.72328 -0.15271  
N 1.70975 -1.10786 -0.15499  
C 2.49146 1.80794 -0.07305  
C 2.88895 3.21082 -0.05292  
C 1.73280 3.95702 -0.05922  
C 0.61849 3.01693 -0.08343  
H 1.62692 5.03400 -0.05325  
H 3.91377 3.55824 -0.04079  
C 3.38031 0.72898 -0.09453  
C -3.01731 0.61430 -0.19482  
C -3.95478 1.72845 -0.20346  
C -3.20845 2.88522 -0.18016  
C -1.80707 2.48897 -0.15738  
C -0.73069 3.38192 -0.11638  
H -3.55673 3.90977 -0.17675  
H -5.03165 1.62337 -0.22270  
C -0.62517 -3.02309 -0.16807  
C -1.73949 -3.96317 -0.19195  
C -2.89562 -3.21694 -0.19829  
C -2.49810 -1.81408 -0.17805  
C -3.38646 -0.73467 -0.19747  
H -3.92035 -3.56425 -0.21871  
H -1.63350 -5.04006 -0.20610  
C 3.01158 -0.61958 -0.13238  
C 3.94299 -1.73350 -0.14359  
C 3.20296 -2.89028 -0.16652  
C 1.80134 -2.49520 -0.16959  
C 0.72451 -3.38764 -0.17567  
H 3.55137 -3.91472 -0.17869  
H 5.02627 -1.62833 -0.13340  
H -0.96221 4.44312 -0.11184  
H -4.44854 -0.96127 -0.21771  
H 0.95611 -4.44875 -0.18905  
H 4.44250 0.95566 -0.08313

39

(-1/3) Species b

Mn -0.00303 -0.00283 -0.14703  
O -0.02579 -0.02331 1.50545  
O 0.01952 0.01771 -1.79951  
N 1.12232 1.73185 -0.11125  
N -1.74319 1.11453 -0.15663  
N -1.12846 -1.73751 -0.18281  
N 1.73701 -1.12015 -0.13742  
C 2.49641 1.82905 -0.09386  
C 2.89407 3.22646 -0.07408  
C 1.72777 3.97674 -0.08081  
C 0.62450 3.04326 -0.10383  
H 1.62660 5.05455 -0.07119  
H 3.91720 3.57858 -0.05811  
C 3.39281 0.72906 -0.09535  
C -3.03528 0.63656 -0.17838  
C -3.97390 1.74582 -0.17693  
C -3.22087 2.90998 -0.15383  
C -1.83055 2.51424 -0.14125  
C -0.73433 3.38734 -0.11736  
H -5.04345 1.60441 -0.14596  
H -5.05122 1.64454 -0.19129  
C -0.63067 3.04893 -0.19021  
C -1.73394 -3.98239 -0.21375  
C -2.90024 -3.23210 -0.21959  
C -2.50255 -1.83468 -0.20021  
C -3.98996 0.73469 -0.19867  
H -3.92338 -3.58420 -0.23525  
H -1.63279 -5.06019 -0.22371  
C 3.02912 -0.64218 -0.11564  
C 3.96772 -1.75145 -0.11683  
C 3.21468 -2.91560 -0.14035  
C 1.82437 -2.51986 -0.15273  
C 0.72816 -3.39299 -0.17661  
H 3.56728 -3.93909 -0.14835  
H 5.04504 -1.65018 -0.10227  
H -0.96384 4.45121 -0.10857  
H -4.46114 -0.96355 -0.21399  
H 0.95771 -4.45685 -0.18552  
H 4.44500 0.95790 -0.07989

39

(-1/3) Species c  
Mn -0.00308 -0.00283 -0.14708  
O -0.02589 -0.02309 1.60196  
O 0.01970 0.01753 -1.89602  
N 1.12854 1.78088 -0.11304  
N -1.73892 1.08983 -0.15637  
N -1.13471 -1.71372 -0.18100  
N 1.73275 -1.09547 -0.13768  
C 2.51256 1.81076 -0.09456  
C 2.89834 3.21801 -0.07373  
C 1.73387 3.95354 -0.08102  
C 0.62700 3.00180 -0.10494  
H 1.61937 5.02995 -0.07111  
H 3.91937 3.57005 -0.05688  
C 3.40581 0.73208 -0.09545  
C -3.04237 0.61302 -0.17849  
C -3.97398 1.73612 -0.17712  
C -3.21628 2.86867 -0.15415  
C -1.81528 2.47506 -0.14132  
C -0.72811 3.35918 -0.11773  
H -3.55607 3.91384 -0.14632  
H -5.05226 1.64214 -0.19165  
C -0.63317 -3.00744 -0.18907  
C -1.74003 -3.95917 -0.21391  
C -2.90452 -3.22366 -0.21938  
C -2.51873 -1.81640 -0.19947  
C -3.41198 -0.73772 -0.19853  
H -3.92556 -3.58270 -0.23553  
H 1.62552 -5.03558 -0.22448  
C 0.63260 -0.61866 -0.11553  
C 3.96781 -1.74176 -0.11641  
C 3.21012 -2.89170 -0.14039  
C 1.80911 -2.48070 -0.15270  
C 0.72194 -3.36483 -0.17633  
H 5.04634 -1.61488 -0.14858  
H 5.04608 -1.64779 -0.10150  
H -0.95757 4.42159 -0.10870  
H -4.47412 -0.96653 -0.21435  
H 0.95141 -4.42723 -0.18566  
H 4.46797 0.96088 -0.07933

39

(-1/3) Species d

Mn -0.00309 -0.00282 -0.14716  
O -0.04564 -0.03529 1.65129  
O 0.03954 0.02967 -1.94534  
N 1.10521 1.72877 -0.10651  
N -1.72413 1.09435 -0.15743  
N -1.11138 -1.73439 -0.18765  
N 1.71796 -1.10000 -0.13655  
C 2.48851 1.82790 -0.09029  
C 2.88151 3.23455 -0.07181  
C 1.72035 3.97467 -0.07886  
C 0.61127 3.02466 -0.10095  
H 1.61000 5.05151 -0.06995  
H 3.90402 3.58955 -0.05579  
C 3.37984 0.74726 -0.09317  
C -3.02352 0.60030 -0.17952  
C -3.96645 1.71149 -0.17847  
C -3.22370 2.87186 -0.15380  
C -1.81969 2.48090 -0.14162  
C -0.74397 3.37800 -0.11643  
H -3.57765 3.89471 -0.14486  
H -5.04345 1.60441 -0.19445  
C -0.61744 -3.03029 -0.19317  
C -1.72652 -3.98030 -0.21526  
C -2.88768 -3.24018 -0.22232  
C -2.49468 -1.83354 -0.20384  
C -3.38602 -0.75290 -0.20088  
H -3.91019 -3.59519 -0.23832  
H -1.61617 -5.05715 -0.22415  
C 3.01734 -0.60594 -0.11445  
C 3.96028 -1.71713 -0.11544  
C 3.21753 -2.87750 -0.14008  
C 1.81352 -2.48654 -0.15232  
C 0.73779 -3.38364 -0.17759  
H 3.57148 -3.90035 -0.14897  
H 5.03727 -1.61004 -0.09943  
H -0.98297 4.43817 -0.10867  
H -4.44824 -0.98208 -0.21536  
H 0.97679 -4.44381 -0.18532  
H 4.44206 0.97644 -0.07867

39

(-1/5) Species a

Mn -0.00466 -0.00400 -0.03625

O -0.02831 -0.02398 1.68101  
O 0.02229 0.01944 -1.96580  
N 1.11238 1.72683 -0.06727  
N -1.72061 1.10573 -0.16842  
N -1.11970 -1.73346 -0.13665  
N 1.71472 -1.11121 -0.15009  
C 2.49944 1.82483 -0.06170  
C 2.89704 3.20323 -0.05178  
C 1.72262 3.96133 -0.05929  
C 0.63047 3.03136 -0.07291  
H 1.62107 5.03667 -0.06063  
H 3.92052 3.55455 -0.04614  
C 3.38932 0.71568 -0.08397  
C -3.02979 0.61972 -0.19643  
C -3.96693 1.73919 -0.22320  
C -3.22291 2.89233 -0.20084  
C -1.81717 2.49896 -0.15968  
C -0.74659 3.38477 -0.10755  
H -3.57058 3.91695 -0.20988  
H -5.04340 1.63390 -0.25410  
C -0.63741 -3.03773 -0.15829  
C -1.72930 -3.96750 -0.19150  
C -2.90377 -3.20946 -0.19673  
C -2.50644 -1.83128 -0.16764  
C -3.39580 -0.72167 -0.18733  
H -3.92699 -3.56058 -0.22315  
H -1.62743 -5.04462 -0.21262  
C 3.02406 -0.62505 -0.13348  
C 3.96192 -1.74382 -0.16327  
C 3.21793 -2.89696 -0.18725  
C 1.81449 -2.50430 -0.17190  
C 0.74013 -3.39073 -0.16673  
H 3.56607 -3.92115 -0.21219  
H 5.03880 -1.63819 -0.16485  
H -0.97947 4.44638 -0.10379  
H -4.45881 -0.94723 -0.20760  
H 0.97303 -4.45226 -0.18111  
H 4.45243 0.94138 -0.07256

39

(-1/5) Species b

Mn -0.00443 -0.00416 -0.03757  
O -0.02681 -0.02168 1.68142  
O 0.02707 -0.02337 1.68732  
O 0.02286 0.01486 -1.97543  
N 1.09883 1.70500 -0.13806  
N -1.72449 1.10701 -0.11248  
N -1.10444 -1.71008 -0.20376  
N 1.71723 -1.11358 -0.09258  
C 2.48705 1.79777 -0.12373  
C 2.88196 3.19897 -0.12410  
C 1.72525 3.95450 -0.12911  
C 0.61135 3.00830 -0.13190  
H 1.61978 5.02237 -0.12786  
H 3.90659 3.54690 -0.11790  
C 3.38096 0.72305 -0.09509  
C -3.02439 0.62025 -0.14399  
C -3.96497 1.73423 -0.13778  
C -3.21899 2.89028 -0.11271  
C -1.81630 2.49226 -0.10408  
C -0.73643 3.37982 -0.11316  
H -3.56636 3.91517 -0.10733  
H -5.04181 1.62841 -0.15663  
C -0.61689 -3.01332 -0.21478  
C -1.73025 -3.94990 -0.26170  
C -2.88691 -3.20340 -0.26962  
C -2.49254 -1.80267 -0.22770  
C -3.38719 -0.72859 -0.19806  
H -3.91127 -3.55108 -0.29733  
H -1.62462 -5.02667 -0.28172  
C 3.01732 -0.62655 -0.08086  
C 3.95781 -1.74065 -0.07834  
C 3.21176 -2.89673 -0.09935  
C 1.80915 -2.49858 -0.11511  
C 0.73014 -3.38546 -0.17131  
H 3.55917 -3.92156 -0.11058  
H 5.03475 -1.63467 -0.06888  
H -0.96121 4.44245 -0.10921  
H -4.44774 -0.96174 -0.22157  
H 0.95518 -4.44792 -0.18652  
H 4.44171 0.95636 -0.08662

## 1 + xanthene

151

(3/1) Reactants

Mn -0.23970 1.7766 0.01356  
O -0.05490 -0.23786 1.59594  
O -0.43633 0.59830 -1.56860  
N 1.12248 1.70008 0.25111  
N -1.76355 1.46018 0.53273  
N -1.60311 -1.34461 -0.22499  
N 1.28174 -1.10382 -0.50549  
C 2.49173 1.61782 0.06179  
C 3.10076 2.91955 0.32697  
C 2.08595 3.77379 0.67175  
C 0.84448 3.00365 0.62540  
H 2.17135 4.82027 0.92688  
H 4.15451 3.14935 0.26114  
C 3.19942 0.46488 -0.32356  
C -3.10897 1.14684 0.62441  
C -3.85881 2.32981 1.04257  
C -2.95168 3.34567 1.19530  
C 1.15359 2.79604 0.87257  
C -0.43131 3.52166 0.91496  
H -3.15344 4.36107 1.50472  
H -4.92606 2.37641 1.20480  
C -1.32682 -0.26562 -0.60921  
C -2.56827 -3.41552 -0.65668  
C -3.58148 -2.56390 -0.30135  
C -2.97149 -1.26362 -0.02945  
C -3.67885 -0.11257 0.36369  
H -4.63485 -2.79475 -0.23362  
H -2.65446 -4.46007 -0.91939  
C 2.62853 -0.79332 -0.58790  
C 3.37812 -1.97617 -1.00608  
C 2.46943 -2.98883 -1.17036  
C 1.15359 2.43794 -0.85269  
C -0.05163 -3.16216 -0.90273  
H 2.67075 -0.40310 -1.48369  
H 4.44631 -0.202517 -1.16113  
C -0.51413 4.96739 1.30163  
C -5.16508 -0.24042 0.51392  
C 0.03130 -4.60493 -1.30048  
C 4.68775 0.58330 -0.46015  
C 5.56728 0.20088 0.56091  
C 6.95257 0.30469 0.43510  
C 7.56855 0.80022 -0.73460  
C 6.69084 1.19080 -1.76429  
C 5.30110 1.07914 -1.61402  
F 5.06010 -0.29663 1.74929  
F 7.71984 -0.10244 1.52013  
N 9.06882 0.87125 -0.80331  
F 7.13003 1.69889 -2.97587  
F 4.51279 1.48138 -2.68116  
C 9.62501 1.41107 -2.13600  
C 9.59341 1.81364 0.30537  
C 9.65866 -0.54807 -0.62638  
H 10.74269 -0.46512 -0.70958  
H 9.38934 -0.93792 0.35206  
H 9.26131 -1.18207 -1.41983  
H 10.68007 1.84683 0.21941  
H 9.16673 2.80374 0.14092  
H 9.30859 1.42627 1.28068  
H 10.71059 1.40590 -2.03766  
H 9.32132 0.75762 -2.95158  
H 9.26962 2.42650 -2.29653  
C 0.41594 -5.60856 -0.40628  
C 0.50326 -6.96365 -0.75591  
C 0.20061 -7.40166 -2.05938  
C -0.18479 -6.39091 -2.96652  
C -0.26510 -5.04861 -2.59578  
F 0.72542 -5.26986 0.90112  
F 0.89835 -7.82542 0.25392  
F -0.50184 -6.70553 -4.28257  
F -0.64426 -4.13163 -3.56309  
N 0.25797 -8.82973 -2.52739  
C 0.68864 -9.84498 -1.44931  
C -1.14561 -9.27067 -3.00646  
C 1.28275 -8.95259 -3.68002  
H 0.68058 -10.82213 -1.93258  
H 1.69237 -9.60959 -1.10128  
H -0.02221 -9.83061 -0.62569  
H 1.33204 -10.00405 -3.96443  
H 0.95583 -8.35252 -4.52569  
H 2.25096 -8.61044 -3.31299  
H -1.07329 -10.31255 -3.32021  
H -1.83768 -9.17167 -2.16924  
H -1.45885 -8.65131 -3.84340  
C -5.76318 -0.76866 1.66525  
C -7.14556 -0.89680 1.79987  
C -8.04274 -0.50684 0.78271  
C -7.44922 0.02873 -0.37670  
C -6.05682 0.15111 -0.48906  
F -4.96793 -1.18087 2.72125  
F -7.61839 -1.43856 2.99009  
N -9.52025 -0.69008 0.99245  
F -8.18390 0.45788 -1.47000

F -5.56015 0.68044 -1.66927  
C -10.39561 -0.23088 -0.19067  
C -9.82524 -2.19181 1.20528  
C -9.97590 0.13118 2.22128  
H -11.42913 -0.40963 0.10601  
H -10.23802 0.83010 -0.37270  
H -10.15371 -0.81976 -1.07348  
H -10.90497 -2.29443 1.31901  
H -9.47973 -2.73545 0.32518  
H -9.32048 -2.54471 2.10137  
H -11.04773 -0.02865 2.34272  
H -9.44704 -0.20992 3.10781  
H -9.76647 1.18322 2.02450  
C -0.20662 5.42203 2.59068  
C -0.28528 6.76754 2.95019  
C -0.67890 7.77036 2.03783  
C -0.99270 7.32104 0.74088  
C -0.90752 5.96303 0.40225  
F 0.18274 4.51432 3.56134  
F 0.04201 7.09373 4.26101  
N -0.73286 9.20235 2.49422  
F -1.39683 8.17397 -0.27301  
F -1.22755 5.61320 -0.89975  
C -1.16959 10.20833 1.40995  
C -1.75017 9.33472 3.65239  
C 0.67368 9.64757 2.96071  
H -1.80026 10.38892 3.92631  
H -2.72005 9.88620 3.29576  
H -1.41585 8.74402 4.50181  
H -1.15695 11.18985 1.88415  
H -0.46422 10.18508 0.58179  
H -2.17589 9.97129 1.07066  
H 0.60295 10.69192 3.26657  
H 0.99253 9.03510 3.80054  
H 1.06255 9.54213 2.11997  
C 1.97590 4.69760 -4.46753  
C 1.43977 5.17040 -5.68461  
C 0.78252 4.28059 -6.55085  
C 0.66890 2.92607 -6.19170  
C 1.84954 3.33781 -4.13116  
C 1.19485 2.42454 -4.98486  
O -0.00470 2.10359 -7.12195  
C -0.20523 0.73864 -6.81805  
C 1.07025 0.95561 -4.61224  
C 0.28362 0.15091 -5.63467  
C -0.92577 0.00300 -7.77515  
C -1.17350 -1.36199 -7.55185  
C -0.70138 -1.97768 -6.37269  
C 0.01777 -1.21984 -5.43102  
H -1.27956 0.50336 -8.67188  
H -1.72951 -1.93706 -8.28749  
H -0.89140 -3.03175 -6.19076  
H 0.38145 -1.69507 -4.52231  
H 0.59343 0.86201 -3.62509  
H 0.20723 0.52214 -4.50306  
H 0.35959 4.61628 -7.49322  
H 1.53158 6.21886 -5.95532  
H 2.48528 5.38018 -3.79276  
H 2.26516 2.97267 -3.19428

151

(3/1) C-H Transition State  
Mn -0.25743 0.20037 -0.20840  
O -0.06712 -0.22804 1.46044  
O -0.62016 0.63241 -1.93562  
N 1.10525 1.71069 -0.01247  
N -1.76977 1.49259 0.31901  
N -1.63407 -1.31353 -0.41040  
N 1.23875 -1.08407 -0.74554  
C 2.47790 1.61890 -0.19032  
C 3.09898 2.91094 0.08367  
C 2.09109 3.77326 0.42972  
C 0.84328 3.01634 0.37625  
H 2.18738 4.81785 0.68827  
H 4.15508 3.13111 0.02284  
C 3.17752 0.45888 -0.56772  
C -3.11667 1.18958 0.43363  
C -3.85609 2.37756 0.85637  
C -2.94190 3.38884 0.99403  
C -1.63465 2.83008 0.65333  
C -0.42411 3.54612 0.68446  
H -3.13442 4.40544 1.30525  
H -4.92077 2.42966 1.03357  
C -1.37330 -2.62267 -0.78095  
C -2.61798 -3.38937 -0.79363  
C -3.62104 -2.52785 -0.43532  
C -2.99953 -1.22699 -0.19359  
C -3.66989 -0.06910 0.19572  
H -4.67398 -2.75308 -0.34554  
H -2.71421 -4.43808 -1.03492  
C 2.59220 -0.79295 -0.82844  
C 3.33007 -1.98552 -1.23332  
C 2.41134 -2.99180 -1.38376

C 1.10252 -2.42621 -1.06856  
C -0.10498 3.14928 -1.08778  
H 2.60383 -4.01048 -1.68788  
H 4.39745 -2.04583 -1.39028  
C -0.48302 4.98313 1.10590  
C -5.18150 -0.89221 0.36680  
C -0.03661 -4.60030 -1.45556  
C 4.67006 0.55655 -0.67421  
C 5.52108 0.16736 0.36869  
C 6.91014 0.25490 0.27613  
C 7.56037 0.73767 -0.88048  
C 6.71183 1.13427 -1.93201  
C 5.31774 1.04061 -1.81393  
F 4.98002 -0.31862 1.54683  
F 7.64628 -0.15413 1.38195  
N 9.06255 0.79158 -0.91395  
F 7.18488 1.63181 -3.13516  
F 4.56147 1.44951 -2.90173  
C 9.65508 1.31286 -2.23826  
C 9.57174 1.73706 0.19931  
C 9.63320 -0.63195 -0.71013  
H 10.71971 -0.56020 -0.76687  
H 9.33604 -1.01052 0.26465  
H 9.24982 -1.26947 -1.50756  
H 10.66099 1.75026 0.14473  
H 9.16780 2.73276 0.01283  
H 9.25197 1.36516 1.16985  
H 10.73797 1.29708 -2.11539  
H 9.36264 0.65499 -0.35450  
N 9.06255 0.79158 -0.91395  
C 0.43995 -5.57926 -0.57737  
C 0.50575 -6.94253 -0.89858  
C 0.08224 -7.41765 -2.15476  
C -0.39951 -6.43333 -3.04458  
C -0.45523 -5.08219 -2.70328  
F 0.86234 -5.20783 0.68944  
F 1.00051 -7.77398 0.09313  
F -0.84278 -6.78472 -4.31425  
F -0.93683 -4.19692 -3.65326  
N 0.10809 -8.85647 -2.59091  
C 0.66077 -9.83444 -1.53482  
C -1.33261 -9.32293 -2.90890  
C 1.00998 -9.00310 -3.83916  
H 0.61453 -10.82665 -1.98342  
H 1.69264 -9.57823 -1.30248  
H 0.03832 -9.79833 -0.64338  
N 0.10809 -8.85647 -2.59091  
H 0.59860 -8.42059 -4.65981  
H 2.01026 -8.65384 -3.58007  
H -1.28131 -10.37142 -3.20488  
H -1.93294 -9.20980 -2.00543  
H -1.73983 -8.72633 -3.72165  
C -5.76746 -0.70993 1.52778  
C -7.14843 -0.83621 1.67929  
C -8.05668 -0.44789 0.67069  
C -7.57565 0.00808 -0.49811  
C -6.08443 0.19967 -0.62725  
F -4.96101 -1.11861 2.57681  
F -7.60858 -1.36939 2.87765  
N -9.53204 -0.62726 0.89831  
F -8.22224 0.50612 -1.58497  
F -5.60081 0.72143 -1.81631  
C -10.41989 -0.17224 -0.27703  
C -9.83738 -2.12720 1.12222  
C -9.97195 0.20078 2.12824  
H -11.45023 -0.34928 0.03151  
H -10.26372 0.88791 -0.46511  
H -10.18772 -0.74664 -1.16007  
H -10.91583 -2.22727 1.24949  
H -9.50349 -2.67593 0.24083  
H -9.32251 -2.47663 2.01390  
H -11.04344 0.04712 2.25994  
H -9.43676 -0.14022 3.01102  
H -9.75852 1.25100 1.92599  
C -0.08625 5.40604 2.38203  
C -0.12859 4.74269 2.77765  
C -0.57214 7.77055 1.91751  
C -0.98420 7.35321 0.63757  
C -0.93532 6.00285 0.26265  
F 0.35802 4.47339 3.30468  
F 0.28612 7.03438 4.07186  
N -0.57395 9.19275 2.40680  
F -1.45269 8.23177 -0.32570  
C -1.37330 5.68841 -1.02171  
C -1.05619 10.22828 1.37071  
C -1.51579 9.31844 3.62745  
C 0.86573 9.60647 2.79574  
H -1.51153 10.36349 3.93928  
H -2.51755 9.01685 3.31880  
H -1.15398 8.68708 4.35556  
H -0.98823 11.20057 1.85888  
H -0.40668 10.20295 0.49801  
H -2.08801 10.02068 1.09469

H 0.82921 10.64410 3.12919  
H 1.22589 8.97036 3.60040  
H 1.49870 9.51112 1.91266  
C 0.84429 5.03528 -3.89465  
C 0.00460 5.22709 -5.01449  
C -0.44401 4.11839 -5.75300  
C -0.05387 2.82995 -5.35514  
C 1.21842 3.73627 -3.51268  
C 0.77133 2.60303 -4.23005  
O -0.52828 1.76172 -6.14670  
C 0.05380 0.48577 -5.98675  
C 1.09509 1.20550 -3.80593  
C 0.88163 0.18677 -4.88027  
C -0.23291 -0.45682 -6.98659  
C 0.32709 -1.74285 -6.89479  
C 1.17285 -2.06795 -5.81083  
C 1.44163 -1.10996 -4.81916  
H -0.87461 -0.17559 -7.81625  
H 0.11231 -2.48068 -7.66304  
H 1.61416 -3.05847 -5.74310  
H 2.08935 -1.36294 -3.98313  
H 0.31539 0.92870 -2.90499  
H 2.07163 1.12007 -3.32139  
H -1.07842 4.23760 -6.62623  
H -0.29126 6.22923 -5.31267  
H 1.19917 5.89147 -3.32768  
H 1.86039 3.58999 -2.64735

151

(3/1) Intermediate  
Mn 0.13309 0.09142 1.04550  
O 0.28149 -0.46004 2.68501  
O -0.03553 0.69142 -0.75838  
N 1.45399 1.62279 1.38931  
N -1.41458 1.32083 1.58020  
N -1.19351 -1.40114 0.60082  
N 1.68367 -1.12153 0.47900  
C 2.83183 1.57885 1.23105  
C 3.41468 2.86328 1.60802  
C 2.38024 3.67185 2.00217  
C 1.15431 2.89094 1.86761  
H 2.44407 4.69583 2.34114  
H 4.46446 3.11670 1.57341  
C 3.56925 0.46849 0.78066  
C -2.76339 0.99879 1.57114  
C -3.54665 2.13941 2.03854  
C -2.65914 3.14452 2.32225  
C -1.32437 2.63042 2.02712  
C -0.13437 3.36710 2.16887  
H -2.88801 4.13165 2.69722  
H -4.62190 2.16877 2.14082  
C -0.89030 -2.67750 0.15530  
C -2.11893 -3.45238 -0.00329  
C -3.15738 -2.63022 0.34854  
C -2.57237 -1.34727 0.73171  
C -3.30973 -0.23516 1.17611  
H -4.21062 -2.87173 0.34906  
H -2.18127 -4.48055 -0.32970  
C 3.02742 -0.78213 0.43449  
C 3.81028 -1.92467 -0.02986  
C 2.92627 -2.94424 -0.26799  
C 1.59353 -2.43548 0.04759  
C 0.40266 -3.16966 -0.09968  
H 3.15511 -3.93586 -0.63100  
H 4.88334 -1.94738 -0.15446  
C -0.25319 4.77535 2.66790  
C -4.80173 -0.37525 1.23072  
C 0.52394 -4.58345 -0.58083  
C 0.50419 0.63415 0.65752  
C 5.91944 0.55058 1.75631  
C 7.30006 0.71308 1.63842  
C 7.92595 0.97881 0.40110  
C 7.06380 1.05784 -0.70932  
C 5.67942 0.88957 -0.56654  
F 5.40356 0.28958 3.01464  
F 8.05335 0.59878 2.80102  
N 9.41838 1.15083 0.35099  
F 7.51288 1.30903 -1.99533  
F 4.90726 0.99682 -1.71352  
C 9.98302 1.45389 -1.05166  
C 9.82913 2.33844 1.25368  
C 10.10328 -0.15141 0.82817  
H 11.18094 -0.00080 0.75691  
H 9.82241 -0.35656 1.85846  
H 9.78756 -0.96236 0.17076  
H 10.90950 2.45707 1.16754  
H 9.31623 2.32177 0.89530  
H 9.55877 2.12599 2.28503  
H 11.06062 1.56458 -0.92854  
H 9.76712 0.62365 -1.72091  
H 9.55299 2.37963 -1.42907  
C 9.92162 -5.62974 0.25726  
C 1.05601 -6.95740 -0.17319

C 0.79028 -7.32248 -1.50691  
C 0.38748 -6.26919 -2.35640  
C 0.25890 -4.95546 -1.90564  
F 1.19752 -5.36519 1.58937  
F 1.45909 -7.86804 0.78987  
F 0.10881 -6.50960 -3.69686  
F -0.13073 -3.99230 -2.82200  
N 0.91446 -8.71279 -2.06522  
C 1.35348 -9.77966 -1.04225  
C -0.45523 -9.17416 -2.61626  
C 1.97605 -8.72200 -3.18986  
H 1.38538 -10.72551 -1.58357  
H 2.34273 -9.53550 -0.65952  
H 0.62501 -9.83595 -0.23599  
H 2.05557 -9.74580 -3.55668  
H 1.66325 -8.06114 -3.99466  
H 2.92455 -8.39374 -2.76370  
H -0.32843 -10.18710 -2.99936  
H -1.17323 -9.16316 -1.79556  
H -0.77212 -8.51081 -3.41723  
C -5.46737 -0.95151 2.32004  
C -6.85537 -1.08563 2.36537  
C -7.69008 -0.65089 1.31311  
C -7.02821 -0.06646 0.21604  
C -5.63184 0.05893 0.19316  
F -4.73651 -1.40887 3.40378  
F -7.39857 -1.67254 3.50214  
N -9.17785 -0.83634 1.42668  
F -7.69627 0.41313 -0.89884  
F -5.06566 0.64122 -0.92953  
C -9.98108 -0.33102 0.21132  
C -9.50119 -2.34315 1.56568  
C -9.70340 -0.05901 2.65653  
H -11.02991 -0.52327 0.43751  
H -9.81721 0.73659 0.08058  
H -9.68373 -0.88409 -0.67761  
H -10.58566 -2.44021 1.62840  
H -9.12246 -2.85512 0.68020  
H -9.03956 -2.73621 2.46825  
H -10.78332 -0.20434 2.69882  
H -9.23996 -0.44626 3.56069  
H -9.46565 0.99660 2.51998  
C 0.01357 5.13044 3.99677  
C -0.11113 6.43907 4.64356  
C -0.51169 7.50362 3.62728  
C -0.77818 7.15574 2.28911  
C -0.64744 5.83036 1.84248  
F 0.40322 4.15559 4.90000  
F 0.16966 6.62265 5.80651  
N -0.63328 8.88703 4.20292  
F -1.17898 8.07910 1.33731  
F -0.92403 5.85848 0.50727  
C -1.07236 9.96685 3.19362  
C -1.69363 8.88384 5.32877  
C 0.73772 9.39373 4.75798  
H -1.77172 9.90336 5.70759  
H -2.64288 8.56146 4.89977  
H -1.38051 8.21336 6.12546  
H -1.10240 10.91634 3.74630  
H -0.34479 10.03190 2.38272  
H -0.66246 9.72849 2.80931  
H 0.61234 10.34752 5.15492  
H 1.05526 8.66539 5.49447  
H 1.45443 9.33906 3.93607  
C 2.39231 0.49959 -4.22729  
C 2.83844 0.46676 -5.57064  
C 1.95413 0.04603 -6.59293  
C 0.64094 -0.29722 -6.25832  
C 1.07365 0.15636 -3.89993  
C 0.15719 -0.25729 -4.91382  
O -0.20321 -0.69114 -7.31689  
C -1.53930 -0.15323 -7.05596  
C -1.20032 -0.62746 -6.64688  
C -2.05553 -0.12852 -5.72247  
C -2.31720 -1.43132 -1.84537  
C -3.66111 -1.80469 -7.94903  
C -4.20730 -1.79394 -6.64246  
C -3.41888 -1.41281 -5.54930  
H -1.87614 -1.43192 -9.14664  
H -4.274

O -0.33850 0.91386 -2.09370  
N 1.25867 1.79463 0.00450  
N -1.60183 1.51389 0.25172  
N -1.42241 -1.25254 -0.63168  
N 1.44192 -0.97986 -0.82659  
C 2.64290 1.72509 -0.13915  
C 3.23347 3.01638 0.14985  
C 2.20078 3.86801 0.48078  
C 0.97429 3.09508 0.40233  
H 2.27692 4.91449 0.73893  
H 4.28543 3.25948 0.09744  
C 3.36858 0.56963 -0.51047  
C -2.95845 1.18839 0.30968  
C -3.72565 2.35484 0.73549  
C -2.83424 3.37701 0.92536  
C -1.50459 2.58086 0.61621  
C -0.31717 3.59712 0.69287  
H -3.05441 4.38327 1.25181  
H -4.79705 2.38833 0.87488  
C -1.14185 -2.54859 -1.03194  
C -2.36693 -3.32654 -1.08919  
C -3.39459 -2.48485 -0.71789  
C -2.80008 -1.19612 -0.48289  
C -3.51424 -0.05848 0.00434  
H -4.44667 -2.73118 -0.64694  
H -2.44559 -4.37020 -1.35753  
C 2.80593 -0.66749 -0.84496  
C 3.57029 -1.83843 -1.25954  
C 2.67331 -2.84603 -1.49319  
C 1.34196 -2.31379 -1.20699  
C 0.15437 -3.05808 -1.30380  
H 2.89317 -3.84691 -1.83563  
H 4.64490 -1.88787 -1.36200  
C -0.41979 5.02778 1.11209  
C -4.99948 -0.20705 0.14749  
C 0.26447 -4.49910 -1.67982  
C 4.86339 0.67343 -0.48590  
C 5.57861 0.71933 0.72087  
C 6.96773 0.82672 0.77085  
C 7.76339 0.89620 -0.39361  
C 7.05716 0.84134 -1.60994  
C 5.65889 0.73441 -1.63445  
F 4.89828 0.64107 1.92503  
F 7.55616 0.86226 2.03045  
N 9.25484 1.03216 -0.26063  
F 7.68252 0.89428 -2.84578  
F 5.05682 0.70525 -2.88482  
C 10.01302 1.10518 -1.60083  
C 9.58497 2.33834 0.49946  
C 8.82345 -0.18885 0.49956  
H 10.90542 -0.06469 0.55453  
H 9.40131 -0.22705 1.50078  
H 9.57047 -1.08822 -0.06266  
H 10.67056 2.40787 0.57602  
H 9.18718 3.17516 -0.07579  
H 9.14341 2.30726 1.49258  
H 11.06973 1.20011 -1.35022  
H 9.84519 0.19739 -2.16691  
H 9.68207 1.97736 -2.16081  
C 0.81884 -5.46074 -0.82361  
C 0.93493 -6.81931 -1.14671  
C 0.48354 -7.31832 -2.38399  
C -0.08660 -6.35868 -3.24872  
C -0.18706 -5.01104 -2.90617  
F 1.26766 -5.07630 0.43165  
F 1.50142 -7.62690 -0.17194  
F -0.56770 -6.73345 -4.49942  
F -0.74074 -4.15329 -3.84578  
N 0.56615 -8.75360 -2.82357  
C 1.22702 -9.69637 -1.79886  
C -0.85927 -9.29885 -3.07099  
C 1.40857 -8.85451 -4.11670  
H 1.22975 -10.68801 -2.25114  
H 2.24782 -9.37053 -1.60767  
H 0.64232 -9.70599 -0.88145  
H 1.46151 -9.90843 -4.39224  
H 0.93140 -8.28608 -4.91099  
H 2.40480 -8.46475 -3.90575  
H -0.76434 -10.34137 -3.37728  
H -1.41808 -9.22310 -2.13761  
H -1.34009 -8.72178 -3.85748  
C -5.95551 -0.72540 1.30442  
C -6.97585 -0.87983 1.43385  
C -7.87446 -0.52362 0.40488  
C -7.28389 0.00135 -0.76072  
C -5.89314 0.14699 -0.86751  
F -4.80009 -1.10420 2.37348  
F -7.44580 -1.40907 2.63088  
N -9.34951 -0.73289 0.60931  
F -8.02094 0.39652 -1.86609  
F -5.40108 0.66412 -2.05610  
C -10.22732 -0.30848 -0.58461  
C -9.62500 -2.23698 0.84267

C -9.82921 0.09691 1.82283  
H -11.25884 -0.50263 -0.29039  
H -10.08927 0.75258 -0.78160  
H -9.96948 -0.90531 -1.45739  
H -10.70266 -2.36033 0.95581  
H -9.26635 -2.78610 -0.02873  
H -9.11514 -2.56680 1.74462  
H -10.89757 -0.08585 1.94298  
H -9.29592 -0.21684 2.71673  
H -9.64404 1.15015 1.60928  
C -0.00179 5.48223 2.37212  
C -0.09374 6.81813 2.76126  
C -0.61937 7.81820 1.91430  
C -1.03827 7.37433 0.64524  
C -0.93139 6.02641 0.27542  
F 0.50991 4.57985 3.29132  
F 0.35248 7.13926 4.03935  
F -0.69228 9.23782 2.40443  
F -1.56315 8.22628 -0.31473  
F -1.35286 5.69159 -1.00378  
C -1.30507 10.22976 1.39634  
C -1.57475 9.30483 3.67303  
C 0.73418 9.74774 2.71514  
H -1.62808 10.34959 3.98065  
H -2.56716 8.93151 3.41778  
H -1.12835 8.70641 4.46315  
H -1.29910 11.20486 1.88338  
H -0.69626 10.25854 0.49533  
H -2.32695 9.93327 1.16747  
H 0.64918 10.78171 3.05210  
H 1.17854 9.13626 3.49704  
H 1.32201 9.69156 1.79823  
C 2.98960 2.59369 -4.76021  
C 2.36621 3.56619 -5.58257  
C 1.01434 3.43155 -5.94111  
C 0.29653 2.32280 -5.47240  
C 2.25983 1.49669 -4.29387  
C 0.88862 1.33178 -4.63849  
C -1.04289 2.22481 -5.86810  
C -1.78556 1.08468 -5.53553  
C 0.08895 0.23076 -4.16500  
H -1.23474 0.06592 -4.70782  
C -3.07977 0.99985 -6.06660  
C -3.85704 -0.13488 -5.78002  
C -3.33331 -1.17622 -4.97326  
C -2.04212 -1.07607 -4.44705  
H -3.45590 1.80344 -6.69170  
H -4.86149 -0.21416 -6.18605  
H -3.93959 -2.05258 -4.76345  
H -1.64137 -1.86754 -3.82222  
H 0.06818 1.80209 -2.19115  
H 0.56648 -0.59922 -3.66109  
H 0.91915 4.16067 -6.57449  
H 2.93437 4.41966 -5.94139  
H 4.03505 2.70360 -4.48889  
H 2.73127 0.75576 -3.65602

171

(3/1) Hydroxylated Product  
Mn 0.08902 -0.18949 7.74362  
O 0.23143 -0.63959 2.30421  
O -0.25560 0.54935 -1.41166  
N 1.42002 1.37951 0.90934  
N -1.43739 1.11164 1.01040  
N 1.26555 -1.67198 0.30954  
N 1.57158 -1.33900 0.01469  
C 2.80393 1.31449 0.79925  
C 3.39177 2.59657 1.10241  
C 2.34697 3.45743 1.39572  
C 1.13100 2.69410 1.27111  
H 2.41540 4.50432 1.65583  
H 4.44537 2.83584 1.07451  
C 3.52854 0.16588 0.38293  
C -2.80232 0.79430 1.07988  
C -3.57008 1.98844 1.42321  
C -2.68224 3.01687 1.56913  
C -1.34741 2.47681 1.33271  
C -0.17339 3.21090 1.46347  
H -2.90665 4.04322 1.82319  
H -4.64343 2.03028 1.54100  
C -0.98277 -2.97415 -0.09491  
C -2.19116 -3.75814 -0.13183  
C -3.22640 -2.91676 0.24357  
C -2.63987 -1.62638 0.50975  
C -3.36551 -0.46335 0.87754  
H -4.27544 -3.16617 0.31685  
H -2.26428 -4.80307 -0.39789  
C 2.94108 -1.03514 -0.01326  
C 3.69539 -2.19803 -0.47513  
C 2.79811 -3.19939 -0.71166  
C 1.47295 -2.68377 -0.38325  
C 3.10356 -3.44736 -0.43087  
H 3.01132 -4.19507 -1.07344

H 4.76779 -2.24279 -0.59671  
C -0.28397 4.65641 -1.83670  
C -8.48494 -0.60896 1.03430  
C 4.02080 -4.87469 -0.86641  
C 5.01931 0.26241 0.39778  
C 5.74840 0.31138 1.59705  
C 7.13750 4.02015 1.63299  
C 7.92255 0.48867 0.46088  
C 7.20348 4.43436 -0.74823  
C 5.80552 0.32761 -0.75871  
F 5.08166 0.22988 2.80910  
F 7.73892 0.45474 2.88715  
N 9.41521 0.62410 0.57946  
F 7.81672 0.49266 -1.99053  
F 5.18963 0.30854 -2.00327  
C 10.16028 0.69488 -0.76794  
C 9.75335 1.93097 1.33428  
C 9.99085 -0.59586 1.33582  
H 11.07352 -0.47294 1.37895  
H 9.57931 -0.63165 2.34152  
H 9.73067 -1.49612 0.77831  
H 10.83962 1.99987 1.40111  
H 9.53099 2.76708 0.76117  
H 9.32044 1.90182 2.33129  
H 11.21969 0.78762 -0.52796  
H 9.98482 -0.21857 -1.33232  
H 9.82565 1.56760 -1.32479  
C 0.90804 -5.88496 -0.03014  
C 1.00950 -7.22971 -0.41422  
C 0.61222 -7.65459 -1.69646  
C 0.11355 -6.64054 -2.54310  
C 0.02540 -5.30854 -2.13958  
F 1.30900 -5.56658 1.25861  
F 1.51142 -8.09640 0.54418  
F -0.31184 -6.94315 -3.83233  
F -0.46283 -4.88956 -3.05521  
N 0.67969 -9.06976 -2.20057  
C 1.26425 -10.07926 -1.19299  
C -0.74668 -9.56084 -2.54183  
C 1.58449 -9.13036 -3.45375  
H 1.25349 -11.04913 -1.69032  
H 2.28622 -9.79830 -0.94564  
H 0.64146 -10.10942 -0.30177  
H 1.63206 -10.17522 -3.77088  
H 1.15926 -8.52189 -4.24576  
H 2.57615 -8.77349 -3.17641  
H -0.66691 -10.59208 -2.88825  
H -1.35042 -9.50837 -1.63503  
H -1.7046 -8.93641 -3.32490  
C -5.42994 -1.17063 2.18711  
C -6.80853 -1.32500 2.32274  
F -7.72132 -0.93173 1.31980  
C -7.14500 -0.36623 0.16617  
C -5.75592 -0.21740 0.04635  
F -6.62294 -1.58549 3.22585  
F -7.26407 -1.88711 3.51091  
N -9.19402 -1.14220 1.53865  
F -7.89621 0.06782 -0.91536  
F -5.28167 0.33938 -1.13223  
C -10.08538 -0.68872 0.36571  
C -9.47309 -2.65023 1.74172  
C -9.65344 -0.33887 2.77745  
H -11.11359 -0.89037 0.66625  
H -9.94954 0.37676 0.19297  
H -9.83718 -1.26380 -0.52451  
H -10.55022 -2.77152 1.86199  
H -9.12461 -3.18186 0.85541  
H -8.95662 -0.30146 2.63166  
H -10.72018 -0.52205 2.91086  
H -9.10648 -0.67400 3.65533  
H -9.46886 0.71869 2.58513  
C -0.21691 5.10055 3.16529  
C -0.31298 6.44833 3.51263  
C -0.47798 7.46621 2.54814  
C -0.54394 7.02906 1.21136  
C -0.44667 5.66824 0.88699  
F -0.05819 4.17922 0.18809  
F -0.24356 6.76233 4.86581  
N -0.57542 8.89799 2.99668  
F -0.70650 7.89615 0.14228  
F -0.51868 5.33185 -0.45607  
C -0.73776 9.91808 1.85204  
C -1.80913 9.06646 3.91394  
C 0.71414 9.29339 3.75394  
H -1.86158 10.11641 4.20342  
H -2.69643 8.78191 3.34729  
H -1.69737 8.44170 4.79695  
H -0.78636 10.90028 2.32285  
H 0.12315 9.86493 1.88838  
H -1.65963 9.71660 1.31035  
H 0.61602 10.34062 4.04179  
H 0.82412 8.67181 4.63896  
H 1.56027 9.16027 3.07890

151

(3/3) Reactants  
Mn -0.11748 -0.23366 0.86438  
O 0.10419 -0.66931 2.50535  
O -0.38737 0.27096 -0.99150  
N 1.24045 1.28894 1.02803  
N -1.63016 1.06250 1.30503  
N -1.48783 -1.72767 0.59483  
N 1.36852 -1.47799 0.22960  
C 2.61406 1.19994 0.85757  
C 3.22756 2.49864 1.11486  
C 2.21395 3.36607 1.42331  
C 0.96940 2.60548 1.37031  
H 2.30051 4.41695 1.65787  
H 4.28391 2.71815 1.06016  
C 3.31550 0.05121 0.46140  
C -2.97678 0.75237 1.44442  
C -3.71646 1.94452 1.83871  
C -2.81017 2.96770 1.93126  
C -1.50277 2.41305 1.60228  
C -0.30233 3.14119 1.62645  
H -3.00681 3.69304 2.20850  
H -4.77966 1.99220 2.02398  
C -1.22748 -3.02426 0.17700  
C -2.46484 -3.79852 0.17561  
C -3.46402 -2.95798 0.58738  
C -2.85075 -1.65860 0.84427  
C -3.55331 -0.51114 1.24121  
H -4.51244 -3.19243 0.70016  
H -2.55628 -4.83986 -0.09675  
C 2.72401 -1.18463 0.15575  
C 3.45556 -2.35827 -0.30418  
C 2.53544 -3.35373 -0.50199  
C 1.23033 -2.80526 -0.15554  
C 0.02966 -3.53222 -0.18620  
H -2.72260 -4.35837 -0.85199  
H 4.52259 -2.41168 -0.46407  
C -0.38587 4.59955 1.95981  
C -5.03098 -0.64436 1.45216  
C 0.09277 -4.96272 -0.62704  
C 4.80692 -0.55385 2.39813  
C 5.66043 -0.23541 1.39215  
C 7.04914 -0.14695 1.29448  
F 6.69451 0.33399 0.13445  
C 6.84256 0.72702 -0.91577  
C 5.44886 0.63226 -0.79351  
F 5.12256 -0.72104 2.57147  
F 7.78906 -0.55385 2.39813  
N 9.19654 0.38952 0.09631  
F 7.31150 1.22243 -2.12106  
F 4.68713 1.03779 -1.87814  
C 9.78491 0.90978 -1.23036  
C 9.70796 1.33716 1.20686  
C 9.76921 -1.03330 0.30020  
H 10.85546 -0.96042 0.23999  
H 9.47553 -1.41094 1.27638  
H 9.38398 -1.67212 -0.49529  
H 10.79698 1.35163 1.14865  
H 9.30209 2.33205 1.02032  
H 9.39200 0.96617 2.17898  
H 10.86812 0.89545 -1.11019  
H 9.49128 0.25036 -2.04488  
H 9.44233 1.92658 -1.40904  
C 0.51839 -5.99327 0.21654  
C 0.56799 -7.33944 -0.17297  
C 0.18102 -7.73927 -1.46638  
C -0.23850 -6.69983 -2.32468  
C -0.27949 -5.36693 -1.91570

F 0.90430 -5.69291 1.51280  
F 1.01020 -8.23166 0.78956  
F -0.63193 -6.97523 -3.62860  
F -0.70044 -4.42020 -2.83462  
N 0.18204 -9.15655 -1.96994  
C 0.64320 -10.20662 -0.93852  
C -1.25454 -9.55624 -2.38445  
C 1.14078 -9.27640 -3.17835  
H 0.58269 -11.17195 -1.44130  
H 1.66997 -10.00487 -0.64039  
H -0.02210 -10.19280 -0.07751  
H 1.13314 -10.31822 -3.50052  
H 0.79529 -8.63462 -3.98531  
H 2.14012 -8.98574 -2.85221  
H -1.22062 -10.59144 -2.72560  
H -1.90070 -9.46291 -1.51073  
H -1.59705 -8.91089 -3.18952  
C -5.57598 -1.12411 2.64994  
C -6.95037 -1.25819 2.84650  
C -7.89116 -0.92517 1.84808  
C -7.35095 -0.43757 0.64256  
C -9.56543 -0.30693 0.46872  
F -4.73438 -1.47864 3.69032  
F -7.36954 -1.73702 4.08182  
N -9.35758 -1.10264 2.12982  
F -8.13383 -0.06306 -0.63683  
F -5.52124 0.17433 -0.75189  
C -10.28464 -0.73034 0.95566  
C -9.64857 -2.58612 2.45914  
C -9.74606 -0.90200 3.31819  
H -11.30204 -0.92271 1.29697  
H -10.16481 0.32372 0.71447  
H -10.05437 -1.35699 0.09614  
H -10.71897 -2.67455 2.64781  
H -9.36117 -3.18908 1.59731  
H -9.09005 -2.88359 3.34297  
H -10.83485 -0.33012 3.47722  
H -9.21622 -0.49897 4.20888  
H -9.54039 0.83374 3.05291  
C -0.09892 5.10244 3.23545  
C -0.17789 6.46145 3.54022  
C -0.55304 7.42908 2.58327  
C -0.84454 6.93083 1.29890  
C -0.75845 5.60406 1.01509  
F 0.27125 4.23183 4.24634  
F 1.30883 6.87722 4.84189  
N -0.60932 8.87728 2.98249  
F -1.22610 7.74434 0.24499  
F -1.05434 5.16099 -0.27828  
C -1.03017 9.83977 1.85333  
C -1.64181 9.05604 4.12103  
C 0.79259 9.33884 3.44808  
H -1.69736 10.12041 4.35098  
H -2.66613 8.69081 3.76603  
H -1.31804 8.50137 4.99832  
H -1.02469 10.83961 2.87677  
H -0.31251 9.78318 1.03741  
H -2.03138 9.58854 1.50939  
H 0.71989 10.39380 3.71449  
H 1.10170 8.75726 3.31324  
H 1.48806 9.20284 2.61876  
C 1.41982 4.79768 -3.42587  
C 0.98336 5.14264 -4.72305  
C 0.71118 4.13204 -5.66057  
C 0.88038 2.78959 -5.29220  
C 1.58095 3.44342 -3.08189  
C 1.31795 2.41053 -4.00668  
O 0.58474 1.83694 -6.29608  
C 0.68936 0.46028 -5.99687  
C 1.49868 0.95135 -3.62161  
C 1.11767 -0.00647 -4.73845  
C 0.33758 -0.41548 -4.70380  
C 0.40967 -1.80269 -6.82727  
C 0.83038 -2.30079 -5.57537  
C 1.17793 -1.40351 -4.54958  
H 0.01468 -0.00401 -7.99070  
H 0.13890 -2.48582 -6.72789  
H 0.88533 -3.37210 -5.40286  
H 1.50325 -1.78680 -3.58425  
H 0.89468 0.73418 -2.72596  
H 2.54549 0.77784 -3.33121  
H 0.37249 4.36828 -6.66513  
H 0.85535 6.18544 -5.00085  
H 1.63201 5.57391 -2.69570  
H 1.91809 3.17711 -2.08206

151

(3/3) C-H Transition State  
Mn -0.25654 0.18025 -0.13921  
O -0.03944 -0.24426 1.50734  
O -0.66238 0.64426 -1.99402  
N 1.09919 1.69979 -0.00055  
N -1.76690 1.47487 0.34706

N -1.63236 -1.31333 -0.38499  
N 1.23276 -1.08231 -0.73316  
C 2.47329 1.61014 -0.17999  
C 3.08957 2.90376 0.08724  
C 2.08099 3.76523 0.42884  
C 0.83545 3.00778 0.38195  
H 2.17330 4.81140 0.68118  
H 4.14516 3.12413 0.02317  
C 3.17613 0.45510 -0.55635  
C -3.11468 1.17202 0.47135  
C -3.84878 2.35938 0.89677  
C -2.93527 3.37116 1.02388  
C -1.63109 2.81589 0.67548  
C -0.42779 3.53803 0.69396  
H -3.12445 4.38876 1.33284  
H -4.91211 2.40915 1.08094  
C -1.37051 -2.62128 -0.76646  
C -2.61280 -3.38747 -0.77806  
C -3.61533 -2.53155 -0.40901  
C -2.99869 -1.23209 -0.16193  
C -3.69890 -0.08181 0.23469  
H -4.66744 -2.75785 -0.31565  
H -2.70597 -4.43419 -1.02779  
C 2.58782 -0.79240 -0.81654  
C 3.32143 -1.98384 -1.22577  
C 2.40187 -2.98729 -1.38025  
C 1.09499 -2.42340 -1.06298  
C -0.10836 -3.14756 -1.08319  
H 2.59027 -4.00537 -1.68808  
H 4.38853 -2.04292 -1.38319  
C -0.48912 4.97769 1.10423  
C -5.18196 -0.20377 0.41083  
C -0.40273 -4.59627 -1.45945  
C 4.66804 0.55316 -0.66344  
C 5.51807 0.16685 0.38122  
C 6.90711 0.25470 0.28877  
C 7.55739 0.73470 -0.86896  
C 6.70929 1.12814 -1.92205  
C 3.51513 1.03431 -1.80459  
F 4.97595 -0.31633 1.55963  
F 7.64265 -0.15115 1.39575  
N 0.05951 0.78947 -0.90187  
F 1.8241 1.62277 -3.12601  
F 4.55868 1.44000 -2.89297  
C 9.65244 1.30758 -2.22735  
C 9.56762 1.73821 0.20927  
C 9.63095 -0.63325 -0.69401  
H 10.17145 -0.56066 -0.74976  
H 9.33317 -1.00977 0.28136  
H 9.24900 -1.27294 -1.49037  
H 10.65690 1.75147 0.15534  
H 9.16356 2.73328 0.01980  
H 9.24740 1.36888 1.18064  
H 10.73526 1.29254 -2.10393  
H 9.36071 0.64735 -3.04191  
H 9.31117 2.32440 -2.40842  
C 0.40191 -5.58438 -0.57530  
C 0.45700 -6.94679 -0.90244  
C 0.05656 -7.40925 -2.17069  
C -0.38509 -6.41388 -3.06899  
C -0.43303 -5.06406 -2.72121  
F 0.80072 -5.22293 0.70150  
F 0.91876 -7.78996 0.09470  
F -0.79298 -6.75177 -4.35365  
F -0.87852 -4.16597 -3.67618  
N 0.06672 -8.84742 -2.61064  
C 0.54945 -9.84398 -1.53711  
C -1.36999 -9.28103 -2.98896  
C 0.10373 -9.00934 -3.82330  
H 0.48917 -10.83304 -1.99128  
H 1.57870 -9.62140 -1.26327  
H -0.10508 -9.79144 -0.66945  
H 1.02620 -10.06616 -4.09209  
H 0.64459 -8.41714 -4.65729  
H 2.00991 -8.67954 -3.52556  
H -1.32826 -10.32967 -3.28532  
H -2.00527 -9.15724 -2.11111  
H -1.73066 -8.67519 -3.81647  
C -5.76281 -0.72288 1.57495  
C -7.14315 -0.85150 1.73036  
C -8.05472 -0.46748 0.72310  
C -7.47827 0.05983 -0.44863  
C -6.08768 0.18128 -0.58208  
F -4.95196 -1.12788 2.62154  
F -7.59872 -1.38293 2.93089  
N -9.52903 -0.64989 0.95482  
F -8.22852 0.48108 -1.53412  
F -5.60764 0.70154 -1.77282  
C -10.42118 -0.19978 -0.21928  
C -9.83003 -2.15019 1.18298  
C -9.96775 0.18000 2.18405  
H -11.45019 -0.37894 0.09246  
H -10.26846 0.86040 -0.41002

H -10.18981 -0.79352 -1.10165  
H -10.90791 -2.25261 1.31307  
H -9.49687 -2.70022 0.30211  
H -9.31227 -2.49623 2.07430  
H -11.03868 0.02466 2.31822  
H -9.43013 -0.15822 3.06642  
H -9.75668 1.23017 1.97916  
C -0.09574 5.41024 2.37795  
C -1.14041 6.75004 2.76256  
C -0.58320 7.77027 1.89299  
C -0.99129 7.34269 0.61517  
C -0.93987 5.98948 0.25088  
F 0.34787 4.48491 3.30774  
F 0.27141 7.05239 4.05488  
N -0.58812 9.19623 2.37110  
F -1.45852 8.21281 -0.35589  
F -1.35116 5.66325 -1.03122  
C -1.07034 10.22301 1.32615  
C -1.53205 9.32967 3.58949  
C 0.85052 9.61521 2.75864  
H -1.53265 10.37771 3.89108  
H -2.53213 9.02062 3.28275  
H -1.16846 8.70783 4.40414  
H -1.00480 11.19909 1.80702  
H -0.41908 10.19198 0.45496  
H -2.10135 10.01173 1.04990  
H 0.81198 10.65545 3.08357  
H 1.21057 8.98623 3.56893  
H 1.48466 9.51366 1.87709  
C 0.87208 5.05368 -3.92497  
C 0.05563 5.24893 -5.06064  
C -0.38334 4.14133 -5.80717  
C -0.00374 2.85125 -5.40096  
C 1.23238 3.75214 -5.35565  
C 0.79366 2.62119 -4.26018  
O -0.47336 1.78388 -6.20051  
C 0.11330 0.5918 -6.03789  
C 1.10040 1.21900 -3.82585  
C 0.91752 0.20597 -4.91625  
C -0.14694 -0.42732 -7.05069  
C 0.61697 -1.71181 -6.95653  
C 1.24088 -2.04039 -5.85758  
C 1.48331 -1.08734 -4.85335  
H -0.77198 -0.14292 -7.89200  
H 0.22206 -2.44485 -7.73466  
H 1.68622 -3.02899 -5.78723  
H 2.11509 -1.34334 -4.00595  
H 0.30633 0.94451 -2.95929  
H 2.07175 1.13455 -3.33057  
H -1.00006 4.26294 -6.69274  
H -0.22983 6.25219 -5.36527  
H 1.22039 5.90817 -3.35126  
H 1.85713 3.60352 -2.65807

151

(3/3) Intermediate  
Mn 0.02489 -0.41455 0.85841  
O 0.22757 -0.77551 2.52007  
O -0.19189 0.02247 -1.06241  
N 1.42542 1.06338 0.92292  
N -1.44241 0.95116 1.27959  
N -1.40107 -1.86329 0.64008  
N 1.47013 -1.76572 0.33641  
C 2.79281 0.91782 0.74004  
C 3.45521 2.20158 0.94210  
C 2.47877 3.11386 1.24056  
C 2.10666 2.39933 1.22616  
C 1.60973 4.16330 1.45989  
H 4.51842 2.37973 0.87328  
C 3.45486 -0.27505 0.40936  
C -2.80137 0.70292 1.40162  
C -3.50003 1.93929 1.73769  
C -2.55463 2.92731 1.80542  
C -1.26505 2.30513 1.52115  
C -0.03912 2.98894 1.49696  
H -2.71622 3.97363 2.01994  
H -4.56374 2.03785 1.89827  
C -1.18524 -3.19875 0.32244  
C -2.45100 -3.92133 0.35286  
C -3.42266 -3.01732 0.69164  
C -2.76440 -1.72989 0.87412  
C -3.42501 -0.54193 1.22531  
H -4.48069 -3.20499 0.80256  
H -2.58030 -4.97473 0.15170  
C 2.82844 -1.51584 0.21516  
C 3.52231 -2.74047 -0.17060  
C 2.57282 -3.72074 -0.28101  
C 1.28723 -3.10774 0.03868  
C 0.05777 -3.78543 0.03372  
H 2.72663 -4.75172 -0.56429  
H 4.58441 -2.83345 -0.34500  
C -0.05733 4.45892 1.78398  
C -4.90775 -0.61030 1.42980

C 0.07145 -5.24539 -0.30114  
C 4.94351 -0.21698 0.25030  
C 5.82181 -0.60898 1.26876  
C 7.20810 -0.54452 1.12907  
C 7.82620 -0.08272 -0.05323  
C 6.94972 0.30894 -1.08352  
C 5.55887 0.23791 -0.91950  
F 5.31240 -1.06943 2.47089  
F 7.97370 -0.95291 2.21457  
N 9.32703 -0.03757 -0.13026  
F 7.39150 0.78055 -2.30867  
F 4.77201 0.64034 -1.98751  
C 9.88645 0.47188 -1.47359  
C 9.87013 0.91515 0.96074  
C 9.89712 -1.46186 0.06834  
H 0.98215 -1.39425 -0.01646  
H 9.62355 -1.83281 1.05291  
H 9.49070 -2.10259 -0.71505  
H 10.95704 0.92613 0.87329  
H 9.46146 1.90974 0.77858  
H 9.57966 0.55149 1.94349  
H 10.97219 0.45191 -1.37879  
H 9.57043 -0.19043 -2.27710  
H 9.54608 1.48995 -1.64975  
C 0.47583 -6.22360 0.61267  
C 0.49085 -7.59510 0.32133  
C 0.08916 -8.07733 -0.93905  
C -0.31487 -7.09256 -1.86624  
C -0.32202 -5.73314 -1.55448  
F 0.87594 -5.84156 1.88303  
F 0.91731 -8.42605 1.34412  
F -0.72171 -7.45098 -3.14573  
F -0.72726 -4.84619 -2.53752  
N 0.06266 -9.52567 -1.34328  
C 0.50856 -10.50780 -0.24123  
C -1.38184 -9.92891 -1.72349  
C 1.01426 -9.74488 -2.54342  
H 0.42821 -11.50602 0.67176  
H 1.53977 -10.30351 0.03908  
H -0.15348 -10.41809 0.61768  
H 0.98774 -10.80597 -2.79403  
H 0.67643 -9.15362 -3.39118  
H 2.01948 -9.44946 -2.24082  
H -1.36470 -10.98380 -1.99905  
H -2.01914 -9.77191 -0.85264  
H -1.72158 -9.33049 -2.56513  
C -5.47804 -1.06654 2.62528  
C -6.85749 -1.13535 2.81878  
C -7.77955 -0.75235 1.82082  
C -7.21415 -0.28870 0.61739  
C -5.82355 -0.22726 0.44547  
F -4.65698 -1.46150 3.66765  
F -7.30163 -1.59717 4.05186  
N -9.25308 -0.85240 2.10318  
F -9.79713 0.12868 -0.46136  
F -5.35477 0.23381 -0.77440  
C -10.15843 -0.42281 0.93195  
C -9.62438 -2.31960 2.42356  
C -6.61165 0.06141 3.29887  
H -11.18479 -0.56199 1.27207  
H -9.98903 0.62435 0.69628  
H -9.96260 -1.05571 0.06867  
H -10.69556 -2.34735 2.62610  
H -9.38408 -2.93044 1.55301  
H -9.07216 -2.65692 3.29703  
H -10.68904 -0.00795 3.51458  
H -9.08709 -0.27825 4.18887  
H -9.32670 1.08333 0.04632  
C -0.19102 4.97640 0.07920  
C -0.19357 6.34621 3.34307  
C -0.06055 7.31232 3.22215  
C 0.06440 6.80012 1.01639  
C 0.06330 5.41913 0.77463  
F -0.30999 4.11075 4.15348  
F -0.32557 6.73482 4.67094  
N -0.05252 8.77172 2.68416  
F 0.19140 7.60797 -0.10143  
F 0.18305 5.00703 -0.54295  
C 0.10546 9.72665 1.48358  
C -1.38553 9.14504 3.37367  
C 1.13472 9.06235 3.63337  
H -1.35155 10.21327 3.58983  
H -2.20269 8.91961 2.68788  
H -1.48959 8.58060 4.29714  
H 0.11194 10.73624 1.89470  
H 1.04672 9.52352 0.97663  
H -0.76724 9.60668 0.80483  
H 1.10851 10.12597 0.87297  
H 1.03013 8.47503 4.54237  
H 2.05851 8.80969 3.11192  
C -3.42543 3.06735 -3.29336  
C -3.59201 3.81926 -4.48208  
C -2.54596 3.88933 -5.42554

C -1.35168 3.20965 -5.16863  
C -2.22420 2.39018 -3.04631  
C -1.14576 2.44230 -3.98056  
O -0.33785 3.30927 -6.14296  
C 0.89264 2.64879 -5.94871  
C 0.10144 1.76698 -3.77608  
C 1.12772 1.87406 -4.76937  
C 1.84990 2.79217 -6.95726  
C 3.09894 2.15295 -6.81534  
C 3.37046 1.37897 -5.66104  
C 2.40332 1.24249 -4.65669  
H 1.61858 3.39174 -7.83268  
H 3.84985 2.25775 -7.59337  
H 4.33449 0.88877 -5.55488  
H 2.61327 0.64807 -3.77073  
H -0.93388 -0.47762 -1.46569  
H 0.24486 1.17769 -2.86953  
H -2.65129 4.45894 -6.34413  
H -4.52449 4.34342 -4.67207  
H -4.23530 3.01598 -2.57040  
H -2.08659 1.80834 -2.13819

151

(3/3) Reb Transition State  
Mn -0.29025 0.01476 -0.02312  
O -0.02578 -0.35018 1.62105  
O -0.65551 3.36581 -1.99294  
N 1.08626 1.53046 -0.00410  
N -1.77865 1.36140 0.41859  
N -0.72011 -1.44583 -0.22540  
N 1.16759 -1.28201 -0.63267  
C 2.46421 1.40008 -0.15802  
C 3.10950 2.68316 0.11148  
C 2.12206 3.57501 0.42395  
C 0.85212 2.85439 0.36025  
H 2.24314 4.61515 0.68958  
H 4.17234 2.87311 0.07723  
C 3.14572 0.22770 -0.50028  
C -3.13462 1.08820 0.57802  
C -3.84047 2.29970 0.93625  
C -2.90341 3.31001 0.99224  
C -1.61948 2.71769 0.67995  
C -0.38921 3.41854 0.67128  
H -3.08053 4.35121 2.19955  
H -4.90157 2.38155 1.12249  
C -1.47062 -2.76546 -0.60524  
C -2.72655 -3.51203 -0.56407  
C -3.70239 -2.64166 -0.16346  
C -3.06315 -1.34492 0.04688  
C -3.73747 -0.17967 0.42184  
H -4.75410 -2.85173 -0.03144  
H -2.84271 -4.55919 -0.80390  
C 2.52353 -0.10168 -0.76322  
C 3.21370 -2.20367 -1.22386  
C 2.26427 -3.19421 -1.36281  
C 0.99124 -2.61616 -0.98460  
C -0.23615 -3.31512 -0.96422  
H 2.42253 -4.20809 -1.70081  
H 4.27133 -2.27768 -1.43328  
H -0.41878 4.85968 1.07050  
C -5.21220 -0.27212 0.65989  
C -0.21005 -4.75972 -1.35566  
C 4.63827 0.27638 -0.56265  
C 5.44398 -0.32709 0.41541  
C 6.83663 -0.27570 0.38145  
C 7.54480 0.38550 -0.64608  
C 6.74649 0.98561 -1.63850  
C 5.34703 0.92247 -1.58185  
F 4.85196 -0.98281 1.48242  
F 7.51938 -0.89737 1.42142  
N 9.04746 0.41456 -0.60591  
F 7.27809 1.66355 -2.72435  
F 4.64857 1.53248 -2.61504  
C 9.70318 1.16654 -1.78084  
C 9.51245 1.12902 0.68516  
C 9.59550 -1.03096 -0.64863  
H 10.68400 -0.97006 -0.62588  
H 9.23591 -1.58584 0.21446  
H 9.25868 -1.49532 -1.57604  
H 10.60210 1.16849 0.66609  
H 9.09455 2.13648 0.68461  
H 9.17500 0.57060 1.55504  
H 10.78000 1.10172 -1.62392  
H 9.43304 0.68614 -2.71876  
H 9.38616 2.20756 -1.76977  
C 0.24409 -5.76730 -0.49808  
C 0.26996 -7.12589 -0.84367  
C -0.16967 -7.56603 -2.10707  
C -0.61924 -6.55213 -2.98015  
C -0.63847 -5.20659 -2.61333  
F 0.68197 -5.43072 0.77325  
F 0.74374 -7.98986 0.13093  
F -1.06022 -6.86700 -4.26070

F -1.09248 -4.29028 -3.54792  
N -0.18613 -8.99762 -2.56792  
C 0.30123 -10.01559 -1.51720  
C -1.63334 -9.40898 -2.92955  
C 0.73913 -9.15325 -3.79748  
O 0.21604 -10.99767 -1.98249  
H 1.13900 -9.81250 -1.26108  
H -0.33492 -9.96379 -0.63593  
H 0.72589 -10.20422 -4.08876  
H 0.37013 -8.53585 -4.61318  
H 1.74617 -8.85026 -3.50772  
H -1.60747 -10.45226 -3.24591  
H -2.25228 -9.29509 -2.03886  
H -2.00177 -8.78443 -3.73942  
C -5.75198 -0.75089 1.86130  
C -7.12594 -0.83144 2.08817  
C -8.07531 -0.44040 1.11953  
C -7.54202 0.04461 -0.09025  
C -6.15683 0.11982 -0.29433  
F -4.90485 -1.15388 2.88034  
F -7.53717 -1.30937 3.32748  
N -9.54097 -0.55179 1.43653  
F -8.33376 0.47133 -1.14468  
F -5.72394 0.60232 -1.51955  
C -10.47736 -0.12053 0.29077  
C -9.89621 -0.20303 1.75548  
C -9.87401 0.35288 2.64591  
N -11.49441 -0.27429 0.65220  
H -10.31640 0.93068 0.06135  
H -10.21940 -0.74247 -0.58307  
H -10.96138 -2.05811 1.98650  
H -9.67620 -2.62564 0.87375  
H -9.31918 -2.36446 2.61105  
H -10.94626 0.27526 2.82801  
H -9.32204 0.10307 3.51918  
H -9.60347 1.37799 2.39008  
C -0.62893 5.27024 2.39584  
C -0.65887 6.61213 2.77302  
C -0.48325 7.66533 1.84639  
C -0.27110 7.26277 0.51361  
C -0.24297 5.90680 0.15897  
F -0.79373 4.31990 3.39012  
F -0.86334 6.88734 4.12096  
N -0.53122 9.06889 2.32744  
F -0.80876 8.16273 -0.52385  
F -0.04156 5.61315 -1.18254  
C -0.34317 10.14042 1.21807  
C -1.90721 9.37165 2.97321  
C 0.59856 9.32317 3.35631  
H -1.90814 10.41443 3.29219  
H -2.67883 9.20102 2.22196  
H -2.05104 8.71953 3.83113  
H -0.39795 11.11370 1.70617  
H 0.63168 10.01036 7.52529  
H -1.14213 10.04534 0.48497  
H 0.53921 10.36451 3.67455  
H 0.45977 8.66485 4.21060  
H 1.55224 9.02607 2.86584  
C -3.11564 4.12677 -3.52031  
C -3.76601 3.51992 -4.70287  
C -3.17185 2.61489 -5.52104  
C -1.93346 2.07869 -5.14558  
C -1.88238 3.47883 -3.15376  
C -1.25607 2.48321 -3.95820  
H -1.37647 1.11817 -5.99994  
C -0.09688 0.60809 -5.73849  
C -0.00116 1.87319 -3.61868  
C 0.61496 0.98486 -4.56327  
C 0.43594 -0.27438 -6.68653  
C 1.72212 -0.80225 -6.47574  
C 2.46278 -0.44112 -5.32237  
C 1.91608 0.43673 -4.38108  
H -0.14598 -0.53113 -7.56612  
H 2.14822 -1.48599 -7.20442  
H 3.45710 -0.85099 -5.17013  
H 2.47859 0.71031 -3.49384  
H -1.61679 0.48309 -2.15425  
H 0.57517 1.25345 -2.78390  
H -3.64771 2.27365 -6.43495  
H -4.72531 4.01708 -4.9

C 3.47715 2.47886 0.72120  
C 2.49995 3.36744 1.06939  
C 1.22483 2.65601 1.02253  
H 2.62979 4.40239 1.35082  
H 4.53979 2.66665 0.66710  
C 3.50548 0.03678 0.10410  
C -2.76573 0.91217 1.17348  
C -3.64221 2.10251 1.57316  
C -2.51183 3.10493 1.70160  
C -1.23656 2.51897 1.38633  
C 0.00181 3.21990 1.38326  
H -2.68533 4.13663 1.97125  
H -4.52701 2.18795 1.73643  
C -1.11485 -2.94464 -0.07122  
C -2.38199 -3.67088 -0.04874  
C -3.35606 -2.78505 0.31740  
C -2.71352 -1.49547 0.53687  
C -3.37833 -0.34438 0.93795  
H -4.41217 -2.98476 0.43020  
H -2.50617 -4.72005 -0.27427  
C 2.88919 -1.21549 -0.14911  
C 3.57773 -2.39377 -0.59398  
C 2.62423 -3.39117 -0.73719  
C 1.35616 -2.81858 -0.37194  
C 0.11826 -3.52189 -0.37389  
H 2.78674 -4.40343 -1.07780  
H 4.63651 -2.46902 -0.79730  
C -0.02244 4.65160 1.80130  
C -4.85808 -0.42633 1.15044  
C 0.15547 -4.97281 -0.71580  
C 4.99837 0.08593 0.02724  
C 5.81402 -0.46009 1.02939  
C 7.20632 -0.41844 0.97188  
C 7.90123 0.17430 -0.10533  
C 7.09177 0.71915 -1.11996  
C 5.69269 0.66697 -1.03886  
F 5.23374 -1.04976 2.14024  
F 7.90281 -0.98351 2.03503  
N 9.40471 0.18429 -0.09627  
F 7.61048 1.32773 -2.25216  
F 4.97988 1.21939 -2.09380  
C 10.04652 0.85799 -1.32494  
C 9.90728 0.96205 1.14298  
C 9.93081 -1.26977 -0.06972  
H 11.02017 -1.22499 -0.08093  
H 9.58729 -1.76755 0.83382  
H 9.56168 -1.78176 -0.95906  
H 10.99677 0.98246 1.09926  
H 9.50483 1.97475 1.09527  
H 9.57963 0.45842 2.04914  
H 11.12509 0.79393 -1.17995  
H 9.75762 0.32309 -2.22739  
H 9.73711 1.89992 -1.37318  
C 0.72221 -5.93475 0.13183  
C 0.77925 -7.30179 -0.16919  
C 0.25447 -7.80892 -1.37459  
C -0.31766 -6.84664 -2.23440  
C -0.36221 -5.49020 -1.91398  
F 1.24094 -5.54110 1.35640  
F 1.36654 -8.10907 0.79384  
F -0.85596 -7.22724 -3.46004  
F -9.92812 -4.63135 -2.84446  
N 0.27150 -9.25387 -1.78863  
C 0.91749 -10.20304 -0.76055  
C -1.17738 -9.75290 -1.99632  
C 1.08006 -9.40735 -3.09755  
H 0.85678 -11.20422 -1.18695  
H 1.95879 -9.92478 -0.60894  
H 0.36162 -10.16038 0.17384  
H 1.08791 -10.46705 -3.35584  
H 0.60530 -8.83438 -3.89041  
H 2.09416 -9.05022 -2.91532  
H -1.12317 -10.80169 -2.29101  
H -1.71237 -9.64760 -1.05198  
H -1.65701 -9.17085 -2.77949  
C -5.42151 -0.89034 2.34644  
C -6.79967 -0.96084 2.55002  
C -7.72940 -0.56951 1.56272  
C -7.17219 -0.09595 0.35922  
C -5.78291 -0.03268 0.17829  
F -4.59500 -1.29430 3.82808  
F -7.23554 -1.43191 3.88370  
N -9.20105 -0.67060 1.85520  
F -7.94297 0.33061 -0.71094  
F -5.32548 0.44088 -1.04160  
C -10.11461 -0.23484 0.69296  
C -9.57096 -2.13891 2.17068  
C -9.54986 0.23738 3.05770  
H -1.13868 -0.37716 1.03875  
H -9.93976 0.81384 0.46215  
H -9.92356 -0.86204 -0.17549  
H -10.64061 -2.16750 2.38117  
H -9.33742 -2.74521 1.29506

H -9.01222 -2.48115 3.03803  
H -10.62588 0.16730 3.21965  
H -9.01704 -0.10596 3.94139  
H -9.26727 1.26047 2.80704  
C -0.23578 5.05163 3.12995  
C -0.26908 6.38974 3.51912  
C -0.09486 7.45031 2.60239  
C 0.11880 7.06138 1.26607  
C 0.14892 5.70908 0.89882  
F -0.39838 4.09244 4.11686  
F -0.47323 6.65289 4.87031  
N -0.14706 8.86914 3.09630  
F 0.29890 7.97231 0.23623  
F 0.34186 5.42877 -0.44704  
C 0.03857 9.93282 1.99672  
C -1.52403 9.14419 3.74363  
C 0.98134 9.09980 4.12755  
H -1.52782 10.18337 4.07423  
H -2.29434 8.98001 2.98957  
H -1.66750 8.48225 4.59407  
H -0.02071 10.90169 2.49304  
H 1.01461 9.81026 1.53147  
H -0.75865 9.84083 1.26142  
H 0.91931 10.13822 4.45478  
H 0.84410 8.43351 4.97588  
H 1.93566 8.90952 6.35651  
C -2.92588 3.67333 -2.66882  
C -3.50556 3.37158 -3.92241  
C -2.91130 2.41724 -4.76173  
C -1.74172 1.76455 -4.33394  
C -1.76403 3.00295 -2.25822  
C -1.15762 2.02576 -3.07740  
O -1.18417 0.84245 -5.23784  
C 0.10594 0.34265 -4.98396  
C 0.05447 1.25010 -2.60894  
C 0.75928 0.55339 -3.75240  
C 0.71024 -0.36862 -6.03543  
C 2.01089 -0.86599 -5.86338  
C 2.70130 -0.64292 -4.65009  
C 2.07419 0.05940 -3.61004  
H 0.16576 -0.51005 -6.96395  
H 2.48878 -1.41337 -6.67122  
H 3.71338 -1.01576 -4.52248  
H 2.59959 0.22480 -2.67450  
H -0.98827 -0.40980 -1.91179  
H 0.74067 1.88377 -2.04316  
H -3.32682 2.17944 -5.73609  
H -4.40745 3.88462 -4.24486  
H -3.37995 4.42027 -2.02417  
H -1.32255 3.22431 -1.29140

151

(3/3x) Reactants

Mn -0.24772 0.15717 0.14265  
O -0.04898 -0.28854 1.78759  
O -0.48219 0.67211 -1.71336  
N 1.10620 1.68219 0.34791  
N -1.77020 1.45890 0.52178  
N -1.61071 -1.34594 -0.14617  
N 1.24160 -1.06976 -0.51705  
C 2.47715 1.60920 0.15001  
C 3.08748 2.90806 0.42051  
C 0.27248 3.76196 0.76328  
C 0.83222 2.99215 0.71019  
H 2.15572 4.80995 1.01253  
H 4.14076 3.13835 0.34936  
C 3.17881 0.47271 -0.28338  
C -3.12279 1.15311 0.61101  
C -3.87347 2.33889 1.00520  
C -2.96586 3.35499 1.15921  
C -1.65056 2.80064 0.86198  
C -0.44655 3.52178 0.95244  
H -3.16991 4.37213 1.46085  
H -4.94176 2.38850 1.15862  
C -1.34117 -2.64451 -0.55231  
C -2.58026 -3.41571 -0.60367  
C -3.59339 -2.56720 -0.24280  
C -2.98313 -1.26955 0.03546  
C -3.69558 -0.11181 0.39114  
H -4.64770 -2.79602 -0.18407  
H -2.66567 -4.45645 -0.88121  
C 2.59470 -0.76629 -0.59969  
C 3.33896 -1.93675 -1.04834  
C 2.42875 -2.94763 -1.22179  
C 1.11986 -2.40540 -0.87854  
C 0.07469 -3.14681 -0.89257  
H 2.62786 -3.95738 -1.55052  
H 4.40619 -1.98348 -1.21017  
C -0.53521 4.96824 1.33252  
C -5.18178 -0.23639 0.53832  
C 0.01191 -4.58585 -1.30357  
H -10.64061 -2.16750 2.38117  
C 5.54575 0.21295 0.60309

C 6.93124 0.31410 0.47691  
C 7.54805 0.79989 -0.69647  
C 6.67123 1.18298 -1.72972  
C 5.28130 1.07343 -1.57929  
F 5.03716 -0.27691 1.79394  
F 7.69765 -0.80602 1.56507  
N 9.04842 0.07010 -0.76469  
F 7.11133 1.68216 -2.94460  
F 4.49329 1.46997 -2.64867  
C 9.60569 1.39863 -2.10144  
C 9.57230 1.82129 0.33679  
C 9.63817 -0.54767 -0.57578  
H 10.72237 -0.46482 -0.65694  
H 9.36670 -0.93052 0.40480  
H 9.24301 -1.18750 -1.36561  
H 10.65916 1.85243 0.25235  
H 9.14695 2.81041 0.16337  
H 9.28559 1.44256 1.31495  
H 10.69120 1.39380 -2.00249  
H 9.30228 0.73828 -2.91152  
H 9.25089 2.41282 -2.27079  
C 0.39427 -5.59617 -0.41618  
C 0.48667 -6.94790 -0.77470  
C 0.19084 -7.37495 -2.08607  
C -0.19300 -6.35729 -2.98611  
C -2.77917 -5.01841 -2.60388  
F 0.69923 -5.26727 0.89466  
F 0.88039 -7.81740 0.22623  
F -0.50486 -6.66123 -4.30587  
F -0.65734 -4.09370 -3.56357  
N 0.25329 -8.79881 -2.56603  
C 0.68324 -9.82238 -1.49547  
C -1.14777 -9.23858 -3.05328  
C 1.28205 -8.90979 -3.71626  
H 0.67936 -10.79523 -1.98743  
H 1.68527 -9.58725 -1.14229  
H -0.03024 -9.81743 -0.67404  
H 1.33142 -9.95812 -0.10201  
H 9.25882 -8.30032 -4.55659  
H 2.24918 -8.57276 -3.34184  
H -1.07241 -10.27783 -3.37486  
H -1.84273 -9.14735 -2.21759  
H -1.45936 -8.61326 -3.88641  
C -5.78184 -0.76966 1.68655  
C -7.16437 -0.89929 1.81916  
C -8.06029 -0.50306 0.80264  
C -7.46505 0.03748 -0.35357  
C -6.07254 0.16009 -0.46381  
F -4.98843 -1.18556 2.74257  
F -7.63875 -1.44282 3.00711  
N -9.53804 -0.68690 1.00985  
F -8.19822 0.47090 -1.44621  
F -5.51766 0.69236 -1.64225  
C -10.41476 -0.22452 -0.17326  
C -9.84353 -2.18923 1.21808  
C -9.99526 0.13092 2.40399  
H -11.44567 -0.40444 0.12131  
H -10.25422 0.83702 -0.35201  
N -1.61683 4.81082 -1.05739  
H -10.92345 -2.29190 1.32999  
H -9.49689 -2.73048 0.33695  
H -9.34017 -2.54472 2.11392  
H -11.06709 -0.02987 2.36059  
H -9.46687 -0.21215 3.12646  
H -9.78635 1.18360 2.04650  
C -2.38002 5.42909 2.62197  
C -3.23250 6.75566 2.97571  
C -0.71398 7.77384 2.05701  
C -1.01631 7.31866 0.75935  
C -0.92432 5.95976 0.62645  
F 0.14525 4.52636 3.59976  
F -0.00706 7.10761 4.28773  
N -0.77699 9.20708 2.50803  
F -1.41456 8.16665 -0.26097  
F -1.23170 5.60475 -0.87727  
C -1.21128 10.20736 1.41760  
C -1.80261 9.38879 3.65890  
C 0.62455 9.65975 2.98217  
H -1.86052 10.39385 3.92787  
H -2.76799 8.98313 3.29725  
H -1.47065 8.75369 4.51308  
H -1.20620 11.19055 1.88850  
H -0.50068 10.18445 0.59395  
H -2.21440 9.96453 1.07296  
H 0.54574 10.70476 3.28424  
H 0.94059 9.05119 3.82593  
H 1.31718 9.55471 2.14615  
C 2.09095 4.65866 -0.56670  
C 1.62693 5.10620 -5.82238  
C 0.99445 4.20495 -6.69524  
C 0.83421 2.86403 -6.30439  
C 1.19115 3.31196 -4.19916  
C 1.29001 2.38711 -5.05956

O 0.18881 2.02856 -7.24307  
C -0.06358 0.67969 -6.90740  
C 1.11845 0.93195 -4.65412  
C 0.35636 0.11652 -5.68626  
C -0.76143 -0.06623 -7.87333  
C -1.05620 -1.41663 -7.62046  
C -0.65348 -2.00748 -6.40344  
C 0.04374 -1.23961 -5.45343  
H -1.06178 0.41499 -8.79954  
H -1.59516 -1.99956 -8.36260  
H -0.88048 -3.04997 -6.19862  
H 0.35363 -1.69538 -4.51534  
H 0.59917 0.87750 -3.68492  
H 2.10935 0.48078 -4.49163  
H 0.62573 4.52160 -7.66653  
H 1.75477 6.14422 -6.11761  
H 2.57981 5.35059 -3.88629  
H 2.27956 2.96584 -3.23272

151

(3/3x) C-H Transition State

Mn -0.26553 0.17768 -0.12349  
O 0.00022 -0.23720 1.51557  
O -0.64928 0.63907 -1.96684  
N 1.09386 1.70236 0.00302  
N -1.77724 1.46899 0.35903  
N -1.63947 -1.31644 -0.36528  
N 1.23002 -1.08367 -0.72590  
C 2.46654 1.61600 -0.17954  
C 3.08343 2.91272 0.08010  
C 2.07324 3.77420 0.42101  
C 0.82952 3.01058 0.38000  
H 2.16529 4.82179 0.66845  
H 4.13840 3.13633 0.01300  
C 3.16940 0.45765 -0.55308  
C -3.12528 1.16954 0.48345  
C -3.86241 2.36027 0.89682  
C -2.94862 3.37401 1.01717  
C -1.64349 2.81407 0.67638  
C -0.43838 3.53686 0.66714  
H -3.14059 4.39423 1.31631  
H -4.92624 2.41299 1.07874  
C -1.37747 -2.62324 -0.75495  
C -2.61904 -3.39200 -0.77305  
C -3.62337 -2.53848 -0.39955  
C -3.00610 -1.23998 -0.14453  
C -3.70709 -0.08856 0.25353  
H -4.67538 -2.76764 -0.30898  
H -2.71301 -4.43723 -1.02952  
C 2.58341 -0.79297 -0.81425  
C 3.31974 -1.98251 -1.22991  
C 2.40030 -2.98761 -1.38357  
C 1.09400 -2.42315 -1.05845  
C -0.11293 -3.14637 -1.07545  
H 2.59009 -4.00452 -1.69516  
H 4.38644 -2.04118 -1.39200  
C -0.50201 4.97869 1.09566  
C -5.19040 -0.21185 0.42906  
C -0.04780 -4.59369 -1.45924  
C 4.66225 0.55542 -0.65598  
C 5.50888 0.16511 0.39021  
C 6.89836 0.25166 0.30337  
C 7.55370 0.73418 -0.85045  
C 6.70965 1.13193 -1.90512  
C 5.31499 1.03957 -1.79269  
F 4.96270 -0.32092 1.56593  
F 7.62963 -0.15799 1.41214  
N 9.05604 0.78663 -0.87812  
F 7.18772 1.62960 3.10615  
F 5.6401 1.44994 -2.88355  
C 9.65397 1.30688 -2.20043  
C 9.56194 1.73183 0.23692  
C 9.62466 -0.63735 -0.67154  
H 10.71143 -0.56652 -0.72428  
H 9.32361 -1.01522 0.30231  
H 9.24380 -1.27500 -1.47006  
H 10.65146 1.74328 0.18706  
H 9.16042 2.72811 0.04838  
H 9.23736 1.36078 1.20620  
H 9.36370 1.28998 -2.07368  
H 9.36370 0.64910 -3.01753  
H 9.31462 2.32455 -2.38027  
C 4.0157 -5.58661 -0.58281  
C 0.45711 -6.94718 -0.91747  
C 0.05204 -7.40346 -2.18651  
C -0.39414 -6.40354 -3.07750  
C -0.44234 -5.05579 -2.7193  
F 0.80497 -5.23236 0.69491  
F 0.92380 -7.79549 0.07337  
F -0.80630 -6.73500 -4.36278  
F -0.89204 -4.15337 -3.67127  
N 0.06244 -8.83915 -2.63459  
C 0.55035 -9.84098 -1.56848

C -1.37495 -9.27247 -3.01042  
C 1.00545 -8.99330 -3.85120  
H 0.48931 -10.82763 -2.02781  
H 1.58046 -9.61874 -1.29756  
H -0.10076 -9.79383 -0.69994  
H 1.01681 -10.04833 -4.12704  
H 0.63390 -8.39548 -4.68011  
H 2.00269 -8.66579 -3.55439  
H -1.33300 -10.31931 -3.31308  
H -2.00737 -9.15460 -2.12969  
H -1.73926 -8.66222 -3.83306  
C -5.77198 -0.73547 1.59091  
C -7.15230 -0.86508 1.74590  
C -8.06408 -0.47780 0.74010  
C -7.84743 0.05368 -0.42965  
C -6.09689 0.17617 -0.56222  
F -4.96172 -1.14391 2.63702  
F -7.60805 -1.40052 2.94490  
N -9.53841 -0.66134 0.97107  
F -8.23785 0.47821 -1.51409  
F -5.61759 0.70033 -1.75191  
C -10.43035 -0.20796 -0.20185  
C -9.83916 -2.16231 1.19471  
C -9.97760 0.16466 2.20265  
H -11.45945 -0.38830 0.10893  
H -10.27779 0.85282 -0.38939  
H -10.19850 -0.99889 -1.08597  
H -10.91709 -2.26542 1.32400  
H -9.50543 -2.70971 0.31241  
H -9.32167 -2.01756 0.82525  
H -11.04819 0.00735 2.33734  
H -9.43874 -0.17497 3.08073  
H -9.76830 1.21568 2.00031  
C -0.10887 5.41748 2.36743  
C -0.15468 6.57870 2.74681  
C -0.59884 7.77511 1.87350  
C -1.00644 7.34182 0.59740  
C -0.95354 5.98718 0.23868  
F 0.33563 4.49674 3.30175  
F 0.25705 7.06675 4.03810  
N -0.60544 9.20290 2.34623  
F -1.47430 8.20789 -0.37374  
F -1.36372 5.65618 -1.04292  
C -1.08953 10.22480 1.29752  
C -1.54896 9.39633 3.56447  
C 0.83273 9.62533 2.73135  
H -1.55211 10.38900 3.86142  
H -2.54841 9.02657 3.25972  
H -1.18338 8.72231 3.81166  
H -1.02524 11.20294 1.77434  
H -0.43854 10.19104 0.42624  
H -2.12032 10.01087 1.02249  
H 0.79314 10.66672 3.05250  
H 1.19418 8.99972 3.54363  
H 1.46637 9.52136 1.84971  
C 0.91121 5.05220 -0.91707  
C 0.10648 5.25136 -0.50602  
C -0.32576 4.14675 -5.81482  
C 0.04655 2.85488 -5.49093  
C 1.26700 3.74943 -3.52853  
C 0.83562 2.62128 -4.26165  
O -0.41316 1.91736 -6.21720  
C -0.15914 0.51238 -6.04596  
C 1.14195 1.21694 -3.82672  
C 0.95209 0.20338 -4.91830  
C -0.10306 -0.42398 -7.05879  
C 0.44701 -1.71351 -6.95744  
C 1.25887 -2.04838 -5.85119  
C 1.50340 -1.09565 -4.84747  
H -0.71908 -0.13516 -9.70518  
H 0.25057 -2.44632 -7.73538  
H 1.69295 -3.04151 -5.77511  
H 2.12511 -1.35627 -3.99408  
H 0.37209 0.94734 -2.96443  
H 2.12150 1.13416 -3.34704  
H -0.93974 2.71399 -6.70578  
H -0.17540 6.25574 -5.36486  
H 1.12538 5.



H 2.21916 4.71884 0.79439  
H 4.17948 3.00950 0.15888  
C 3.18539 0.33591 -0.40122  
C -3.10002 1.10314 0.61815  
C -3.83120 2.30147 1.02257  
C -2.91137 3.31093 1.13745  
C -1.60791 3.23093 0.80732  
C -0.39796 3.45610 0.80691  
H -3.09836 4.33608 1.42325  
H -4.89582 2.36339 1.19700  
C -1.39199 -2.69627 -0.66991  
C -2.64233 -3.45275 -0.69810  
C -3.63752 -2.59282 -0.31359  
C -3.00498 -1.30297 -0.04647  
C -3.69164 -0.14809 0.36983  
H -4.69158 -2.81233 -0.22182  
H -2.74668 -4.49486 -0.96391  
C 2.59210 -0.91316 -0.65650  
C 3.31913 -2.10308 -1.09057  
C 2.39169 -3.09753 -1.26232  
C 1.08882 -2.52804 -0.92805  
C -0.12828 -3.23142 -0.98157  
H 2.57350 -4.11000 -1.59295  
H 4.38521 -2.16771 -1.25482  
C -0.46127 4.91040 1.16519  
C -5.17627 -0.25798 0.54702  
C -0.07877 -4.66700 -1.40794  
C 4.67684 0.42642 -0.52239  
C 5.53702 0.03585 0.51232  
C 6.92535 0.11838 0.40543  
C 7.56529 0.59746 -0.75836  
C 6.70767 0.99358 -1.80276  
C 5.31463 0.90467 -1.67030  
F 5.00637 -0.44594 1.69692  
F 7.67117 -0.29167 1.50433  
N 9.06719 0.64921 -0.80538  
F 7.17080 1.48534 -0.31214  
F 4.54825 1.31095 -2.75278  
C 6.64924 1.16943 -2.13475  
C 9.58702 1.59493 0.30274  
C 9.63786 -0.77490 -0.60601  
H 10.72394 -0.70442 -0.67237  
H 9.34886 -1.15263 0.37154  
H 9.24648 -1.41215 -1.39979  
H 10.67565 1.60759 0.23791  
H 9.18162 2.59062 0.11938  
H 9.27632 1.22384 1.27651  
H 10.73310 1.15288 -2.02053  
H 9.34991 0.51138 -2.94826  
H 9.30775 2.18710 -2.31062  
C 0.34117 -5.69465 -0.55759  
C 0.38120 -7.04423 -0.93613  
C -0.01039 7.45233 -2.22552  
C -0.42574 -6.41690 -3.09068  
C -0.45667 -5.08063 -2.69245  
F 0.72969 -5.38829 0.73703  
F 0.81849 -7.93207 0.03332  
F -0.82271 -6.70036 -4.39227  
F -0.87021 -4.13896 -3.62042  
C -0.01673 -8.87320 -2.71894  
C 0.44128 -9.91763 -1.68064  
C -1.45536 -9.26978 -3.12851  
C 0.93955 -9.00594 -3.92782  
H 0.37607 -10.88642 -2.17615  
H 1.46919 -9.71789 -1.38514  
H -0.22273 -9.89446 -0.81885  
H 0.92821 -10.05029 -4.24173  
H 0.59470 -8.36948 -4.73926  
H 1.94029 -8.71550 -3.60580  
H -1.42609 -10.30719 -3.46333  
H -2.09955 -9.16850 -2.25423  
H -1.79682 -8.62803 -3.93691  
C -5.76006 -0.76816 1.71365  
C -7.14131 -0.87914 1.87451  
C -8.05188 -0.48530 0.87018  
C -7.47294 0.03022 -0.30553  
C -6.08136 0.13364 -0.44399  
F -4.95121 -1.18044 2.75934  
F -7.59960 -1.40030 3.07886  
N -9.52787 -0.64001 1.11338  
N -8.22218 0.45886 -1.38925  
F -5.59978 0.64556 -1.63816  
C -10.41857 -0.18035 -0.05994  
C -9.85627 -2.13238 1.35092  
C -9.94359 0.20508 2.33814  
H -11.44868 -0.34231 0.25765  
H -10.25024 0.87654 -0.25580  
H -10.20070 -0.78071 -0.94113  
H -10.93449 -2.21240 1.49333  
H -9.54432 -2.69358 0.46944  
H -9.33573 -2.48454 2.23819  
H -11.01829 0.07917 2.47269  
H -9.41495 -0.14534 3.22125

H -9.70395 1.24861 2.13038  
C -0.15716 5.38806 2.46657  
C -0.21901 6.74203 2.77671  
C -0.59403 7.73056 1.84126  
C -0.90142 7.25851 0.55082  
C -0.83198 5.89264 0.24193  
F 0.21423 4.49609 3.43867  
F 0.10613 7.09160 4.08206  
N -0.63521 9.17205 2.26814  
F -1.28487 8.09517 -0.48457  
F -1.14516 5.51975 -1.05577  
C -1.05996 10.15884 1.16195  
C -1.65431 9.33737 3.42074  
C 0.77426 9.61388 2.72876  
H -1.69898 10.39786 3.67008  
H -2.62535 8.98596 3.07015  
H -1.32536 8.76466 4.28440  
H -1.04273 11.14985 1.61582  
H -0.35088 10.11361 0.33791  
H -2.06627 9.92179 0.82273  
H 0.71178 10.66404 3.01609  
H 1.08703 9.01362 3.57972  
H 1.46119 9.48824 1.89075  
C 0.39169 5.52686 -4.66941  
C -0.47261 5.45591 -5.78901  
C -0.65604 4.23104 -6.46193  
C 0.02643 3.09687 -6.00925  
C 1.06834 4.38426 -4.22496  
C 0.90585 3.12931 -4.88403  
O -0.19351 1.89903 -6.71772  
C 0.45782 0.71495 -6.31966  
C 1.57052 1.92797 -4.47848  
C 1.34611 0.71171 -5.20010  
C 0.18955 -0.43516 -7.06793  
C 0.81414 -1.64716 -6.71097  
C 1.70037 -1.68921 -5.60710  
C 1.96197 -0.53087 -4.86531  
H -0.49376 -0.37774 -7.90982  
H 0.61267 -2.54687 -7.28530  
H 2.17890 -2.62615 -5.33512  
H 2.64152 -0.56342 -4.01707  
H 0.18702 1.12428 -2.22031  
H 2.25495 1.94128 -3.63583  
H -1.31333 4.15199 -7.32257  
H -0.99659 6.34324 -6.13256  
H 0.53067 6.47339 -4.15436  
H 1.73242 4.43889 -3.36541

151  
(3/3x) Reb Transition State  
Mn -0.21542 0.07054 -0.09139  
O 0.00263 -0.39635 1.52165  
O -0.49009 0.43079 -2.03640  
N 1.21010 1.54159 0.00036  
N -1.67632 1.42867 0.34914  
N -1.65774 -1.37552 -0.33365  
N 1.23376 -1.25504 -0.70617  
C 2.58177 1.38973 -0.14062  
C 3.25154 2.66252 0.12214  
C 2.97218 3.57778 0.40992  
C 0.99573 2.86901 0.33971  
H 2.40474 4.62239 0.65303  
H 4.31782 2.83571 1.09714  
C 3.23871 0.19229 -0.48348  
C -3.03173 1.17951 0.50213  
C -3.72409 2.41225 0.87244  
C -2.77425 3.39847 0.94281  
C -1.49164 2.77607 0.61975  
C -0.25617 3.45080 0.61046  
H -2.93078 4.43924 1.18846  
H -4.78610 2.51715 1.04381  
C -1.44476 -2.68961 -0.71285  
C -2.70959 -3.42710 -6.18024  
C -3.67637 -2.54141 -0.28329  
C -3.01229 -1.25304 -0.07715  
C -3.66020 -0.06711 0.31776  
H -4.72774 -2.74479 -0.13731  
H -2.83991 -4.47423 -0.91396  
C 2.60020 -1.02991 -0.76910  
C 3.28588 -2.25095 -1.18945  
C 3.23218 -3.20789 -1.36983  
C 1.03728 -2.58462 -1.05009  
C -0.20167 -3.25325 -1.06043  
H 2.46747 -4.22860 -1.69311  
H 4.35032 -2.35916 -1.34320  
C -0.27706 4.91360 0.94054  
C -5.13649 -0.13826 0.56039  
C -0.20047 -4.69765 -1.46230  
C 4.73672 0.20783 -0.51247  
C 5.50378 -0.37440 0.50730  
C 6.89823 -0.36375 0.49994  
C 7.64356 0.23524 -0.53857  
C 6.88269 0.82198 -1.56765

C 5.48104 0.79993 -1.53704  
F 4.87069 -0.97647 1.58213  
F 7.54276 -0.96849 1.57310  
N 9.14577 0.21202 -0.47752  
F 7.45367 1.44638 -2.66495  
F 4.81933 1.39566 -2.60075  
C 9.84477 0.89361 -1.67027  
C 9.62060 0.95537 0.79348  
C 9.64076 -1.25310 -0.46253  
H 10.72999 -1.23050 -0.41749  
H 9.24261 -1.76696 0.40896  
H 9.30752 -1.73345 -1.38312  
H 10.71114 0.95439 0.78711  
H 9.24019 1.97687 0.75205  
H 9.25260 0.44104 1.67800  
H 10.91593 0.79612 -1.49288  
H 9.57115 0.38513 -2.59242  
H 9.56577 1.94466 -1.70602  
C 0.20589 -5.72278 -0.60235  
C 0.20272 -7.07916 -0.95784  
C -0.22046 -7.49800 -2.23377  
C -0.62548 -6.46619 -3.10788  
C -0.61508 -5.2318 -2.73154  
F 0.62569 -5.40652 0.68039  
F 0.63245 -7.96230 0.01969  
F -1.05063 -6.76014 -4.39855  
F -1.02473 -4.18752 -3.66729  
N -0.26271 -8.92495 -2.70678  
C 0.18313 -9.96310 -1.65734  
C -1.71246 -9.29865 -3.09724  
C 0.67919 -9.09349 -3.92229  
H 0.90997 -10.93804 -2.13616  
H 1.21819 -9.78139 -1.37587  
H -0.47083 -9.10167 -0.78913  
H 0.64114 -1.10407 -4.22454  
H 0.34161 -8.45808 -4.73771  
H 1.68905 -8.82215 -3.61217  
H -1.70546 -10.34007 -3.42051  
H -2.34506 -9.17593 -2.21743  
H -0.20548 -8.66000 -3.90925  
H -5.68793 -0.12921 1.84920  
C -7.06122 -0.20574 2.08065  
C -8.00015 -0.30388 1.03096  
C -7.45578 -0.30755 -0.26761  
C -6.07171 -0.22535 -0.47612  
F -4.85223 -0.05765 2.95179  
F -7.48240 -0.18590 3.40559  
N -9.46538 -0.39530 1.35758  
F -8.23540 -0.38498 -1.41071  
F -5.63209 -0.22147 -1.79106  
C -10.38721 -0.51757 0.12794  
C -9.72492 -1.64940 2.22633  
C -9.90702 0.87821 2.11578  
H -11.40398 -0.59103 0.51404  
H -10.28864 0.31665 -0.49426  
H -10.13396 -1.46905 -0.43155  
H -10.79546 -1.69253 2.42880  
H -9.40787 -2.52753 1.66313  
H -9.17376 -1.56972 3.16005  
H -10.97570 0.78804 2.31433  
H -9.35829 0.95434 3.05145  
H -9.70899 1.74075 1.47880  
C -0.19383 5.39381 2.25348  
C -0.23122 6.75468 2.55831  
C -0.35652 7.74781 1.56258  
C -0.43455 7.27321 0.23909  
C -0.39312 5.90020 -0.04253  
F -0.07494 4.49812 3.30294  
F -0.14642 7.10675 3.90056  
N -0.40903 9.19485 1.96792  
F -0.55958 8.11218 -0.85635  
C -0.48147 5.52236 -1.37379  
C -0.54189 10.18498 0.79334  
C -1.63749 9.42613 2.79688  
C 0.89121 9.57455 2.71460  
H -1.66417 10.48649 3.13194  
H -2.53260 9.14321 2.32469  
H -1.53927 8.83111 3.78457  
H -0.56636 11.18129 1.23557  
H 0.31922 10.09126 0.13441  
H -1.46723 9.99127 0.25479  
H 0.82401 10.63272 2.96952  
H 0.98194 8.97751 3.61848  
H 1.73345 9.39564 2.04545  
C -4.28016 3.03152 -3.37812  
C -6.62341 2.58464 -4.67882  
C -3.62847 2.10335 -5.54701  
C -2.30029 2.06998 -5.10293  
C -2.95117 2.98831 -2.94692  
C -1.92006 2.49940 -3.79848  
O -1.34439 1.59735 -6.01308  
C 0.01526 1.62459 -5.67490  
C -0.54206 2.41989 -3.40022

C 0.43983 2.04258 -4.37967  
C 0.91938 1.22831 -6.66864  
C 2.29534 1.24775 -6.38303  
C 2.75478 1.66272 -5.10795  
C 1.84156 2.05102 -4.12293  
H 0.54517 0.91885 -7.63943  
H 3.00703 0.94483 -7.14567  
H 3.81880 1.67390 -4.89476  
H 2.19192 2.36353 -3.14299  
H 0.29907 0.14480 -2.54609  
H -0.22990 2.83239 -2.45093  
H -3.86577 1.76408 -6.55040  
H -5.65717 2.61694 -5.01084  
H -5.05437 3.40699 -2.71516  
H -2.68829 3.32548 -1.94903

151  
(3/3x) Hydroxylated Product  
Mn 0.12471 -0.19627 0.72946  
O 0.36365 -0.62809 2.37255  
O -0.32515 0.24658 -1.50655  
N 1.50653 1.31270 0.73564  
N -1.35154 1.16569 1.14611  
N -1.31267 -1.61930 0.35796  
N 1.55820 -1.48963 0.03656  
C 2.87808 1.18242 0.55475  
C 3.54092 2.45760 0.81826  
C 2.56121 3.35445 1.15804  
C 1.29196 2.63311 1.11451  
H 2.68950 4.39492 1.42128  
H 4.60378 2.64400 0.76005  
C 3.54306 -0.00485 0.19281  
C -2.71019 0.91038 1.26464  
C -3.41433 2.12435 1.67500  
C -2.46987 3.11063 1.79625  
C -1.18138 2.50652 1.46076  
C 0.04600 3.19411 1.44626  
H -2.63339 4.14134 2.07774  
H -4.47877 2.21583 1.83942  
C -1.09972 -2.93985 -0.02039  
C -2.36456 -3.66984 -0.01760  
C -3.33854 -2.78136 0.36103  
C -2.67837 -1.50026 0.59461  
C -3.33173 -0.32695 1.01303  
H -4.39462 -2.98082 0.47590  
H -2.49447 -4.71497 -0.26043  
C 2.91947 -1.23968 -0.06569  
C 3.61946 -2.44663 -0.50370  
C 2.66958 -3.42102 -0.66439  
C 1.38163 -2.82026 -0.31859  
C 0.15060 -3.50166 -0.34308  
H 2.82639 -4.43743 -0.99646  
H 4.68188 -2.53303 -0.68315  
C 0.02016 4.64718 1.81614  
C -4.81755 -0.39964 1.20069  
C 0.16714 -4.94530 -0.74456  
C 5.03957 0.03962 0.11571  
C 5.85055 -0.48222 1.13355  
C 7.24349 -0.44110 1.08098  
C 7.94175 0.13045 -0.00478  
C 7.13604 0.65445 -1.03363  
C 5.73685 0.60318 -0.95676  
F 5.26466 -1.05385 2.25077  
F 7.93550 -0.98907 2.15524  
N 9.44530 0.13675 0.00650  
F 7.65833 1.24257 -2.17440  
F 5.02731 1.13922 -2.02175  
C 10.09082 0.79035 -1.23124  
C 9.94914 0.93102 1.23489  
C 9.96658 -1.31860 0.05570  
H 11.05607 -1.27753 0.04543  
H 9.62017 -1.80118 0.96640  
H 9.59710 -1.84280 -0.82637  
H 11.03881 0.94440 1.19300  
H 9.55265 1.94509 1.17080  
H 9.61699 0.44336 2.14805  
H 11.16888 0.72933 -1.08145  
H 9.80540 0.24024 -2.12569  
H 9.78098 1.83112 -1.29803  
C 0.58734 -5.96454 0.11603  
C 0.60008 -7.32131 -0.23765  
C 0.17923 -7.74712 -1.51202  
C -0.23852 -6.72133 -2.38727  
C -0.24362 -5.37783 -2.01283  
F 1.00484 -5.64196 1.39794  
F 1.04218 -8.19794 0.74026  
F -0.66091 -7.02210 -3.67734  
F -0.66343 -4.44839 -2.95061  
N 0.15076 -9.17554 -1.98198  
C 0.60750 -10.20717 -0.93070  
C -1.29586 -9.56420 -2.36965  
C 1.09279 -9.33733 -3.19821  
H 0.52211 -11.18414 -1.40664

H 1.64175 -10.01652 -0.65203  
H -0.40499 -10.15755 -0.06124  
H 1.06686 -10.38599 -3.49681  
H 0.74648 -8.70875 -4.01528  
H 2.09986 -9.05288 -2.89075  
H -1.27942 -10.60628 -2.69045  
H -1.92840 -9.44541 -1.48923  
H -1.64146 -8.93077 -3.18273  
C -5.41143 -0.59865 2.45372  
C -6.79389 -0.66912 2.62697  
C -7.69665 -0.53982 1.54960  
C -7.10801 -0.33730 0.28655  
C -5.71551 -0.27362 0.13648  
F -4.61113 -0.74229 3.57506  
F -7.26144 -0.87840 3.91954  
N -9.17477 -0.62402 1.81068  
F -7.85007 -0.18680 -0.87401  
F -5.22598 -0.06563 -1.14373  
C -10.06053 -0.45778 0.55934  
C -9.51515 -2.01039 2.40602  
C -9.59082 0.49845 2.79054  
H -11.09138 -0.54645 0.90310  
H -9.89653 0.52510 0.12153  
H -9.83672 -1.24586 -0.15644  
H -10.59240 -2.03766 2.57234  
H -9.22035 -2.77370 1.68446  
H -8.98981 -2.14486 3.34856  
H -10.66718 0.41465 2.94452  
H -9.06814 0.37313 3.73558  
H -9.34328 1.45771 2.33404  
C 0.09713 5.09206 3.14193  
C 0.05461 6.44414 4.38342  
C -0.06889 7.46658 2.51449  
C -0.14191 7.02472 1.17854  
C -0.09671 5.66005 8.85995  
F 0.21607 4.16878 4.16731  
F 0.13219 6.76013 4.83511  
N -0.12523 8.89922 2.95782  
F 0.26650 7.89290 0.10595  
F -0.18471 5.31888 -0.48112  
C -0.24980 9.20276 1.80952  
C -1.36022 9.10556 3.86632  
C 1.16964 9.25932 3.72352  
H -1.38697 10.15827 4.14897  
H -2.25141 8.84026 3.29626  
H -1.26983 8.48416 4.75418  
H -2.07674 10.90461 2.27853  
H 0.61540 9.84389 1.53581  
H -1.17166 9.74288 2.25985  
H 1.10096 10.31074 0.40076  
H 1.25348 8.63966 4.61269  
H 2.01667 9.09684 3.05610  
C -3.39530 3.22782 -2.62202  
C -3.89570 2.86803 -3.89423  
C -3.14218 2.03866 -4.73831  
C -1.89244 1.56830 -4.29771  
C -2.15005 2.73923 -2.19908  
C -1.38034 1.89009 -3.02400  
O -1.18235 0.76408 -5.20720  
C 0.16036 0.44992 -4.92837  
C -0.07016 1.03053 -5.24113  
C 0.74950 0.73331 -3.67983  
C 0.88229 -0.15401 -5.97285  
C 2.23605 -0.46585 -5.77512  
C 2.86079 -0.16558 -4.54304  
C 2.11705 0.42712 -3.51124  
H 0.38383 -0.35825 -6.91547  
H 2.80401 -0.92933 -6.57719  
H 3.91207 -0.39363 -4.39389  
H 2.59216 0.65004 -2.56079  
H -0.93898 -0.44173 -1.84064  
H 0.50678 2.03

C -2.98232 0.75279 1.42889  
C -3.72389 1.94878 1.80663  
C -2.81811 2.97229 1.89607  
C -1.50852 2.41452 1.58275  
C -0.30843 3.14189 1.62020  
H -3.01614 3.99993 2.16352  
H -4.78811 1.99816 1.98521  
C -1.23246 -3.02743 0.18705  
C -2.46846 -3.80349 0.18891  
C -3.46785 -2.96387 0.60247  
C -2.85529 -1.66372 0.85434  
C -3.55884 -0.51256 1.24061  
H -4.51605 -3.19898 0.71597  
H -2.55928 -4.84467 -0.08434  
C 2.71575 -1.18141 0.15886  
C 3.44555 -2.35071 -0.31404  
C 2.52480 -3.34378 -0.51923  
C 1.22089 -2.79883 -0.16380  
C 0.02318 -3.53002 -0.18798  
H 2.71056 -4.34549 -0.87822  
H 4.51232 -2.40291 -0.47585  
C -0.39455 -6.60235 1.94314  
C -5.03691 -0.64376 1.44927  
C 0.08717 -4.95862 -0.63494  
C 4.80310 0.14352 0.37780  
C 5.65081 -0.24281 1.42410  
C 7.04019 -0.15743 1.33284  
C 7.69212 0.32031 0.17513  
C 6.84559 0.71354 -0.87968  
C 5.45153 0.62194 -0.76384  
F 5.10632 -0.72599 2.60137  
F 7.77404 -0.56408 2.44064  
N 9.19442 0.37291 0.14397  
F 7.32146 1.20638 -0.08344  
F 4.69575 1.02794 -1.85245  
C 9.78974 0.88929 -1.18112  
C 9.70259 1.32166 1.25509  
C 9.76371 -1.05042 0.35361  
H 10.85037 -0.97929 0.29896  
H 9.46442 -1.42574 1.32898  
H 9.38177 -1.69032 -0.44260  
H 10.79198 1.33279 1.20282  
H 9.30069 2.31733 1.06421  
H 9.38024 0.95378 2.22631  
H 10.87238 0.87283 -1.05634  
H 9.49811 0.22893 -1.99560  
H 9.45008 1.90645 -1.36334  
C 0.51426 -5.99226 0.20402  
C 0.56341 -7.33693 -0.19074  
C 0.17457 -7.73180 -1.48511  
C -0.24598 -6.68909 -2.33892  
C -0.28678 -5.35780 -1.92465  
F 9.02043 -5.69668 1.50068  
F 1.00719 -8.23276 0.76771  
F -0.64102 -6.95948 -3.64341  
F -0.70971 -4.40756 -2.83898  
N 0.17461 -9.14720 -1.99392  
C 0.66360 -10.20126 -0.96682  
C -1.26250 -9.54477 -2.40870  
C 1.13226 -9.26298 -3.20357  
H 0.57422 -11.16471 -1.47309  
H 1.66344 -10.00103 -0.66898  
H -0.02814 -10.19044 -0.10509  
H 1.12264 -10.30328 -3.53059  
H 0.78728 -8.61687 -4.00729  
H 2.13231 -8.97559 -2.87672  
H -1.22933 -10.57879 -2.75351  
H -1.90799 -9.45423 -1.53418  
H -1.60534 -8.89644 -3.21122  
C -5.58418 -1.12292 2.64631  
C -6.95894 -1.25648 2.84055  
C -7.89795 -0.92343 1.84046  
C -7.35552 -0.43643 0.63570  
C -5.96968 -0.30640 0.46413  
F -4.74455 -1.47704 3.68845  
F -7.38034 -1.73491 4.07526  
N -9.36489 -1.10052 2.11972  
F -8.13643 -0.06241 -0.44529  
F -5.52332 0.17348 -0.75627  
C -10.28986 -0.72782 0.94404  
C -9.65670 -2.58397 2.44840  
C -9.77326 -0.19816 3.30751  
H -11.30791 -0.91946 1.28383  
H -10.16899 0.32613 0.70286  
H -10.05866 -1.35476 0.08500  
H -10.72745 -2.67228 2.63514  
H -9.36785 -3.18692 1.58704  
H -9.09978 -2.88156 3.33319  
H -10.84432 -0.32808 3.46473  
H -9.22694 -0.49703 4.19908  
H -9.54911 0.83579 3.04271  
C -0.11508 5.11488 3.21663  
C -0.19380 6.47640 3.51020

C -0.56129 7.43710 2.54337  
C -0.84582 6.92911 1.26123  
C -0.76006 5.55647 0.98877  
F 0.24748 4.25178 4.23673  
F 0.10763 6.86190 4.81072  
N -0.61614 8.88918 2.93012  
F -1.21897 7.73472 0.19826  
F -1.04761 5.14764 -0.30359  
C -1.02819 9.84225 1.79036  
C -1.65496 9.08000 4.06071  
C 0.78447 9.35032 3.39958  
H -1.70429 10.14576 4.28574  
H -2.61948 8.72064 3.70024  
H -1.34157 8.52680 4.94267  
H -1.02490 10.84571 2.21630  
H -0.30491 9.77819 0.97996  
H -2.02718 9.58864 1.44180  
H 0.71378 10.40812 3.65495  
H 1.08646 8.77641 4.27238  
H 1.48431 9.20382 2.57571  
C 1.46399 9.79276 -3.40742  
C 1.03742 5.14310 -4.70643  
C 0.76485 4.13607 -5.64770  
C 0.92376 2.78824 -5.28116  
C 1.61481 3.43682 -3.06531  
C 1.35129 2.40740 -3.99382  
C 0.62859 1.84313 -6.28887  
C 0.72336 0.46522 -5.99202  
C 1.52036 0.94640 -3.61054  
C 1.14107 -0.00668 -4.73194  
C 0.37312 -0.40619 -7.03810  
C 0.43588 -1.79427 -6.82924  
C 0.84581 -2.29750 -5.57583  
C 1.19196 -1.40447 -4.54583  
H 0.05863 0.00924 -7.99110  
H 0.16628 -2.47406 -7.63308  
H 0.89355 -3.36949 -5.40540  
H 1.50903 -1.79177 -3.57935  
H 0.90801 0.73139 -2.71940  
H 0.56452 0.76580 -3.31341  
H 0.43363 4.37641 -6.65378  
H 0.91735 6.18722 -4.98278  
H 1.67641 5.56616 -2.67431  
H 1.94413 3.16648 -2.06396

151

(3/5) C-H Transition State  
Mn -0.25905 0.17476 -0.11855  
O 0.01244 -0.24500 1.52638  
O -0.65316 0.64612 -2.00198  
N 1.09512 1.69718 0.00747  
N -1.77024 1.46473 0.36391  
N -1.63533 -1.31350 -3.36602  
N 1.22969 -1.08470 -0.72295  
C 2.64928 1.60787 -0.17159  
C 3.08469 2.90334 0.90905  
C 2.07535 3.76547 0.42728  
C 0.83066 3.00610 0.38385  
H 2.16641 4.81291 0.67477  
H 4.14011 3.12422 0.02495  
C 3.17282 0.45261 -0.54551  
C -3.11856 1.16379 0.49443  
C -3.85142 2.35293 0.91450  
C -2.93780 3.36578 1.03127  
C -1.63463 2.80922 0.68301  
C -0.43338 3.53453 0.69491  
H -3.12639 4.38552 1.33338  
H -4.91417 2.40338 1.10169  
C -1.37320 -2.61985 -0.75698  
C -2.61430 -3.38711 -0.77010  
C -3.61715 -2.53558 -0.39212  
C -3.00210 -1.23735 -0.13909  
C -3.70333 -0.09015 0.26282  
H -4.66861 -2.76401 -0.29675  
H -2.70660 -4.43224 -1.02665  
C 2.58464 -0.79461 -0.80660  
C 3.31797 -1.98483 -1.22082  
C 2.39801 -2.98723 -1.37899  
C 1.09164 -2.42369 -1.05825  
C -0.11265 -3.14591 -1.07950  
H 2.58554 -4.00410 -1.69130  
H 4.38492 -2.04339 -1.37947  
C -0.49727 4.97652 1.09682  
C -5.18570 -0.21333 0.44218  
C -0.04950 -4.59243 -1.46471  
C 4.66500 0.55011 -0.64997  
C 5.51243 0.16315 0.39663  
C 6.90175 0.24982 0.30735  
C 7.05509 0.72908 -0.84897  
C 6.70966 1.12323 -1.90393  
C 5.31515 1.03071 -1.78959  
F 4.96727 -0.30156 1.57384  
F 7.63443 -0.15642 1.61609

N 9.05734 0.78243 -0.87859  
F 7.18542 1.61736 -3.10688  
F 4.56170 1.43705 -2.87982  
C 9.65352 1.29939 -2.20306  
C 9.56395 1.73110 0.23331  
C 6.62711 -0.64068 -0.66878  
H 10.71379 -0.56898 -0.72213  
H 9.32686 -1.01649 0.30610  
H 9.24647 -1.20499 -1.46566  
H 10.65339 1.74283 0.18212  
H 9.16174 2.72663 0.04236  
H 9.24077 1.36269 1.20406  
H 10.73607 1.28328 -2.07747  
H 9.36271 0.63915 -3.01795  
H 9.31363 2.31647 -2.38527  
C 0.39325 -5.58689 -0.58684  
C 0.44649 -6.94720 -0.92297  
C 0.04598 -7.40068 -2.19441  
C -0.39934 -6.39873 -3.08655  
C -0.43942 -5.05117 -2.72988  
F 0.79214 -5.23430 0.69240  
F 0.90656 -7.79768 0.06873  
F -0.80074 -6.72755 -4.37371  
F -0.88273 -4.14594 -3.67911  
N 0.05400 -8.83599 -2.64369  
C 0.53381 -9.84070 -1.57644  
C -1.38305 9.26450 -3.02654  
C 1.00188 -8.99197 -3.85644  
H 0.47218 -10.82647 -2.03760  
H 1.56317 -9.62192 -1.29994  
H -0.12145 -9.79312 -0.70902  
H 1.01109 -10.04685 -4.13291  
H 0.63560 -8.39250 -4.68650  
H 1.99883 -8.66777 -3.55520  
H -1.34271 -10.31120 -3.32980  
H -2.01931 -9.14541 -2.14874  
H -1.74165 -8.65264 -3.85050  
C -5.76394 -0.73268 1.60744  
H -1.43968 -0.86168 1.76564  
C -8.05768 -0.47803 0.76020  
H -4.78380 0.04913 -0.41286  
C -6.09356 0.17111 -0.54907  
F -4.95801 -1.13738 2.65235  
F -7.59697 -1.39289 2.96722  
N -9.53152 -0.66026 0.99509  
F -8.23636 0.46991 -1.49692  
F -5.61604 0.69132 -1.74082  
C -0.42612 -2.01076 -0.17740  
C -9.83225 -2.16037 1.22482  
C -9.96751 0.17041 2.22476  
H -11.45445 -0.39015 0.13646  
H -10.27412 0.84941 -0.36878  
H -10.19631 -0.80467 -1.06005  
H -10.90986 -2.26252 1.35739  
H -9.50119 -2.71100 0.34355  
H -9.31257 -2.50597 2.11518  
H -11.03834 0.01598 2.36074  
H -9.42867 -0.16797 3.10634  
H -9.75594 1.22035 2.01919  
C -0.10640 5.41681 2.36862  
C -0.15234 6.75888 2.74508  
C -0.59428 7.77361 1.86867  
C -0.99646 3.33824 0.59259  
C -0.94673 5.98290 0.23647  
F 0.33613 4.49730 3.30464  
F 0.25727 7.06618 4.03619  
N -0.60086 9.20236 2.33838  
F -1.46547 8.20236 -0.38447  
F -1.35515 5.64870 -1.04451  
H -0.82244 10.22259 1.28673  
C -1.54636 9.34210 3.55488  
C 0.83705 9.62466 2.72498  
H -1.55017 10.39227 3.84887  
H -2.54527 9.02792 3.24952  
H -1.18182 8.72717 4.37433  
H -1.01846 11.20154 1.76193  
H -4.22971 10.18692 0.41678  
H -2.11284 10.00885 1.01012  
H 0.79754 10.66683 0.30434  
H 1.19665 9.00081 3.53944  
H 1.47212 9.51815 1.84469  
C 0.89822 5.05862 -3.93836  
C 0.09079 5.25594 -5.08007  
C -0.34397 4.14947 -5.83071  
C 0.02717 2.85848 -5.42627  
C 1.25391 3.75614 -3.54765  
C 0.81932 2.62641 -4.27633  
O -0.43512 1.79255 -6.22642  
C 0.14697 0.51618 -6.05972  
C 1.12172 1.22283 -3.83957  
C 0.94234 0.21046 -4.93268  
C -0.10913 -0.41946 -7.07447  
C 0.44983 -1.70580 -9.67650

C 1.26480 -2.03709 -5.87174  
C 1.50332 -1.08461 -4.86590  
H -0.72745 -0.13298 -7.92004  
H 0.25793 -2.43818 -7.75601  
H 1.70631 -3.02718 -5.79813  
H 2.12808 -1.34270 -4.01389  
H 0.33193 0.95030 -2.97916  
H 2.09456 1.13877 -3.34687  
H -0.95401 4.27257 -6.72070  
H -0.19107 6.25982 -5.38605  
H 1.24333 5.91212 -3.36121  
H 1.87163 3.60590 -2.66533

151

(3/5) Intermediate  
Mn 0.14015 -0.07376 0.96327  
O 0.29501 -0.58581 2.59032  
O -0.04774 0.50747 -0.92003  
N 1.44178 1.47524 1.24820  
N -1.41744 1.16421 1.44091  
N -1.17268 -1.57074 0.52711  
N 1.69291 -1.27283 0.38262  
C 2.81928 1.44354 1.07002  
C 3.39272 2.72923 1.44868  
C 2.35808 3.52466 1.86483  
C 1.13612 2.74085 1.73403  
H 2.41881 4.54102 2.22568  
H 4.44023 2.98936 1.40509  
C 3.56367 0.34363 0.61367  
C -2.76634 0.84606 1.39757  
C -3.55627 1.99135 1.83911  
C -2.67370 2.99224 2.14668  
C -1.33395 2.47337 1.89011  
C -0.14997 3.21254 2.04230  
H -2.90758 3.98598 2.50014  
H -4.63387 2.02423 1.90794  
C -0.85705 -2.86581 0.14203  
C -2.08065 -3.64578 -0.00757  
C -3.12691 -2.81000 0.27896  
C -2.55566 -1.51192 0.62209  
C -3.30618 -0.39038 1.00988  
H -4.17978 -3.05103 0.26145  
H -2.13347 -4.68671 -0.29138  
C 3.03090 -0.91769 0.30547  
C 3.82152 -0.06767 -0.12224  
C 2.95042 -3.10972 -0.29595  
C 1.61563 -2.60698 0.01537  
C 0.43646 -3.36305 -0.08381  
H 3.18643 -4.11414 -0.61609  
H 4.89248 -2.07791 -0.26347  
C -0.27228 4.61607 2.55102  
C -4.79854 -0.52775 1.02517  
C 0.57334 -4.80276 -0.47388  
C 5.04284 5.52623 0.45809  
C 5.93134 0.46413 1.53931  
C 7.30665 0.64486 1.39055  
C 7.90193 0.90868 0.13785  
C 7.01634 0.96185 -0.95552  
C 5.63763 0.77577 -0.78219  
F 5.44493 0.20806 2.81008  
F 8.08570 0.55231 2.53765  
N 9.38963 1.10614 0.05504  
F 7.43519 1.20218 -2.25352  
F 4.83996 0.85599 -1.91333  
C 9.91784 1.41360 -1.36076  
C 9.80033 2.30548 0.94238  
H 10.10646 -0.18151 0.52447  
H 11.17952 -0.01374 0.42773  
H 9.85267 -0.38385 1.56240  
H 9.78941 -1.08243 -0.11975  
H 10.87836 2.43336 0.84073  
H 9.27469 3.19073 0.58258  
H 9.54597 2.09974 1.97904  
H 10.99526 1.54771 -1.26144  
H 9.70506 0.57586 -2.02148  
H 9.45951 2.32840 -1.73205  
C 0.97480 -5.78559 0.43620  
C 1.12599 -7.13769 0.09745  
C 0.87585 -7.59371 -1.21094  
C 0.46765 -6.60495 -2.13205  
C 0.32263 -5.26490 -1.77241  
F 1.23850 -5.42772 1.74845  
F 1.52834 -9.77714 1.12302  
F 0.19581 -6.93931 -3.45334  
F -0.07030 -4.37005 -2.75321  
N 1.01447 -9.01825 -1.67151  
C 1.47237 -10.00563 -0.57917  
C -0.35325 -9.53015 -2.18114  
C 2.07507 -9.09516 -2.21998  
H 1.52441 -10.98421 -1.05697  
H 2.45566 -9.71705 -0.21260  
H 0.74478 -10.02266 0.22956  
H 2.17241 -10.14374 -3.08115

H 1.73658 -8.51089 -3.65402  
H 3.01336 -8.71014 -2.41109  
H -0.22079 -10.56710 -2.49113  
H -1.06842 -9.46623 -1.36034  
H -0.67850 -8.92769 -3.02590  
C -5.49359 -1.10827 2.09369  
C -6.88242 -1.24081 2.10082  
C -7.68805 -0.80010 1.02855  
C -6.99656 -0.21029 -0.04716  
C -5.60002 -0.08676 -0.03162  
F -4.79247 -1.57039 3.19455  
F -7.45624 -1.83288 3.21928  
N -9.17834 -0.98542 1.10048  
F -7.63318 0.27645 -1.17670  
F -5.00275 0.49985 -1.13683  
C -9.94763 -0.47418 -0.13422  
C -9.50646 -2.49267 1.22414  
C -9.73712 -0.21360 2.31929  
H -11.00179 -0.67191 0.05992  
H -9.78426 0.59501 -0.25231  
H -9.62236 -1.01971 -0.10179  
H -10.59228 -2.58861 1.25836  
H -9.10576 -3.00158 3.46665  
H -9.06907 -2.89041 2.13666  
H -10.81834 -0.35558 2.32910  
H -9.30141 -0.60790 3.23419  
H -9.49190 0.84190 2.19618  
C -0.45842 4.90820 3.90853  
C -0.57695 6.21399 4.38490  
C -0.51920 7.56376 3.51114  
C -0.33188 7.05130 2.16498  
C -0.21320 5.73074 1.70871  
F -0.52287 3.87501 4.82798  
N -0.76613 6.37539 5.75350  
F -0.66124 8.71545 4.11416  
F -0.25789 0.83060 1.19342  
F -0.04146 5.54350 0.34661  
C -0.77787 9.66007 3.08379  
C -0.24066 8.84373 4.80275  
C 0.47167 8.96325 1.37044  
H -2.11391 9.85580 5.20240  
H -2.81318 8.67089 4.05274  
H -2.11696 8.11950 5.61025  
H -0.69400 10.78626 3.64681  
H 0.39332 9.84228 2.59315  
H -1.38296 9.76122 2.35865  
H 0.34171 9.97704 5.52497  
H 0.40203 8.24435 9.94695  
H 1.42600 8.87646 4.61735  
C 2.91388 0.25434 -4.82384  
C 2.89603 0.22714 -6.23984  
C 1.66646 0.12149 -6.93097  
C 0.47527 0.23960 -6.19960  
C 1.71388 0.27322 -4.10110  
C 0.45301 0.26714 -4.77091  
O -0.72714 0.23148 -6.93585  
C -1.96544 0.25148 -6.26180  
C -0.80139 0.28932 -4.07882  
C -2.01886 0.28107 -4.83266  
C -3.11524 0.24129 -7.05680  
C -4.38110 0.26068 -6.43525  
C -4.47507 0.29003 -5.02267  
C -3.31585 0.30000 -4.23601  
H -3.01749 0.21887 -8.13815  
H -5.28081 0.25314 -7.04398  
H -5.45221 0.30514 -4.54734  
H -3.39016 0.32162 -3.15156  
H 0.37379 1.38096 -1.07032  
H -8.0502 0.31178 -2.98891  
H 1.62869 0.19885 8.01612  
H 3.82759 0.21225 -6.79876  
H 3.86350 0.26053 -4.29567  
H 1.71389 0.29102 -3.01379

151

(3/5) Reb Transition State  
Mn -0.07582 0.24220 -0.18230  
O 0.07558 -0.26647 1.43494  
O -0.29052 0.88454 -2.10346  
N 1.25209 1.78096 0.0

C -1.51042 2.85386 0.64166  
C -0.31768 3.59778 0.72933  
H -3.05465 4.37522 1.29739  
H -4.79844 2.37903 0.90636  
C -1.13025 -2.53745 -1.02024  
C -2.36205 -3.30831 -1.09266  
C -3.38841 -2.46975 -0.72635  
C -2.79757 -1.18220 -0.42066  
C -3.51563 -0.05657 0.01178  
H -4.43987 -2.71226 -0.66867  
H -2.43979 -4.34962 -1.36851  
C 2.81737 -0.67665 -0.79413  
C 3.58144 -1.84096 -1.20856  
C 2.68231 -2.84855 -1.45135  
C 1.35356 -2.31806 -1.16973  
C 0.15822 -3.05892 -1.28392  
H 2.90214 -3.84705 -1.79988  
H 4.65632 -1.88949 -1.30627  
C -0.41869 5.02814 1.14300  
C -5.00091 -0.20713 0.15016  
C 0.26408 -4.49693 -1.66122  
C 4.86605 0.67704 -0.44320  
C 5.59195 0.70566 0.75685  
C 6.98159 0.81421 0.79355  
C 7.76463 0.89938 -0.37817  
C 7.04597 0.86324 -1.58808  
C 5.64747 0.75632 -1.59974  
F 4.92279 0.61202 1.96572  
F 7.58203 0.83708 2.04724  
N 9.25745 1.03318 -0.25856  
F 7.65817 0.93470 -2.82909  
F 5.03074 0.74487 -2.84270  
C 10.00290 1.11549 -1.60538  
C 9.59482 2.33330 0.50879  
C 9.83321 -0.19400 0.48681  
H 10.91573 -0.07057 0.53106  
H 9.42201 -0.23931 1.49219  
H 9.57396 -1.08920 -0.07915  
H 10.68113 2.40411 0.57246  
H 9.18844 3.17440 -0.05409  
H 9.16560 2.29254 1.50705  
H 11.06229 1.20426 -1.36406  
H 9.82627 0.20729 -2.17787  
H 9.67008 1.99389 -2.15418  
C 0.84639 -5.45640 -0.81921  
C 0.96119 -6.81410 -1.14387  
C 0.47924 -7.31819 -2.36796  
C -0.11549 -6.36153 -3.21965  
C -0.21439 -5.01431 -2.87626  
F 1.32140 -5.06973 0.42590  
F 1.55610 -7.61774 -0.18259  
F -0.61930 -6.73897 -4.46083  
F -0.79202 -4.16012 -3.80546  
N 0.55703 -8.75366 -2.80704  
C 1.23097 -9.69515 -1.78980  
C -0.87020 -9.30243 -3.03579  
C 1.38229 -8.85362 -4.11097  
H 1.22456 -10.68805 -2.23937  
H 2.25519 -9.37159 -1.61430  
H 0.65953 -9.70089 -0.86379  
H 1.42723 -9.90667 -4.39151  
H 0.89696 -8.27988 -4.89662  
H 2.38263 -8.46858 -3.91114  
H -0.77604 -10.34511 -3.34179  
H -1.41743 -9.22707 -2.09558  
H -1.36256 -8.72807 -3.81697  
C -5.59894 -0.72299 1.30686  
C -6.97983 -0.87548 1.43312  
C -7.87548 -0.51848 0.40186  
C -7.28196 0.00482 -0.76303  
C -5.89079 0.14861 -0.86724  
F -4.80559 -1.10192 2.37687  
F -7.45272 -1.40385 2.62894  
N -9.35120 -0.72555 0.60328  
F -8.01584 0.40011 -1.87005  
F -5.39451 0.66453 -2.05413  
C -10.22615 -0.29957 -0.59230  
C -9.62929 -2.22938 0.83588  
C -9.83212 0.10493 1.81603  
H -11.25849 -0.49167 -0.29969  
H -10.08574 0.76122 -0.78910  
H -9.96811 -0.89709 -1.46454  
H -10.70738 -2.35110 0.94650  
H -9.26948 -2.77892 -0.03478  
H -9.12203 -2.56003 1.73900  
H -10.90103 -0.07616 1.93366  
H -9.30145 -0.20988 2.71111  
H -9.64477 1.15789 1.60304  
C 0.01804 5.49300 2.39342  
C -0.07770 6.83005 2.77727  
C -0.62632 7.82175 1.93502  
C -1.06388 7.36781 0.67558  
C -0.95521 6.01916 0.31073

F 0.55219 4.59941 3.30851  
F 0.38658 7.16068 4.04639  
N -0.70310 9.24293 2.41945  
F -1.61056 8.21083 -0.28002  
F -1.39316 5.67500 -0.95967  
C -1.33841 10.22489 1.41552  
C -1.56693 9.30885 3.70084  
C 0.72329 9.76611 2.70721  
H -1.62120 10.35416 4.00657  
H -2.56093 8.92958 3.46145  
H -1.10539 8.71500 4.48572  
H -1.33507 11.20212 1.89821  
H -0.74166 10.25547 0.50637  
H -2.36040 9.91786 1.20139  
H 0.63411 10.80097 3.04027  
H 1.18390 9.16242 3.48575  
H 1.29830 9.71004 1.78225  
C 2.99307 2.59415 -4.83250  
C 2.37615 3.55908 -5.66915  
C 1.02999 3.41571 -0.04630  
C 0.31185 2.30552 -5.58253  
C 2.26384 1.49473 -4.37193  
C 0.89820 1.31925 -4.73713  
O -1.02247 2.19956 -5.99248  
H -1.77309 1.07004 -5.64388  
C 0.10171 0.21464 -4.27919  
C -1.22465 0.05653 -4.80586  
C -3.07052 0.98855 -6.16635  
C -3.85566 -0.13585 -5.85913  
C -3.33645 -1.17014 -5.03955  
C -2.04168 -1.07468 -4.52252  
H -3.44441 1.78673 -6.79964  
H -4.86311 -0.21220 -6.25789  
H -3.95002 -2.03732 -4.81336  
H -1.64324 -1.86094 -3.88923  
H 0.12387 1.76836 -2.21232  
H 0.56877 -0.60205 -3.74615  
H 0.53978 4.14018 -6.68879  
H 2.94475 4.41406 -6.02359  
H 4.03351 2.71299 -4.54587  
H 2.73009 0.76002 -3.72291

151

(3/5) Hydroxylated Product  
Mn 0.07693 -0.16434 0.67110  
O 0.21080 -0.62038 2.27492  
O -0.24878 0.56118 -1.44967  
N 1.39635 1.39171 0.85654  
N -1.46696 1.14764 0.98023  
N -1.26734 -1.64641 0.23464  
N 1.58828 -1.36780 0.01830  
C 2.78802 1.32021 0.73154  
C 3.36509 2.61428 0.95702  
C 2.31911 3.48472 1.22766  
C 1.10531 2.71596 1.17870  
H 2.38964 4.54490 1.42248  
H 4.41625 2.85795 0.89852  
C 3.52451 0.15433 0.39261  
C -2.82574 0.80348 1.09457  
C -3.58409 1.96860 1.53206  
C -2.69960 2.99906 1.68665  
C -1.37164 2.49167 1.35008  
C -0.19617 3.24007 1.42817  
H -2.92085 4.00333 2.01768  
H -4.65026 1.99154 1.70707  
C -0.98517 -2.94569 -0.17757  
C -2.19906 -3.71355 -0.24195  
C -3.23509 -2.86964 0.13426  
C -2.65123 -1.59248 0.42923  
C -3.37686 -0.44545 0.84322  
H -4.28615 -3.11427 0.19082  
H -2.27628 -4.75446 -0.52043  
C 2.96508 -1.06931 0.05117  
C 3.72233 -2.25194 -0.33277  
C 8.22641 -3.24921 -0.59469  
C 1.48979 -2.71204 -0.35157  
C 0.31417 -3.45247 -0.46564  
H 3.04713 -4.25410 -0.92402  
H 4.79922 -2.31025 -0.39662  
C -0.29970 4.67600 1.81117  
C -4.85544 -0.60756 1.01162  
C 0.41113 -4.87623 -0.90094  
C 5.01542 0.26167 0.43632  
C 5.71800 0.34187 1.64893  
C 7.10598 0.45544 1.70979  
C 7.91300 0.50226 0.55148  
C 7.21933 0.41619 -0.67023  
C 5.82209 0.30184 -0.70617  
F 5.02569 0.28810 2.84749  
F 7.68315 0.51641 2.97391  
N 9.40281 0.64351 0.69567  
F 7.85684 0.44601 -1.90088  
F 5.23060 0.24666 -1.96089

C 10.17313 0.69826 -0.63855  
C 9.72555 1.96134 1.43864  
C 9.96519 -0.56560 1.47873  
H 11.04661 -0.44038 1.54164  
H 9.53382 -0.58919 2.47657  
H 9.71712 1.04710 0.92751  
H 10.81029 2.03036 1.52723  
H 9.33637 2.78930 0.84502  
H 9.27200 1.94714 2.42661  
H 11.22690 0.80303 -0.37958  
H 10.01554 -0.22552 -1.19115  
H 9.84286 1.55934 -1.21606  
C 0.92063 -5.89090 -0.08048  
C 1.01362 -7.23448 -0.46910  
C 0.58387 -7.65913 -1.74101  
C 0.06064 -6.64362 -2.57159  
C -0.01908 -5.31298 -2.16391  
F 1.34795 -5.57828 1.20204  
F 1.53747 -8.10291 0.47667  
F -0.39206 -6.94391 -3.85267  
F -0.52918 -4.39435 -3.06861  
N 0.64456 -9.07236 -2.25069  
C 1.24995 -10.08310 -1.25699  
C -0.78583 -9.56725 -2.56816  
C 1.52561 -9.12829 -3.52070  
H 1.23174 -11.05199 -1.75604  
H 2.27577 -9.80055 -1.02813  
H 0.64410 -10.11637 -0.35406  
H 1.56929 -10.16867 -3.84423  
H 1.08409 -8.51379 -4.30124  
H 2.52151 -8.76798 -3.26040  
H -0.70854 -10.59730 -2.91880  
H -1.37390 -9.51097 -1.65096  
C -1.1.22532 -8.94225 -3.34203  
C -5.42653 -1.16830 2.16207  
C -6.80328 -1.33272 2.31413  
C -7.72404 -0.95196 1.31359  
C -7.15906 -0.38822 0.15362  
C -5.77173 -0.22863 0.02550  
F -4.60928 -1.57259 3.20477  
F -7.24785 -1.89324 3.50682  
N -9.19391 -1.17331 1.54095  
F -7.91934 0.03541 -0.92524  
F -5.30703 0.32814 -1.15631  
C -10.09539 -0.72322 0.37079  
C -9.45912 -2.68284 1.75215  
C -9.65336 -0.36808 2.77865  
H -11.12017 -0.94156 0.67780  
H -9.96989 0.33360 0.19300  
H -9.84709 -1.30889 -0.51843  
H -10.53469 -2.81284 1.87748  
H -9.10966 -3.21579 0.86701  
H -8.93690 -3.02539 2.64163  
H -10.17180 -0.55959 2.91845  
H -9.09906 -0.69643 6.65516  
H -9.47874 0.69010 2.58058  
C 0.18838 5.18205 3.02784  
C 0.09304 6.52715 3.38036  
C -0.50541 7.49118 2.53884  
C -0.99638 6.99732 1.31492  
C -0.88596 5.64123 0.98006  
F 0.76563 4.32033 3.94782  
F 0.60289 6.89558 4.62212  
N -0.57998 8.92311 2.99005  
F -1.59927 7.80792 0.36429  
F -1.37507 2.26252 -0.26276  
C -1.25419 9.87394 1.98183  
C -1.40239 9.01291 4.29644  
C 0.84840 9.46819 3.22074  
H -1.44237 10.06306 4.58837  
H -2.40469 8.63416 4.09436  
H -0.91799 8.42874 5.07498  
H -1.24414 10.86340 2.43882  
H -0.68505 9.88522 1.05432  
H -2.27962 9.55431 1.80645  
H 7.56060 10.50925 3.53286  
H 1.34053 8.88854 3.99809  
H 1.39483 9.39755 2.27970  
C 3.11083 2.25097 -3.77188  
C 2.56064 3.12977 -4.73288  
C 1.21579 3.00536 -5.11335  
C 0.42784 2.00341 -4.52018  
C 2.30253 1.26533 -3.18559  
C 0.94260 1.13159 -3.53966  
O -0.90111 1.91445 -4.97226  
C -1.67106 0.79963 -4.59593  
C 0.05421 0.11454 -2.85740  
C -1.23494 -0.11638 -3.61599  
C -2.89971 0.64726 -5.26270  
C -3.70887 -0.45757 -4.95846  
C -3.28504 -1.40432 -3.99816  
C -2.06034 -1.22816 -3.33750  
H -3.19499 1.38058 -6.00676

H -4.65866 -0.58589 -5.47041  
H -3.90732 -2.26471 -3.76976  
H -1.73934 -1.94786 -2.59112  
H -0.88488 1.30788 -1.43697  
H 0.58942 -0.82040 -2.67825  
H 0.77394 3.65620 -5.86156  
H 3.17953 3.89815 -5.18812  
H 4.15491 2.33703 -3.48640  
H 2.72083 0.59640 -2.43964

2

133  
(4/3)  
Mn 0.07396 -0.49362 0.41180  
N 0.32435 -0.86671 2.51227  
O -0.11999 -0.16043 -1.36536  
N 1.50531 0.94328 0.56916  
N -1.35234 0.86943 0.93105  
N -1.33946 -1.95590 0.39539  
N 1.52218 -1.89796 0.09846  
C 2.87300 0.78535 0.37915  
C 3.54615 2.06932 0.52164  
C 2.57853 3.00120 0.79535  
C 1.30507 2.29485 0.82658  
H 2.71941 4.05929 0.96263  
H 4.60936 2.2869 0.43344  
C 3.52572 -0.42692 0.09877  
C -2.71618 0.64337 1.06891  
C -3.40103 1.89364 1.37217  
C -2.44389 2.87372 1.41183  
C -1.16493 2.23089 1.13566  
C 0.06693 2.90299 1.08875  
H -2.59295 3.92539 1.60902  
H -4.46355 2.00978 1.52964  
C -1.13918 -3.31145 0.14556  
C -2.40886 -4.01946 0.20353  
C -3.37475 -3.09059 0.49604  
C -2.70612 -1.80437 0.61974  
C -3.35520 -0.59917 0.93236  
H -4.43338 -3.26727 0.61985  
H -2.54810 -5.08005 0.05198  
C 2.88594 -1.66953 -0.03741  
C 3.56965 -2.91586 -0.36090  
C 2.61221 -3.89436 -0.41842  
C 1.33382 -3.25518 -0.13170  
C 0.09968 -3.92403 -0.10459  
H 2.75936 -4.94074 -0.64312  
H 4.63042 -3.02797 -0.53208  
C 0.05724 4.38106 1.34101  
C -4.83975 -0.64079 1.13670  
C 0.10606 5.40130 -0.35772  
C 5.01538 -0.39118 -0.06086  
C 5.88770 -0.78249 0.96336  
C 7.27483 -0.74090 0.82366  
C 7.90060 -0.30313 -0.36383  
C 7.03029 0.08746 -1.39964  
C 5.63834 0.03864 -1.23625  
F 5.37121 -1.21862 2.17180  
F 8.03141 -1.14795 1.91451  
N 9.40189 -0.27745 -0.43945  
F 7.47935 0.53576 -2.63063  
F 4.85884 0.43595 -2.31061  
C 9.96962 0.21282 -1.78667  
C 9.95545 0.67875 0.64325  
C 9.95464 -1.70642 -0.22622  
H 11.04075 -1.65159 -0.30680  
H 9.67296 -2.06560 0.76049  
H 9.54437 -2.34940 -1.00579  
H 11.04257 0.67309 0.55867  
H 9.56145 1.67709 0.44971  
H 9.65765 0.32962 1.62905  
H 11.05491 0.17959 -1.69031  
H 9.64623 -0.45241 -2.58467  
H 9.64273 1.23381 -1.97223  
C 0.40487 -6.33115 0.64246  
C 0.42086 -7.71681 0.42898  
C 0.13307 -8.26321 -0.83667  
C -0.16871 -7.32678 -1.84916  
C -0.18265 -5.95195 -1.61286  
F 0.69729 -5.88202 1.92009  
F 0.73226 -8.49479 1.53172  
F -0.46260 -7.75034 -3.13938  
F -0.48675 -5.11446 -2.67258  
N 0.12839 -9.70305 -1.16438  
C 0.45767 -10.65481 0.02457  
C -1.27650 -10.14651 -1.66196  
C -2.70653 -11.82078 0.63928  
C -3.35710 -10.60987 0.92375  
H -4.43961 -3.27729 0.62611  
H -2.54934 -5.10496 0.11966  
C 2.87342 -1.67248 -0.06051  
C 3.55772 -2.91836 -0.37727

H 0.95324 -9.45948 -3.15365  
H 2.16589 -9.71855 -1.85802  
H -1.24429 -11.21565 -1.87354  
H -0.99425 -9.93689 -0.86775  
H -1.52565 -9.59652 -2.56610  
C -5.41857 -0.84705 2.39541  
C -6.79986 -0.88361 2.58745  
C -7.71355 -0.71217 1.52501  
C -7.13836 -0.50401 2.56488  
C -5.74673 -0.47300 0.08668  
F -4.60442 -1.02506 3.50096  
F -7.25360 -1.09890 3.88305  
N -9.18946 -0.76102 1.80615  
F -7.89163 -0.31892 -0.89071  
F -5.26717 -0.26141 -1.19558  
C -10.08795 -0.55894 0.56878  
C -9.55838 -2.14432 2.39236  
C -9.56185 0.36130 2.80370  
H -11.11599 -0.61807 0.92707  
H -9.89983 0.42146 0.13557  
H -9.89905 -1.34906 -0.15516  
H -10.63438 -2.14596 2.56873  
H -9.29958 -2.9806 1.66114  
H -9.02838 -2.30038 3.32889  
H -10.63622 0.29785 2.97923  
H -9.02308 0.21729 3.73702  
H -9.30403 1.31927 2.35036  
C 0.20323 4.92564 2.62301  
C 0.18232 6.30033 1.85958  
C 0.01341 7.42017 1.82156  
C -0.12977 6.70139 0.52908  
C -0.10665 5.31627 0.31489  
F 0.37067 4.05243 2.70835  
F 0.32838 6.71803 4.17706  
N -0.01387 8.70857 2.15416  
F -0.30191 7.48346 -0.60078  
F -0.25767 4.87155 -0.98851  
C -0.18937 9.63667 0.93495  
C -1.20101 8.99843 3.10363  
C 1.31672 9.11772 8.22943  
H -1.19182 10.06683 3.32230  
H -2.12319 8.71996 2.95268  
H -1.08153 8.43057 4.02332  
H -0.19537 10.65489 1.32398  
H 0.64630 9.50490 0.25010  
H 1.13518 9.41953 0.44292  
H 1.26535 10.18932 3.02456  
H 1.43602 8.57462 3.76359  
H 2.13427 8.89297 2.14394  
H -0.82635 -0.69426 -1.78859  
C 0.45268 -1.07502 3.65596  
C 0.61289 -1.33444 5.08405  
H 1.66346 -1.54129 5.31325  
H 0.28913 -0.64348 5.66334  
H 0.00963 -2.19941 5.37892

## 2 + xanthene cation

156  
(5/3) Intermediate  
Mn 0.07028 -0.51004 0.43956  
O 0.33726 -0.87767 2.52538  
O -0.15380 -1.04832 -1.34524  
N 1.49860 0.93357 0.58989  
N -1.35119 0.85739 0.94948  
N -1.33761 -1.97985 0.44214  
N 1.51135 -1.90681 0.09906  
C 2.86308 0.77931 0.37385  
C 3.53895 0.06700 0.52670  
C 2.57637 2.98752 0.83200  
C 1.30293 2.28145 0.86867  
H 2.71999 4.04238 1.01651  
H 4.60074 2.23120 0.42498  
C 3.51155 -0.42805 0.06606  
C -2.71713 0.63120 1.06965  
C -3.40294 1.87772 1.38296  
C -2.44477 2.85547 1.44908  
C -1.16483 2.21575 1.17498  
C 0.06730 2.88790 1.14348  
H -2.59417 3.90349 1.66452  
H -4.46618 1.99229 1.53569  
C -1.13796 -3.33752 0.20894  
C -2.41024 -4.04278 0.25994  
C -3.37788 -

C 2.60623 -3.90487 -0.39910  
C 1.32925 -3.27144 -0.10150  
C 0.10098 -3.94919 -0.04158  
H 2.75756 -4.95437 -0.60546  
H 4.61593 -3.02733 -0.56516  
C 0.05731 4.36258 1.41284  
C -4.84652 -0.63894 1.09156  
C 0.11350 -5.42945 -0.27589  
C 4.99726 -0.38456 -0.12444  
C 5.89320 -0.77670 0.87877  
C 7.27684 -0.72354 0.71090  
C 7.87486 -0.27238 -0.48581  
C 6.98079 0.11946 -1.50089  
C 5.59316 0.05863 -1.30857  
F 5.40457 -1.22445 2.09426  
F 8.06021 -1.13216 1.78290  
N 9.37399 -0.23459 -0.59147  
F 7.40089 0.58154 -2.73680  
F 4.78777 -0.46144 -2.36397  
C 9.91131 0.26867 -1.94644  
C 9.94093 0.71983 0.48604  
C 9.94221 -1.66062 -0.39873  
H 11.02597 -1.59636 -0.50088  
H 9.68335 -2.02828 0.59106  
H 9.52122 -2.30162 -1.17419  
H 11.02547 0.73036 0.37436  
H 9.52830 1.71408 0.31107  
H 9.67277 0.35782 1.47571  
H 10.99550 0.24189 -1.87157  
H 9.57671 -0.39319 -2.74270  
H 9.57468 1.28885 -2.11804  
C 0.40448 -6.34630 0.73825  
C 0.42721 -7.73438 0.54073  
C 0.15484 -8.29606 -0.72171  
C -0.13874 -7.37238 -1.74830  
C -0.15970 -5.99508 -1.52776  
F 0.68320 -5.88091 2.01302  
F 0.72902 -8.49879 1.65534  
F -0.41694 -7.81131 -3.03673  
F -0.45540 -5.17009 -2.59967  
N 0.15865 -9.76681 -1.03260  
C 0.47714 -10.67744 0.17010  
C -1.23908 -10.19291 -1.54220  
C 1.23677 -10.06041 -2.10248  
H 4.48685 -11.70027 -0.20636  
H 1.47007 -10.44756 0.55017  
H -0.27810 -10.54244 0.94193  
H 1.22282 -11.13350 -2.29565  
H 1.00746 -9.51435 -3.01442  
H 2.20444 -9.75700 -1.70111  
H -1.20195 -11.26481 -1.73842  
H -1.96761 -9.97360 -0.76041  
H -1.47769 -9.65608 -2.45703  
C -5.46014 -0.91946 2.31882  
C -6.84603 -0.92669 2.47869  
C -7.72975 -0.66038 1.41026  
C -7.11961 -0.37995 0.17223  
C -5.72398 -0.37172 0.03710  
F -4.67670 -1.19083 3.42742  
F -7.33519 -1.20075 3.74964  
N -9.21226 -0.68022 1.65765  
F -7.84054 -0.09627 -0.97552  
F -5.20813 -0.07797 -1.21636  
C -10.07636 -0.40523 0.41050  
C -9.63626 -2.07339 2.18137  
C -9.57221 0.41387 2.68999  
H -11.11353 -0.46289 0.74146  
H -9.86171 0.59077 0.02941  
H -9.88200 -1.16341 -0.34560  
H -10.71702 -2.05106 2.32427  
H -9.36519 -2.81746 1.43135  
H -9.14085 -2.27844 3.12697  
H -10.65094 0.37453 2.84463  
H -9.05374 0.22048 3.62620  
H -9.28021 1.37996 2.27636  
C 0.20522 4.89344 2.70021  
C 0.18121 6.26559 2.95170  
C 0.00763 7.21831 1.92407  
C -0.13730 6.69115 0.62594  
C -0.11151 5.30796 0.39757  
F 0.37674 4.03886 3.77566  
F 0.32937 6.66931 4.27273  
N -0.02088 8.68091 2.27254  
F -0.31399 7.48446 -0.49521  
F -0.26596 4.87618 -0.91085  
C -0.20083 9.62172 1.06366  
C -1.20589 8.95913 3.22832  
C 1.31121 9.08436 2.94860  
H -1.19650 10.02489 3.45952  
H -2.12920 8.68648 2.71624  
H -1.08407 8.38064 4.14104  
H -0.20973 10.63570 1.46362  
H 0.63466 9.50029 0.37661

H 1.14646 9.40681 0.57026  
H 1.25978 10.15402 3.15388  
H 1.43283 8.53255 3.87735  
H 2.12726 8.86649 2.25911  
C -4.15802 2.70333 -3.20479  
C -4.24821 3.78505 -4.13189  
C -3.10715 4.33356 -4.72743  
C -1.85932 3.78956 -4.38839  
C -2.91979 2.17127 -2.87151  
C -1.72814 2.70494 -3.45962  
O -0.73796 4.33222 -4.98499  
C 0.52679 3.84921 -4.71056  
C -0.43917 2.20315 -3.16645  
C 0.69984 2.76585 -3.78707  
C 1.61179 4.45342 -5.36288  
C 2.89582 3.96841 -5.09177  
C 3.10810 2.89101 -4.17974  
C 0.20297 2.29811 -3.53661  
H 1.44262 5.27081 -0.65481  
H 3.74943 4.42152 -5.58704  
H 4.11710 2.53911 -3.99374  
H 2.17240 1.47617 -2.84190  
H -0.30259 -0.99541 -1.87627  
H -0.32422 1.36958 -2.45988  
H -3.16810 5.15406 -5.43355  
H -5.22387 4.19101 -4.38190  
H -5.06353 2.30047 -2.76377  
H -2.83175 1.34674 -2.17091  
C 0.67872 -1.09442 3.66574  
C 0.65404 -1.36614 5.08946  
H 1.70952 -1.55841 5.30854  
H 0.32076 -0.50663 5.68031  
H 0.06684 -2.24377 5.37932

156

(5/3) Reb Transition State

Mn 0.25458 0.17992 -0.24660  
N 0.02647 -0.32898 1.75574  
O -0.54551 0.57747 -2.05628  
N 1.15088 1.62370 -0.03010  
N -1.69216 1.48231 0.36851  
N -1.64780 -1.29104 -0.37351  
N 1.20427 -1.16666 -0.70308  
C 2.53171 1.48061 -0.15949  
C 3.19048 2.74355 0.13185  
C 2.20819 3.65026 0.43671  
C 0.93855 2.94814 0.34958  
H 2.33802 4.68742 0.70915  
H 4.25611 2.91816 0.11757  
C 3.20453 0.29801 -0.50795  
C -3.05159 1.22451 0.51264  
C -3.75126 2.44337 0.89183  
C -2.80997 3.43547 0.98027  
C -1.52508 2.83295 0.65646  
C -0.30434 3.52540 0.65065  
H -2.97487 4.47191 1.23613  
H -4.81468 2.53707 1.05707  
C -1.43164 -2.62019 -0.73395  
C -2.68105 -3.35947 -0.67081  
C -3.65143 -2.47826 -0.26762  
C -3.00888 -1.18734 -0.08716  
C -3.67378 -0.01908 0.31830  
H -4.46951 -2.69219 -0.09861  
H -2.80335 -4.41094 -0.88573  
C 2.57008 -0.92207 -0.79181  
C 3.26258 -2.12220 -1.23985  
C 2.31020 -3.09027 -1.42137  
C 1.02752 -0.99123 -1.07281  
C -0.19523 -3.18440 -1.08719  
H 2.46414 -4.10252 -1.76505  
H 4.32530 -2.20967 -1.41311  
C -0.32911 4.97912 1.01618  
C -5.14889 -0.10778 0.56024  
C -0.18549 -4.62421 -1.50101  
C 4.70256 0.32709 -0.53963  
C 5.47328 -0.24342 0.48332  
C 6.86772 -0.22002 0.47435  
C 7.60633 0.38049 -0.56825  
C 6.84016 0.95462 -1.60063  
C 5.43877 0.92074 -1.56836  
F 4.84338 -0.84754 1.55785  
F 7.51722 -0.81518 1.54812  
N 9.10856 0.36997 -0.50951  
F 7.40318 1.57833 -2.70068  
F 4.76864 1.50740 -2.63167  
C 9.80959 1.05628 -1.70433  
C 5.97884 1.11898 0.76019  
C 9.61482 -1.09182 -0.49343  
H 10.70395 -1.06031 -0.45349  
H 9.22492 -1.60647 0.38138  
H 9.28139 -1.57710 -1.41137  
H 10.67025 1.12811 0.75007  
H 9.18992 2.13689 0.71921

H 9.21999 0.60163 1.64625  
H 10.87258 0.96898 -1.52700  
H 9.53170 0.54358 -2.62550  
H 9.51210 2.10477 -1.74133  
C 0.23293 -5.65257 -0.65158  
C 0.23948 -7.00515 -1.02191  
C -0.18487 -7.41338 -2.30102  
C -0.60159 -6.37635 -3.16372  
C -0.62006 -5.03734 -2.77335  
F 0.65642 -5.34228 0.63059  
F 0.68056 -7.89366 -0.05609  
F -1.02866 -6.65937 -4.45480  
F -1.02365 -4.09307 -3.69399  
N -0.21713 -8.83568 -2.78853  
C 0.24087 -9.88207 -1.75173  
C -1.66573 -9.21675 -3.17880  
C 0.72260 -8.98390 -4.00903  
H 0.15385 -10.85207 -2.24134  
H 1.27599 -9.69632 -1.47298  
H -0.40990 -9.84474 -0.88037  
H 0.69231 -10.02850 -4.32096  
H 3.71268 -8.34396 -4.81743  
H 1.73128 -8.70733 -3.69960  
H -1.65142 -10.25515 -3.51128  
H -2.29745 -9.10680 -2.29663  
H -2.01073 -8.57385 -3.98467  
F -5.69919 -0.13001 1.84863  
C -7.07247 -0.22138 2.07574  
C -8.00846 -0.30523 1.02201  
C -7.46290 -0.27277 -0.27600  
C -6.07929 -0.17920 -0.48095  
F -4.86274 -0.07212 2.95050  
F -7.49483 -0.22923 3.39906  
N -9.47342 -0.41325 1.34353  
F -8.23903 -0.33708 -1.42100  
F -5.63327 -0.14498 -1.79255  
C -10.39283 -0.52072 0.11002  
C -9.72494 -1.68460 2.19009  
C -9.92510 0.84481 2.12233  
H -11.40913 -0.61104 0.49372  
H -10.30187 0.37947 -0.49439  
H -10.13123 -1.46061 -0.46646  
H -10.79616 -1.74175 2.38473  
H -9.39559 -2.54999 1.61431  
H -9.18066 -1.61492 3.12858  
H -10.99262 0.74216 2.32078  
H -9.37608 0.91134 3.05860  
H -9.73577 1.71835 1.49774  
C -0.25966 5.42291 2.34255  
C -0.29904 6.77566 2.68168  
C -0.41297 7.79407 1.71029  
C -0.47847 7.35476 0.37392  
C -0.43522 5.98960 0.05683  
F -0.15218 4.49828 3.36683  
F -0.22862 7.09169 4.03236  
N -0.46729 9.23017 1.25173  
F -0.59212 8.22087 -0.69980  
F -0.51299 5.64379 -1.28359  
C -0.58337 5.02517 1.00186  
C -1.70641 9.44115 3.05458  
C 0.82526 9.58693 2.92401  
H -1.73162 10.49467 3.33414  
H -2.59591 9.17658 2.48158  
H -1.62109 8.82238 3.94475  
H -0.61104 11.23547 1.47078  
H 0.28548 10.17339 0.35117  
H 1.50270 10.07575 0.44738  
H 0.75872 10.63928 3.20207  
H 0.90153 8.96954 3.81546  
H 1.67551 9.91979 2.26187  
C -3.74952 3.50043 -3.41592  
C -4.26377 2.94835 -4.62090  
C -3.46667 2.13617 -5.43548  
C -2.14673 1.87229 -5.03420  
C -2.44197 3.22329 -3.02407  
C -1.60878 2.39118 -3.82340  
O -1.37500 1.09242 -5.88843  
C -0.02549 0.88909 -5.62031  
C -0.25600 2.05333 -3.44998  
C 0.56710 1.38152 -4.42516  
C 0.71894 0.19777 -6.58991  
C 2.08838 0.00726 -6.37057  
C 2.71526 0.50518 -5.19569  
C 1.96244 1.18056 -4.23746  
H 0.622819 -0.16337 -7.48726  
H 2.67940 -0.52120 -7.11287  
H 3.77977 0.35653 -5.04760  
H 2.43110 1.55822 -3.33505  
H -1.22885 -0.00348 -2.45564  
H 0.22678 2.60990 -2.65590  
H -3.83832 1.71912 -6.36522  
H -5.28535 3.16514 -4.91899  
H -4.38038 4.13634 -2.80329

H -2.04243 3.63754 -2.10433  
C 0.18249 -0.62602 2.87538  
C 0.37679 -1.00034 4.27217  
H 1.42666 -1.25600 4.44932  
H 0.09887 -0.16764 4.92657  
H -0.24555 -1.86727 4.51763

156

(5/3) Hydroxylated Product  
Mn 0.02922 -0.08214 0.32736  
N 0.26303 -0.52139 2.26747  
O -0.31151 0.22339 -1.59438  
N 1.40284 1.38639 0.49389  
N -1.42708 1.21630 0.86658  
N -1.35498 -1.55926 0.15227  
N 1.49504 -1.40838 -0.11603  
C 2.78203 1.27586 0.29901  
C 3.42908 2.53920 0.60248  
C 2.44988 3.40702 1.01154  
C 1.19010 2.68862 0.95532  
H 2.57688 4.43191 1.32713  
H 4.48856 2.73653 0.53329  
C 3.46753 0.10795 -0.06353  
C -2.79582 0.95984 0.94399  
C -3.50110 2.15786 1.36651  
C -2.55684 3.13037 1.57043  
C -1.26554 2.54332 1.25744  
C -0.04684 3.23442 1.32537  
H -7.25207 4.14932 1.88648  
H -4.57004 2.24913 1.49142  
C -1.11751 -2.90781 -0.12398  
C -2.36809 -3.64370 -0.10602  
C -3.36328 -2.74375 0.17923  
C -2.73244 -1.44849 0.35300  
C -3.41563 -0.27302 0.69605  
H -4.41969 -2.94723 0.27352  
H -2.47757 -4.70391 -0.28003  
C 2.85548 -1.13990 -0.25304  
C 3.56636 -2.35218 -0.62045  
C 2.63657 -3.35618 -0.69902  
C 1.34545 -2.76839 -0.38528  
C 0.13730 -3.48019 -0.37630  
H 2.81156 -4.39028 -0.95657  
H 4.62815 -2.42797 -0.80234  
C -0.06468 4.63410 1.86113  
C -4.90509 -0.35065 0.84344  
C 0.19013 -4.95125 -0.65609  
C 4.95793 0.18604 -0.20151  
C 5.82489 -0.21867 0.82191  
C 7.21241 -0.14243 0.70103  
C 7.84262 0.34269 -0.46575  
C 6.97697 0.57162 -1.49852  
C 5.58475 0.67030 -1.35247  
F 5.30131 -0.70489 2.00718  
F 7.96580 -0.56573 1.78809  
N 9.34386 0.38842 -0.52750  
F 7.42924 1.24953 -2.70809  
F 4.80672 1.09056 -2.41982  
C 9.91608 0.91881 -1.85776  
C 9.87782 1.32316 0.58391  
C 9.91061 -1.04025 -0.34637  
H 10.99600 -0.97338 -0.42599  
H 9.63266 -1.42410 0.63202  
H 9.50660 -1.66964 -1.14016  
H 10.96549 1.33407 0.50638  
H 9.47256 2.32130 0.41386  
H 9.57784 0.94370 1.55780  
H 11.00076 0.89711 -1.75252  
H 9.60789 0.26934 -2.67485  
H 9.57740 1.93950 -0.20209  
C 0.52468 -5.88496 0.32875  
C 0.57910 -7.26635 0.09486  
C 2.94470 -7.80241 -1.17607  
C -0.04310 -6.86111 -2.17260  
C -0.09294 -5.49047 -1.91720  
F 0.81395 -5.44388 1.60939  
F 0.92350 -8.04944 1.18308  
F -0.34192 -7.27457 -3.46412  
F -0.43076 -6.45557 -2.96015  
N 0.32319 -9.26497 -1.52288  
C 0.70210 -10.19465 -0.35264  
C -1.08102 -9.71046 -1.99761  
C 1.37289 -9.50795 -2.63353  
H 0.68714 -11.20893 -0.75189  
H 1.70047 -9.94790 0.00218  
H -0.03153 -10.09673 0.44505  
H 1.38793 -10.57801 -2.84271  
H 1.09429 -8.95713 -3.52858  
H 2.34350 -9.17867 -2.26074  
H -1.02865 -10.77660 -2.22015  
H -1.78812 -9.52517 -1.18789  
H -1.35964 -9.15756 -2.89146  
C -5.52905 -0.54949 2.08136

C -6.91552 -0.62147 2.21605  
C -7.78770 -0.50178 1.12178  
C -7.16636 -0.30031 -0.13480  
C -5.77031 -0.23082 -0.24760  
F -4.75561 -0.68495 3.22125  
F -7.41680 -0.82799 3.49507  
N -9.27190 -0.59002 1.33343  
F -7.87572 -0.15725 -1.31471  
F -5.24181 -0.02829 -1.51149  
C -10.12413 -0.43545 0.05699  
C -9.62378 -1.97421 1.92925  
C -9.71886 0.53793 2.29412  
H -11.16315 -0.52985 0.37323  
H -9.95510 0.54657 -0.38066  
H -9.87580 -1.22537 -0.64854  
H -10.70547 -2.00438 0.26292  
H -9.30415 -2.74211 1.22333  
H -9.12743 -2.09884 2.88864  
H -10.79874 0.45052 2.41803  
H -9.22256 0.42081 3.25433  
H -9.46306 1.49515 1.83791  
C -0.09907 4.89601 3.23729  
C -0.10854 6.19203 3.75204  
C -0.08893 7.33386 2.92183  
C -0.05595 7.07809 1.53731  
C -0.04366 5.76594 1.04252  
F -0.11552 3.84068 4.13241  
F -0.13859 6.32313 5.13415  
N -0.10065 8.70016 3.54831  
F -0.03335 8.08294 5.58570  
F -0.01353 5.60486 -0.33393  
C -0.08676 9.86833 2.54091  
C -1.38427 8.81033 4.39525  
C 1.15539 8.87143 4.35358  
H -1.15093 8.12524 5.22637  
H -2.24522 8.75334 3.73613  
H -1.40125 8.12905 5.19062  
H -0.10063 10.78301 3.13413  
H 0.82166 9.82503 1.94353  
H -0.97287 9.81802 1.91108  
H 1.11587 9.87222 4.86630  
H 1.15093 8.12524 5.22637  
H 2.03692 8.76242 3.80240  
C -2.44155 5.67692 -2.73071  
C -3.21623 3.61510 -3.85739  
C -2.85932 2.50274 -4.63661  
H -0.97287 9.81802 1.91108  
H 1.11587 9.87222 4.86630  
H 1.15093 8.12524 5.22637  
O -1.39663 0.67742 -5.10801  
C -0.13613 0.07651 -4.96693  
C 0.18486 1.18472 -2.72147  
C 0.69123 0.33458 -3.85194  
C 0.26322 -0.82743 -6.00499  
C 1.52998 -1.38063 -5.94253  
C 2.39353 -1.11144 -4.85482  
C 1.97172 -0.26279 -3.82286  
H -0.40752 -0.94542 -6.84052  
H 1.85130 -2.04242 -6.74182  
H 3.38078 -1.56190 -4.81957  
H 2.63414 -0.05509 -2.88896  
H -0.93043 -0.44784 -1.95291  
H 0.97559 1.72102 -2.19775  
H -3.42371 2.21996 -5.51649  
H -4.08366 4.20735 -4.13477  
H -2.70932 4.85001 -2.14350  
H -0.73321 3.48491 -1.51005  
C 0.39771 -0.78118 3.39830  
C 0.56245 -1.10727 4.80927  
H 1.62006 -1.28418 5.03116  
H 0.20210 -0.27955 5.42893  
H -0.00849 -2.00936 5.05306
